# Supplementary material for: Complete chloroplast genome assembly and phylogenetic analysis of blackcurrant (Ribes nigrum), red and white currant (Ribes rubrum), and gooseberry (Ribes uva-crispa) provide new insights into the phylogeny of Grossulariaceae
Source: PeerJ. 2023 Oct 10;11:e16272. doi: 10.7717/peerj.16272 (PMC10573389; doi:10.7717/peerj.16272)
Supplement: Supplemental Information 2 [file peerj-11-16272-s002.xlsx]

## Sheet: Table_S7.
Table S7. SNPs identified in the nine Ribes chloroplast genomes
Number	Position	Location	Nucleotide position	Red/White currant (Ribes rubrum)	Nucleotide position	Blackcurrant (Ribes nigrum)	Nucleotide position	Gooseberry (Ribes uva-crispa)	Nucleotide position	Ribes glaciale	Nucleotide position	Ribes nevadense	Nucleotide position	Ribes roezlii	Nucleotide position	Ribes odoratum	Nucleotide position	Ribes fasciculatum var. chinense
1	IGS (trnH-GUG, psbA)	LSC	88	T	92	T	92	T	88	T	16	T	16	T	92	T	91	G
2	IGS (trnH-GUG, psbA)	LSC	91	T	95	T	95	T	91	T	19	T	19	T	93	A	94	T
3	IGS (trnH-GUG, psbA)	LSC	98	T	102	G	102	G	98	T	26	G	26	G	100	T	101	T
4	IGS (trnH-GUG, psbA)	LSC	106	A	110	A	110	A	106	C	34	A	34	A	108	A	109	A
5	IGS (trnH-GUG, psbA)	LSC	114	T	118	T	118	T	114	T	42	T	42	T	116	T	117	C
6	IGS (trnH-GUG, psbA)	LSC	132	A	136	C	136	A	132	A	60	A	60	A	134	A	135	A
7	IGS (trnH-GUG, psbA)	LSC	133	C	137	C	137	C	133	C	61	A	61	C	135	C	136	C
8	IGS (trnH-GUG, psbA)	LSC	142	C	146	C	146	C	142	C	70	C	70	C	144	C	145	T
9	IGS (trnH-GUG, psbA)	LSC	160	A	164	A	164	A	160	A	88	A	88	A	162	C	163	A
10	IGS (trnH-GUG, psbA)	LSC	167	T	171	G	171	G	167	T	95	G	95	G	169	G	170	G
11	IGS (trnH-GUG, psbA)	LSC	169	C	173	A	173	A	169	A	97	A	97	A	171	A	172	A
12	IGS (trnH-GUG, psbA)	LSC	197	G	200	T	199	T	197	T	124	T	123	T	198	T	195	T
13	IGS (trnH-GUG, psbA)	LSC	211	A	214	A	213	A	211	A	138	G	137	A	212	A	209	A
14	IGS (trnH-GUG, psbA)	LSC	217	T	220	T	219	C	217	T	144	T	143	T	218	T	215	T
15	IGS (trnH-GUG, psbA)	LSC	221	T	224	T	237	T	221	T	148	T	147	T	222	G	219	T
16	IGS (trnH-GUG, psbA)	LSC	231	A	234	A	247	A	231	A	158	A	157	A	232	A	229	G
17	IGS (trnH-GUG, psbA)	LSC	234	G	237	G	250	G	234	G	161	G	160	G	235	A	232	G
18	IGS (trnH-GUG, psbA)	LSC	254	C	257	C	270	C	254	A	181	C	180	C	255	A	252	C
19	IGS (trnH-GUG, psbA)	LSC	257	T	260	C	273	T	257	T	184	C	183	T	258	T	255	T
20	IGS (trnH-GUG, psbA)	LSC	261	G	264	G	277	T	261	G	188	G	187	G	262	G	259	G
21	IGS (trnH-GUG, psbA)	LSC	262	A	265	A	278	T	262	A	189	A	188	A	263	A	260	A
22	IGS (trnH-GUG, psbA)	LSC	267	T	270	T	283	T	267	T	194	A	193	T	268	T	265	T
23	IGS (trnH-GUG, psbA)	LSC	272	A	275	A	288	A	272	C	199	A	198	A	273	A	270	A
24	IGS (trnH-GUG, psbA)	LSC	282	T	285	T	298	T	282	T	209	T	208	T	283	C	280	T
25	IGS (trnH-GUG, psbA)	LSC	292	C	295	C	308	C	292	C	219	C	218	A	293	C	290	C
26	IGS (trnH-GUG, psbA)	LSC	299	C	302	C	315	C	299	C	226	C	225	C	300	T	297	C
27	IGS (trnH-GUG, psbA)	LSC	303	G	306	G	319	G	303	G	230	G	229	G	304	A	301	G
28	IGS (trnH-GUG, psbA)	LSC	313	A	316	A	329	A	313	A	240	A	239	C	314	A	311	A
29	IGS (trnH-GUG, psbA)	LSC	314	G	317	G	330	G	314	T	241	G	240	G	315	G	312	G
30	IGS (trnH-GUG, psbA)	LSC	420	A	429	A	442	A	420	A	353	A	352	A	427	A	424	C
31	psbA	LSC	453	G	462	A	475	G	453	G	386	A	385	G	460	G	457	G
32	psbA	LSC	474	G	483	G	496	G	474	G	407	G	406	G	481	G	478	A
33	psbA	LSC	654	C	663	A	676	A	654	A	587	A	586	A	661	A	658	A
34	psbA	LSC	732	C	741	A	754	C	732	C	665	A	664	C	739	C	736	C
35	psbA	LSC	960	A	969	G	982	G	960	A	893	G	892	G	967	A	964	A
36	psbA	LSC	971	G	980	G	993	G	971	G	904	A	903	G	978	G	975	A
37	psbA	LSC	981	G	990	A	1003	A	981	A	914	A	913	A	988	A	985	A
38	psbA	LSC	1028	T	1037	T	1050	T	1028	C	961	T	960	T	1035	T	1032	T
39	psbA	LSC	1260	A	1269	G	1282	G	1260	G	1193	G	1192	G	1267	G	1264	G
40	IGS (psbA, trnK-UUU)	LSC	1492	G	1501	G	1514	G	1492	G	1425	G	1424	G	1499	G	1496	T
41	IGS (psbA, trnK-UUU)	LSC	1514	C	1523	C	1536	C	1514	C	1447	C	1446	T	1521	C	1518	C
42	IGS (psbA, trnK-UUU)	LSC	1552	A	1561	A	1574	A	1552	A	1485	T	1484	A	1559	A	1556	A
43	IGS (psbA, trnK-UUU)	LSC	1583	C	1592	A	1605	C	1583	C	1516	C	1515	C	1590	C	1587	C
44	IGS (psbA, trnK-UUU)	LSC	1586	T	1595	C	1608	C	1586	T	1519	C	1518	C	1593	C	1590	C
45	IGS (psbA, trnK-UUU)	LSC	1605	T	1614	T	1627	T	1605	T	1538	T	1537	T	1612	T	1609	C
46	IGS (psbA, trnK-UUU)	LSC	1629	G	1638	G	1651	G	1629	G	1562	G	1561	G	1636	G	1633	A
47	IGS (psbA, trnK-UUU)	LSC	1632	G	1641	G	1654	G	1632	G	1565	G	1564	G	1639	G	1636	A
48	IGS (psbA, trnK-UUU)	LSC	1640	C	1649	C	1662	C	1640	C	1573	C	1572	C	1647	C	1644	A
49	IGS (psbA, trnK-UUU)	LSC	1651	C	1660	C	1673	C	1651	C	1584	C	1583	C	1658	C	1655	A
50	IGS (psbA, trnK-UUU)	LSC	1693	C	1702	C	1715	C	1693	C	1626	C	1625	C	1701	C	1704	A
51	IGS (psbA, trnK-UUU)	LSC	1720	T	1729	T	1742	T	1720	T	1653	T	1652	T	1734	C	1731	T
52	IGS (psbA, trnK-UUU)	LSC	1723	A	1732	C	1745	A	1723	A	1656	A	1655	A	1737	A	1734	A
53	IGS (psbA, trnK-UUU)	LSC	1733	G	1742	G	1755	C	1733	G	1666	G	1665	G	1747	G	1744	G
54	trnK-UUU-intron 1	LSC	1874	A	1883	A	1896	A	1874	A	1807	A	1806	A	1881	A	1885	G
55	trnK-UUU-intron 1	LSC	1877	C	1886	C	1899	C	1877	C	1810	C	1809	C	1884	A	1888	C
56	trnK-UUU-intron 1	LSC	1920	G	1929	G	1943	A	1920	G	1852	G	1852	G	1927	G	1931	G
57	trnK-UUU-intron 1	LSC	1957	T	1966	G	1980	G	1957	G	1889	G	1889	G	1964	G	1968	G
58	trnK-UUU-intron 1	LSC	1989	A	1998	G	2012	G	1989	A	1921	G	1921	G	1996	G	2000	G
59	trnK-UUU-intron 1	LSC	2012	T	2021	G	2035	T	2012	T	1944	T	1944	T	2019	T	2023	T
60	trnK-UUU-intron 1, matK	LSC	2036	T	2045	T	2059	T	2036	T	1968	T	1968	T	2043	T	2047	G
61	trnK-UUU-intron 1, matK	LSC	2042	A	2051	A	2065	A	2042	A	1974	A	1974	G	2049	A	2053	A
62	trnK-UUU-intron 1, matK	LSC	2044	C	2053	C	2067	C	2044	C	1976	C	1976	T	2051	C	2055	C
63	trnK-UUU-intron 1, matK	LSC	2107	A	2116	A	2130	A	2107	A	2039	A	2039	A	2114	G	2118	A
64	trnK-UUU-intron 1, matK	LSC	2152	C	2161	C	2175	C	2152	C	2084	C	2084	C	2159	C	2163	T
65	trnK-UUU-intron 1, matK	LSC	2153	G	2162	G	2176	G	2153	G	2085	A	2085	G	2160	G	2164	G
66	trnK-UUU-intron 1, matK	LSC	2164	T	2173	T	2187	T	2164	T	2096	G	2096	T	2171	T	2175	G
67	trnK-UUU-intron 1, matK	LSC	2167	T	2176	C	2190	C	2167	T	2099	C	2099	C	2174	C	2178	C
68	trnK-UUU-intron 1, matK	LSC	2182	T	2191	T	2205	T	2182	T	2114	T	2114	C	2189	T	2193	T
69	trnK-UUU-intron 1, matK	LSC	2286	T	2295	T	2309	T	2286	T	2218	T	2218	T	2293	C	2297	T
70	trnK-UUU-intron 1, matK	LSC	2296	G	2305	G	2319	G	2296	G	2228	G	2228	G	2303	G	2307	A
71	trnK-UUU-intron 1, matK	LSC	2311	A	2320	A	2334	A	2311	A	2243	C	2243	A	2318	A	2322	A
72	trnK-UUU-intron 1, matK	LSC	2329	C	2338	C	2352	C	2329	C	2261	C	2261	C	2336	C	2340	G
73	trnK-UUU-intron 1, matK	LSC	2400	C	2409	C	2423	C	2400	C	2332	C	2332	C	2407	G	2411	C
74	trnK-UUU-intron 1, matK	LSC	2429	C	2438	C	2452	C	2429	T	2361	C	2361	C	2436	C	2440	C
75	trnK-UUU-intron 1, matK	LSC	2467	T	2476	C	2490	C	2467	C	2399	C	2399	C	2474	C	2478	C
76	trnK-UUU-intron 1, matK	LSC	2471	A	2480	A	2494	A	2471	A	2403	C	2403	A	2478	A	2482	A
77	trnK-UUU-intron 1, matK	LSC	2482	C	2491	C	2505	C	2482	C	2414	C	2414	C	2489	C	2493	T
78	trnK-UUU-intron 1, matK	LSC	2483	A	2492	A	2506	A	2483	A	2415	G	2415	A	2490	A	2494	A
79	trnK-UUU-intron 1, matK	LSC	2532	A	2541	G	2555	G	2532	G	2464	G	2464	G	2539	G	2543	G
80	trnK-UUU-intron 1, matK	LSC	2561	T	2570	T	2584	T	2561	T	2493	T	2493	T	2568	T	2572	G
81	trnK-UUU-intron 1, matK	LSC	2592	A	2601	A	2615	A	2592	A	2524	A	2524	A	2599	A	2603	G
82	trnK-UUU-intron 1, matK	LSC	2651	T	2660	T	2674	T	2651	T	2583	T	2583	T	2658	T	2662	C
83	trnK-UUU-intron 1, matK	LSC	2680	A	2689	A	2703	A	2680	A	2612	A	2612	A	2687	A	2691	G
84	trnK-UUU-intron 1, matK	LSC	2698	G	2707	G	2721	G	2698	G	2630	G	2630	G	2705	T	2709	G
85	trnK-UUU-intron 1, matK	LSC	2699	G	2708	G	2722	G	2699	G	2631	G	2631	G	2706	G	2710	T
86	trnK-UUU-intron 1, matK	LSC	2700	A	2709	C	2723	A	2700	A	2632	C	2632	A	2707	A	2711	A
87	trnK-UUU-intron 1, matK	LSC	2704	G	2713	T	2727	T	2704	G	2636	T	2636	T	2711	T	2715	T
88	trnK-UUU-intron 1, matK	LSC	2728	A	2737	G	2751	G	2728	A	2660	G	2660	G	2735	G	2739	G
89	trnK-UUU-intron 1, matK	LSC	2742	G	2751	G	2765	G	2742	G	2674	G	2674	G	2749	A	2753	G
90	trnK-UUU-intron 1, matK	LSC	2743	C	2752	C	2766	C	2743	C	2675	C	2675	A	2750	C	2754	C
91	trnK-UUU-intron 1, matK	LSC	2748	A	2757	A	2771	A	2748	A	2680	A	2680	A	2755	A	2759	G
92	trnK-UUU-intron 1, matK	LSC	2795	A	2804	A	2818	A	2795	A	2727	A	2727	A	2802	T	2806	A
93	trnK-UUU-intron 1, matK	LSC	2814	T	2823	T	2837	T	2814	T	2746	T	2746	T	2821	C	2825	T
94	trnK-UUU-intron 1, matK	LSC	2818	C	2827	T	2841	C	2818	C	2750	C	2750	C	2825	C	2829	C
95	trnK-UUU-intron 1, matK	LSC	2846	C	2855	C	2869	C	2846	C	2778	T	2778	C	2853	C	2857	C
96	trnK-UUU-intron 1, matK	LSC	2953	G	2962	G	2976	G	2953	A	2885	G	2885	G	2960	G	2964	G
97	trnK-UUU-intron 1, matK	LSC	2959	G	2968	C	2982	C	2959	G	2891	C	2891	C	2966	G	2970	G
98	trnK-UUU-intron 1, matK	LSC	2978	G	2987	G	3001	G	2978	G	2910	G	2910	G	2985	G	2989	A
99	trnK-UUU-intron 1, matK	LSC	2985	G	2994	G	3008	G	2985	G	2917	G	2917	G	2992	G	2996	T
100	trnK-UUU-intron 1, matK	LSC	2998	C	3007	C	3021	T	2998	C	2930	C	2930	T	3005	C	3009	C
101	trnK-UUU-intron 1, matK	LSC	3000	G	3009	T	3023	G	3000	G	2932	G	2932	G	3007	G	3011	G
102	trnK-UUU-intron 1, matK	LSC	3010	G	3019	G	3033	G	3010	A	2942	G	2942	G	3017	G	3021	G
103	trnK-UUU-intron 1, matK	LSC	3138	T	3147	T	3161	T	3138	T	3070	T	3070	T	3145	T	3149	A
104	trnK-UUU-intron 1, matK	LSC	3190	T	3199	T	3213	T	3190	G	3122	T	3122	T	3197	T	3201	T
105	trnK-UUU-intron 1, matK	LSC	3191	A	3200	A	3214	A	3191	A	3123	A	3123	A	3198	A	3202	G
106	trnK-UUU-intron 1, matK	LSC	3192	A	3201	A	3215	A	3192	A	3124	A	3124	A	3199	A	3203	C
107	trnK-UUU-intron 1, matK	LSC	3302	C	3311	C	3325	C	3302	C	3234	C	3234	C	3309	C	3313	A
108	trnK-UUU-intron 1, matK	LSC	3308	G	3317	G	3331	A	3308	G	3240	G	3240	A	3315	G	3319	G
109	trnK-UUU-intron 1, matK	LSC	3314	T	3323	T	3337	T	3314	T	3246	T	3246	T	3321	G	3325	T
110	trnK-UUU-intron 1, matK	LSC	3338	A	3347	A	3361	A	3338	A	3270	G	3270	A	3345	A	3349	A
111	trnK-UUU-intron 1, matK	LSC	3344	C	3353	C	3367	C	3344	C	3276	G	3276	C	3351	C	3355	C
112	trnK-UUU-intron 1, matK	LSC	3403	G	3412	G	3426	G	3403	G	3335	C	3335	G	3410	G	3414	G
113	trnK-UUU-intron 1, matK	LSC	3424	G	3433	G	3447	G	3424	G	3356	G	3356	G	3431	T	3435	G
114	trnK-UUU-intron 1, matK	LSC	3435	T	3444	T	3458	T	3435	C	3367	T	3367	T	3442	T	3446	T
115	trnK-UUU-intron 1, matK	LSC	3466	A	3475	T	3489	T	3466	A	3398	T	3398	T	3473	A	3477	A
116	trnK-UUU-intron 1, matK	LSC	3490	G	3499	G	3513	G	3490	G	3422	G	3422	G	3497	A	3501	G
117	trnK-UUU-intron 1	LSC	3570	A	3579	A	3593	A	3570	A	3502	A	3502	A	3577	A	3581	C
118	trnK-UUU-intron 1	LSC	3656	C	3665	T	3679	T	3656	C	3588	T	3588	T	3663	T	3667	T
119	trnK-UUU-intron 1	LSC	3666	G	3675	G	3689	G	3666	G	3598	G	3598	A	3673	G	3677	G
120	trnK-UUU-intron 1	LSC	3671	C	3680	C	3694	C	3671	C	3603	C	3603	C	3678	C	3682	T
121	trnK-UUU-intron 1	LSC	3672	T	3681	T	3695	C	3672	T	3604	T	3604	T	3679	T	3683	T
122	trnK-UUU-intron 1	LSC	3703	T	3712	C	3726	C	3703	C	3635	C	3635	C	3710	C	3714	A
123	trnK-UUU-intron 1	LSC	3761	C	3770	C	3784	C	3761	A	3693	C	3696	C	3768	C	3772	C
124	trnK-UUU-intron 1	LSC	3766	C	3775	T	3789	T	3766	C	3698	T	3701	T	3773	C	3777	C
125	trnK-UUU-intron 1	LSC	3810	T	3818	T	3833	T	3810	T	3742	T	3745	T	3817	T	3821	G
126	trnK-UUU-intron 1	LSC	3829	T	3837	T	3852	T	3829	T	3761	T	3764	T	3836	T	3840	C
127	trnK-UUU-intron 1	LSC	3918	C	3926	C	3940	C	3918	C	3850	C	3853	A	3924	C	3927	C
128	trnK-UUU-intron 1	LSC	3919	A	3927	A	3941	A	3919	A	3851	A	3854	A	3925	C	3928	A
129	trnK-UUU-intron 1	LSC	3987	G	3995	A	4009	G	3987	G	3919	G	3922	G	3993	G	3996	G
130	trnK-UUU-intron 1	LSC	4001	C	4009	C	4023	C	4001	C	3933	C	3936	C	4007	C	4010	A
131	trnK-UUU-intron 1	LSC	4028	T	4036	T	4050	T	4028	T	3960	T	3963	T	4034	G	4037	T
132	trnK-UUU-intron 1	LSC	4047	G	4055	G	4069	G	4047	G	3979	G	3982	G	4053	A	4056	G
133	trnK-UUU-intron 1	LSC	4138	G	4140	T	4154	T	4138	G	4064	T	4067	T	4144	T	4147	T
134	trnK-UUU-intron 1	LSC	4214	A	4216	A	4230	A	4214	A	4140	A	4143	A	4220	A	4223	G
135	trnK-UUU-intron 1	LSC	4216	G	4218	G	4232	G	4216	G	4142	G	4145	A	4222	G	4225	G
136	IGS (trnK-UUU, rps16)	LSC	4303	C	4305	C	4319	C	4303	A	4229	C	4232	C	4309	C	4312	A
137	IGS (trnK-UUU, rps16)	LSC	4321	G	4323	G	4337	G	4321	G	4247	G	4250	G	4327	G	4330	A
138	IGS (trnK-UUU, rps16)	LSC	4330	A	4332	G	4346	G	4330	G	4256	G	4259	G	4336	G	4339	G
139	IGS (trnK-UUU, rps16)	LSC	4386	T	4388	C	4402	C	4386	C	4312	C	4315	C	4392	C	4395	C
140	IGS (trnK-UUU, rps16)	LSC	4397	T	4399	T	4413	T	4397	T	4323	T	4326	T	4403	A	4406	T
141	IGS (trnK-UUU, rps16)	LSC	4433	T	4435	T	4447	T	4433	T	4358	T	4361	T	4439	T	4412	A
142	IGS (trnK-UUU, rps16)	LSC	4437	G	4439	G	4451	G	4437	G	4362	G	4365	G	4443	G	4416	A
143	IGS (trnK-UUU, rps16)	LSC	4439	G	4441	G	4453	G	4439	G	4364	G	4367	G	4445	G	4418	A
144	IGS (trnK-UUU, rps16)	LSC	4440	A	4442	A	4454	A	4440	A	4365	A	4368	A	4446	A	4419	T
145	IGS (trnK-UUU, rps16)	LSC	4443	A	4445	A	4457	A	4443	A	4368	A	4371	A	4449	A	4422	T
146	IGS (trnK-UUU, rps16)	LSC	4444	G	4446	G	4458	G	4444	G	4369	G	4372	G	4450	G	4423	A
147	IGS (trnK-UUU, rps16)	LSC	4457	G	4459	G	4471	G	4457	G	4382	G	4385	G	4463	T	4436	G
148	IGS (trnK-UUU, rps16)	LSC	4464	G	4466	G	4478	G	4464	A	4389	G	4392	G	4470	G	4443	T
149	IGS (trnK-UUU, rps16)	LSC	4500	G	4502	G	4514	A	4500	G	4425	G	4428	G	4506	G	4479	G
150	IGS (trnK-UUU, rps16)	LSC	4506	A	4508	A	4520	A	4506	T	4431	A	4434	A	4512	A	4485	A
151	IGS (trnK-UUU, rps16)	LSC	4533	G	4536	G	4546	G	4533	G	4456	G	4459	G	4539	T	4509	G
152	IGS (trnK-UUU, rps16)	LSC	4586	A	4589	T	4599	T	4586	T	4509	T	4512	T	4592	T	4562	T
153	IGS (trnK-UUU, rps16)	LSC	4587	A	4590	C	4600	A	4587	A	4510	A	4513	A	4593	A	4563	A
154	IGS (trnK-UUU, rps16)	LSC	4592	A	4595	A	4605	A	4592	A	4515	A	4518	A	4598	A	4568	C
155	IGS (trnK-UUU, rps16)	LSC	4600	C	4603	T	4613	T	4600	C	4523	T	4532	T	4606	T	4570	A
156	IGS (trnK-UUU, rps16)	LSC	4604	G	4607	G	4617	A	4604	G	4527	G	4536	G	4610	G	4574	G
157	IGS (trnK-UUU, rps16)	LSC	4617	G	4620	A	4630	A	4617	A	4540	A	4549	A	4623	A	4587	A
158	IGS (trnK-UUU, rps16)	LSC	4629	G	4632	G	4642	G	4629	G	4552	G	4561	G	4635	G	4599	A
159	IGS (trnK-UUU, rps16)	LSC	4656	G	4659	G	4669	G	4656	G	4579	G	4588	G	4662	G	4626	A
160	IGS (trnK-UUU, rps16)	LSC	4671	G	4674	G	4684	G	4671	G	4594	G	4603	G	4677	C	4641	G
161	IGS (trnK-UUU, rps16)	LSC	4713	A	4713	A	4714	A	4713	A	4634	A	4645	A	4718	A	4682	G
162	IGS (trnK-UUU, rps16)	LSC	4727	G	4727	G	4728	G	4727	G	4648	G	4659	G	4732	G	4696	A
163	IGS (trnK-UUU, rps16)	LSC	4736	T	4736	T	4737	T	4736	T	4657	T	4668	T	4741	G	4705	T
164	IGS (trnK-UUU, rps16)	LSC	4754	A	4754	A	4756	A	4754	A	4675	A	4686	A	4746	A	4745	G
165	IGS (trnK-UUU, rps16)	LSC	4772	A	4772	A	4774	C	4772	A	4693	A	4704	A	4764	A	4763	A
166	IGS (trnK-UUU, rps16)	LSC	4798	G	4798	G	4800	G	4798	G	4719	G	4730	G	4790	G	4789	A
167	IGS (trnK-UUU, rps16)	LSC	4811	G	4811	T	4813	T	4811	T	4732	T	4743	C	4803	T	4802	T
168	IGS (trnK-UUU, rps16)	LSC	4896	C	4896	C	4898	C	4896	C	4817	C	4828	C	4887	A	4887	C
169	IGS (trnK-UUU, rps16)	LSC	4903	T	4903	T	4905	T	4903	T	4824	T	4835	G	4894	T	4894	T
170	IGS (trnK-UUU, rps16)	LSC	4904	T	4904	T	4906	T	4904	T	4825	T	4836	C	4895	T	4895	T
171	IGS (trnK-UUU, rps16)	LSC	4912	T	4912	T	4914	T	4912	T	4833	T	4844	T	4903	G	4903	T
172	IGS (trnK-UUU, rps16)	LSC	4952	T	4952	T	4954	T	4952	T	4873	T	4884	T	4943	G	4943	T
173	IGS (trnK-UUU, rps16)	LSC	4959	C	4959	C	4961	C	4959	C	4880	C	4891	C	4950	C	4950	A
174	IGS (trnK-UUU, rps16)	LSC	4960	C	4960	C	4962	C	4960	C	4881	C	4892	C	4951	C	4951	T
175	IGS (trnK-UUU, rps16)	LSC	4979	G	4979	G	4981	G	4979	G	4900	G	4911	G	4970	T	4970	G
176	IGS (trnK-UUU, rps16)	LSC	4990	G	4990	G	4992	G	4990	G	4911	G	4922	A	4981	G	4981	G
177	IGS (trnK-UUU, rps16)	LSC	5023	A	5023	G	5025	G	5023	G	4944	G	4955	G	5014	G	5014	A
178	IGS (trnK-UUU, rps16)	LSC	5038	A	5038	C	5040	A	5038	A	4959	A	4970	A	5029	A	5029	A
179	IGS (trnK-UUU, rps16)	LSC	5080	A	5063	A	5130	A	5080	A	5001	A	4995	A	5035	A	5055	G
180	IGS (trnK-UUU, rps16)	LSC	5081	G	5064	G	5131	G	5081	G	5002	G	4996	G	5036	G	5056	A
181	IGS (trnK-UUU, rps16)	LSC	5098	T	5081	T	5148	T	5098	T	5019	T	5013	G	5053	T	5073	T
182	IGS (trnK-UUU, rps16)	LSC	5111	C	5094	C	5161	C	5111	C	5032	C	5026	C	5066	T	5086	C
183	IGS (trnK-UUU, rps16)	LSC	5116	T	5099	T	5166	T	5116	T	5037	C	5031	T	5071	T	5091	T
184	IGS (trnK-UUU, rps16)	LSC	5145	C	5128	T	5195	C	5145	C	5066	T	5060	C	5103	C	5120	C
185	IGS (trnK-UUU, rps16)	LSC	5146	G	5129	G	5196	G	5146	G	5067	G	5061	G	5104	T	5121	G
186	rps16-exon 2	LSC	5247	A	5230	A	5297	A	5247	A	5168	A	5162	A	5205	A	5222	G
187	rps16-exon 2	LSC	5313	C	5296	T	5363	T	5313	C	5234	T	5228	T	5271	T	5288	T
188	rps16-intron 1	LSC	5461	G	5443	G	5510	A	5461	G	5381	G	5376	G	5419	G	5438	G
189	rps16-intron 1	LSC	5465	A	5447	A	5514	A	5465	A	5385	A	5380	C	5423	A	5442	A
190	rps16-intron 1	LSC	5477	A	5459	A	5526	G	5477	A	5397	A	5392	A	5435	A	5454	A
191	rps16-intron 1	LSC	5578	C	5561	C	5626	C	5578	C	5499	C	5493	A	5538	C	5556	C
192	rps16-intron 1	LSC	5624	G	5607	G	5672	G	5624	G	5545	G	5539	G	5584	G	5602	A
193	rps16-intron 1	LSC	5660	T	5643	G	5708	G	5660	G	5581	G	5575	G	5620	G	5638	T
194	rps16-intron 1	LSC	5670	T	5653	T	5718	T	5670	T	5591	T	5585	T	5630	T	5648	A
195	rps16-intron 1	LSC	5704	C	5687	C	5752	C	5704	C	5625	C	5619	C	5664	C	5682	T
196	rps16-intron 1	LSC	5794	C	5777	C	5842	C	5794	C	5715	C	5709	T	5754	C	5772	C
197	rps16-intron 1	LSC	5821	C	5804	C	5868	C	5821	C	5742	C	5735	C	5780	T	5799	C
198	rps16-intron 1	LSC	5838	A	5821	A	5885	A	5838	A	5759	A	5752	A	5797	A	5816	G
199	rps16-intron 1	LSC	5841	T	5824	C	5888	C	5841	T	5762	C	5755	C	5800	C	5819	C
200	rps16-intron 1	LSC	5927	T	5910	T	5974	C	5927	T	5848	T	5841	T	5886	T	5905	T
201	rps16-intron 1	LSC	5935	G	5918	A	5982	G	5935	G	5856	G	5849	G	5894	G	5913	G
202	rps16-intron 1	LSC	6013	G	5996	G	6062	G	6013	G	5934	G	5929	G	5972	A	5991	G
203	rps16-intron 1	LSC	6020	C	6003	A	6069	A	6020	C	5941	A	5936	A	5979	A	5998	A
204	rps16-intron 1	LSC	6068	A	6051	A	6117	G	6068	A	5989	A	5984	G	6027	A	6046	A
205	rps16-intron 1	LSC	6075	C	6058	C	6124	C	6075	C	5996	C	5991	C	6034	C	6053	T
206	rps16-intron 1	LSC	6087	G	6070	G	6136	G	6087	G	6008	G	6003	G	6046	A	6065	G
207	rps16-intron 1	LSC	6092	T	6076	T	6142	T	6092	T	6014	T	6009	T	6047	G	6070	T
208	rps16-intron 1	LSC	6116	G	6100	G	6166	G	6116	G	6038	G	6033	A	6071	G	6094	G
209	rps16-intron 1	LSC	6136	C	6120	C	6186	C	6136	C	6058	C	6053	C	6091	T	6114	C
210	rps16-intron 1	LSC	6156	T	6140	T	6206	T	6156	C	6078	T	6073	T	6111	T	6134	T
211	IGS (rps16, trnQ-UUG)	LSC	6249	T	6233	T	6299	G	6249	T	6171	T	6166	T	6204	T	6227	T
212	IGS (rps16, trnQ-UUG)	LSC	6320	T	6304	T	6370	T	6320	T	6242	T	6237	T	6275	T	6298	C
213	IGS (rps16, trnQ-UUG)	LSC	6324	C	6308	C	6374	C	6324	C	6246	C	6241	C	6279	C	6302	T
214	IGS (rps16, trnQ-UUG)	LSC	6328	C	6312	A	6378	A	6328	A	6250	A	6245	A	6283	A	6306	A
215	IGS (rps16, trnQ-UUG)	LSC	6364	C	6509	C	6576	C	6364	C	6446	C	6440	C	6479	C	6543	A
216	IGS (rps16, trnQ-UUG)	LSC	6372	G	6517	G	6584	G	6372	G	6454	G	6448	A	6487	G	6551	A
217	IGS (rps16, trnQ-UUG)	LSC	6390	A	6535	A	6602	A	6390	C	6472	A	6466	A	6505	A	6569	A
218	IGS (rps16, trnQ-UUG)	LSC	6398	C	6543	G	6610	G	6398	C	6480	G	6474	G	6513	C	6577	C
219	IGS (rps16, trnQ-UUG)	LSC	6400	G	6545	G	6612	G	6400	G	6482	G	6476	G	6515	A	6579	G
220	IGS (rps16, trnQ-UUG)	LSC	6411	A	6556	A	6623	A	6411	A	6493	A	6487	A	6526	A	6590	G
221	IGS (rps16, trnQ-UUG)	LSC	6413	T	6558	T	6625	T	6413	T	6495	T	6489	T	6528	T	6592	A
222	IGS (rps16, trnQ-UUG)	LSC	6586	T	6730	T	6788	T	6586	T	6659	T	6653	T	6573	T	6751	C
223	IGS (rps16, trnQ-UUG)	LSC	6589	A	6733	A	6791	A	6589	A	6662	A	6656	A	6576	A	6754	G
224	IGS (rps16, trnQ-UUG)	LSC	6611	C	6755	C	6813	C	6611	C	6684	C	6678	C	6598	A	6776	C
225	IGS (rps16, trnQ-UUG)	LSC	6638	C	6782	C	6840	C	6638	C	6711	C	6705	T	6625	C	6803	C
226	IGS (rps16, trnQ-UUG)	LSC	6648	T	6792	G	6850	G	6648	G	6721	G	6715	G	6635	G	6813	G
227	IGS (rps16, trnQ-UUG)	LSC	6667	C	6811	A	6869	A	6667	A	6740	A	6734	A	6654	T	6832	A
228	IGS (rps16, trnQ-UUG)	LSC	6673	T	6817	T	6875	T	6673	T	6746	T	6740	C	6660	T	6838	T
229	IGS (rps16, trnQ-UUG)	LSC	6680	T	6824	T	6882	T	6680	T	6753	T	6747	T	6667	T	6845	C
230	IGS (rps16, trnQ-UUG)	LSC	6681	C	6825	C	6883	C	6681	C	6754	C	6748	C	6668	T	6846	C
231	IGS (rps16, trnQ-UUG)	LSC	6704	A	6848	A	6906	A	6704	A	6777	G	6771	A	6691	A	6869	A
232	IGS (rps16, trnQ-UUG)	LSC	6718	T	6862	T	6920	T	6718	T	6791	T	6785	G	6705	T	6883	T
233	IGS (rps16, trnQ-UUG)	LSC	6772	T	6916	T	6974	T	6772	T	6845	T	6839	T	6759	T	6937	C
234	IGS (rps16, trnQ-UUG)	LSC	6799	G	6943	G	7001	G	6799	G	6872	G	6866	G	6786	G	6964	C
235	IGS (rps16, trnQ-UUG)	LSC	6814	G	6958	G	7016	G	6814	G	6887	G	6881	G	6801	G	6979	A
236	IGS (rps16, trnQ-UUG)	LSC	6885	C	7027	C	7063	C	6885	C	6956	C	6950	C	6871	C	7048	T
237	IGS (rps16, trnQ-UUG)	LSC	6887	C	7029	C	7065	C	6887	C	6958	C	6952	C	6873	A	7050	C
238	IGS (rps16, trnQ-UUG)	LSC	6892	G	7034	G	7070	G	6892	G	6963	G	6957	G	6878	G	7055	A
239	IGS (rps16, trnQ-UUG)	LSC	6908	G	7050	A	7086	A	6908	G	6979	A	6973	A	6894	A	7071	A
240	IGS (rps16, trnQ-UUG)	LSC	6917	A	7059	A	7095	A	6917	A	6983	A	6982	C	6903	A	7080	A
241	IGS (rps16, trnQ-UUG)	LSC	6940	T	7083	T	7118	T	6940	T	7006	T	7006	T	6927	C	7103	C
242	IGS (rps16, trnQ-UUG)	LSC	6965	C	7108	C	7143	C	6965	C	7031	C	7031	C	6952	C	7128	G
243	IGS (rps16, trnQ-UUG)	LSC	7069	C	7212	T	7247	C	7069	C	7135	T	7135	C	7056	C	7232	C
244	IGS (rps16, trnQ-UUG)	LSC	7072	C	7215	C	7250	C	7072	C	7138	G	7138	C	7059	C	7235	C
245	IGS (rps16, trnQ-UUG)	LSC	7086	G	7235	A	7270	A	7086	G	7158	A	7158	A	7073	G	7249	G
246	IGS (rps16, trnQ-UUG)	LSC	7091	G	7240	G	7275	T	7091	G	7163	G	7163	G	7078	G	7254	G
247	IGS (rps16, trnQ-UUG)	LSC	7125	T	7274	C	7309	C	7125	C	7197	C	7197	C	7112	C	7288	C
248	IGS (rps16, trnQ-UUG)	LSC	7127	G	7276	G	7311	G	7127	G	7199	G	7199	G	7114	G	7290	C
249	IGS (rps16, trnQ-UUG)	LSC	7135	C	7284	G	7319	G	7135	G	7207	G	7207	G	7122	G	7298	G
250	IGS (rps16, trnQ-UUG)	LSC	7558	T	7295	T	7719	T	7558	T	7603	T	7607	C	7548	T	7730	T
251	IGS (rps16, trnQ-UUG)	LSC	7559	A	7296	A	7720	A	7559	A	7604	A	7608	G	7549	A	7731	A
252	IGS (rps16, trnQ-UUG)	LSC	7560	T	7297	T	7721	T	7560	T	7605	T	7609	C	7550	T	7732	T
253	IGS (rps16, trnQ-UUG)	LSC	7561	G	7298	G	7722	G	7561	G	7606	G	7610	A	7551	G	7733	G
254	IGS (rps16, trnQ-UUG)	LSC	7568	A	7305	A	7729	A	7568	A	7613	A	7617	T	7558	A	7740	A
255	IGS (rps16, trnQ-UUG)	LSC	7577	A	7314	A	7738	A	7577	A	7622	A	7626	A	7567	T	7749	C
256	IGS (rps16, trnQ-UUG)	LSC	7587	A	7327	A	7748	C	7587	A	7632	A	7636	A	7577	A	7759	A
257	IGS (rps16, trnQ-UUG)	LSC	7598	C	7338	C	7759	C	7598	C	7643	C	7647	C	7588	T	7770	C
258	IGS (rps16, trnQ-UUG)	LSC	7611	T	7358	C	7779	C	7611	C	7671	C	7660	C	7601	C	7783	C
259	IGS (rps16, trnQ-UUG)	LSC	7619	G	7366	G	7787	G	7619	G	7679	G	7668	G	7609	A	7791	G
260	IGS (rps16, trnQ-UUG)	LSC	7634	G	7381	G	7802	G	7634	G	7694	G	7683	G	7624	G	7806	A
261	IGS (rps16, trnQ-UUG)	LSC	7652	C	7399	T	7820	T	7652	C	7712	T	7701	T	7642	T	7824	T
262	IGS (rps16, trnQ-UUG)	LSC	7678	C	7425	T	7846	T	7678	T	7738	T	7727	G	7668	T	7844	T
263	IGS (rps16, trnQ-UUG)	LSC	7679	A	7426	A	7847	A	7679	A	7739	A	7728	A	7669	G	7845	A
264	IGS (trnQ-UUG, psbK)	LSC	7759	C	7506	C	7927	C	7759	C	7819	C	7808	C	7749	C	7925	A
265	IGS (trnQ-UUG, psbK)	LSC	7765	T	7512	T	7933	G	7765	T	7825	T	7814	T	7755	T	7931	T
266	IGS (trnQ-UUG, psbK)	LSC	7766	A	7513	A	7934	A	7766	T	7826	A	7815	A	7756	A	7932	A
267	IGS (trnQ-UUG, psbK)	LSC	7777	A	7524	A	7945	A	7777	A	7837	A	7826	C	7767	A	7943	A
268	IGS (trnQ-UUG, psbK)	LSC	7826	A	7573	C	7994	A	7826	A	7886	A	7875	A	7816	A	7992	A
269	IGS (trnQ-UUG, psbK)	LSC	7833	T	7580	A	8001	A	7833	A	7893	A	7882	A	7823	A	7999	A
270	IGS (trnQ-UUG, psbK)	LSC	7838	C	7585	A	8006	A	7838	C	7898	A	7887	A	7828	A	8004	A
271	IGS (trnQ-UUG, psbK)	LSC	7852	G	7599	G	8020	G	7852	G	7912	G	7901	A	7842	G	8018	G
272	IGS (trnQ-UUG, psbK)	LSC	7853	G	7600	G	8021	G	7853	G	7913	G	7902	G	7843	G	8019	T
273	IGS (trnQ-UUG, psbK)	LSC	7862	G	7609	G	8030	G	7862	G	7922	G	7911	G	7852	G	8028	A
274	IGS (trnQ-UUG, psbK)	LSC	8007	G	7754	G	8175	T	8007	G	8067	G	8056	G	7997	G	8173	G
275	IGS (trnQ-UUG, psbK)	LSC	8019	T	7766	T	8187	C	8019	T	8079	T	8068	C	8009	T	8185	T
276	IGS (trnQ-UUG, psbK)	LSC	8028	C	7775	C	8196	C	8028	C	8088	C	8077	C	8018	C	8194	T
277	IGS (trnQ-UUG, psbK)	LSC	8029	T	7776	T	8197	T	8029	T	8089	C	8078	T	8019	T	8195	T
278	IGS (trnQ-UUG, psbK)	LSC	8035	C	7782	C	8203	C	8035	C	8095	C	8084	C	8025	C	8210	T
279	IGS (trnQ-UUG, psbK)	LSC	8036	C	7783	C	8204	C	8036	C	8096	C	8085	C	8026	G	8211	C
280	psbK	LSC	8151	C	7898	C	8319	C	8151	C	8211	C	8200	C	8141	C	8326	T
281	psbK	LSC	8227	C	7974	C	8395	C	8227	C	8287	T	8276	C	8217	C	8402	C
282	IGS (psbK, psbI)	LSC	8291	G	8038	G	8459	G	8291	G	8351	G	8340	G	8281	G	8466	A
283	IGS (psbK, psbI)	LSC	8306	A	8053	T	8474	A	8306	A	8366	A	8355	A	8296	A	8481	A
284	IGS (psbK, psbI)	LSC	8307	T	8054	T	8475	T	8307	T	8367	T	8356	C	8297	T	8482	T
285	IGS (psbK, psbI)	LSC	8327	C	8075	C	8496	C	8327	C	8388	C	8377	T	8319	C	8504	C
286	IGS (psbK, psbI)	LSC	8374	G	8122	T	8543	G	8374	G	8435	G	8419	G	8366	G	8551	G
287	IGS (psbK, psbI)	LSC	8390	T	8138	C	8559	T	8390	T	8451	C	8435	T	8382	T	8567	T
288	IGS (psbK, psbI)	LSC	8395	T	8143	T	8564	T	8395	T	8456	T	8440	T	8387	C	8572	T
289	IGS (psbK, psbI)	LSC	8403	G	8151	A	8572	G	8403	G	8464	G	8448	G	8395	G	8580	G
290	IGS (psbK, psbI)	LSC	8429	A	8185	G	8598	G	8429	A	8490	G	8474	G	8421	G	8606	G
291	IGS (psbK, psbI)	LSC	8433	T	8189	T	8602	T	8433	T	8494	T	8478	T	8425	C	8610	T
292	IGS (psbK, psbI)	LSC	8444	C	8200	C	8613	C	8444	C	8505	C	8489	C	8433	T	8621	C
293	IGS (psbK, psbI)	LSC	8465	A	8221	A	8634	A	8465	A	8531	A	8515	A	8460	A	8642	C
294	IGS (psbK, psbI)	LSC	8505	T	8261	T	8674	T	8505	T	8571	T	8555	T	8500	T	8682	G
295	IGS (psbK, psbI)	LSC	8506	A	8262	C	8675	C	8506	A	8572	A	8556	C	8501	C	8683	A
296	IGS (psbK, psbI)	LSC	8538	T	8294	T	8707	T	8538	T	8604	T	8588	G	8533	T	8715	T
297	IGS (psbK, psbI)	LSC	8539	C	8295	C	8708	C	8539	C	8605	C	8589	A	8534	C	8716	C
298	IGS (psbK, psbI)	LSC	8550	C	8306	C	8719	C	8550	C	8616	C	8600	C	8545	A	8727	A
299	IGS (psbK, psbI)	LSC	8552	T	8308	T	8721	T	8552	T	8618	T	8602	T	8547	G	8729	T
300	IGS (psbK, psbI)	LSC	8593	A	8349	A	8762	G	8593	A	8659	A	8643	A	8588	A	8770	A
301	IGS (psbK, psbI)	LSC	8595	T	8351	T	8764	T	8595	T	8661	T	8645	G	8590	T	8772	T
302	IGS (psbK, psbI)	LSC	8603	G	8359	G	8772	G	8603	G	8669	G	8653	G	8598	G	8780	C
303	IGS (psbK, psbI)	LSC	8615	C	8371	C	8784	C	8615	C	8681	C	8665	C	8610	C	8792	T
304	psbI	LSC	8683	C	8439	C	8852	C	8683	C	8749	C	8733	C	8678	C	8860	T
305	IGS (psbI, trnS-GCU)	LSC	8781	T	8537	T	8950	T	8781	T	8847	T	8831	T	8776	T	8958	G
306	IGS (psbI, trnS-GCU)	LSC	8784	G	8540	G	8953	G	8784	G	8850	G	8834	G	8779	G	8961	A
307	IGS (psbI, trnS-GCU)	LSC	8802	A	8558	C	8971	C	8802	A	8868	C	8852	C	8797	C	8979	C
308	IGS (psbI, trnS-GCU)	LSC	8804	G	8560	G	8973	A	8804	G	8870	G	8854	G	8799	G	8981	G
309	IGS (psbI, trnS-GCU)	LSC	8806	G	8562	G	8975	G	8806	G	8872	G	8856	G	8801	A	8983	G
310	IGS (psbI, trnS-GCU)	LSC	8885	C	8641	C	9054	C	8885	C	8951	C	8935	C	8880	C	9062	T
311	IGS (trnS-GCU, trnG-GCC)	LSC	9042	T	8798	G	9211	G	9042	T	9108	G	9092	G	9037	G	9219	G
312	IGS (trnS-GCU, trnG-GCC)	LSC	9079	G	8835	G	9248	G	9079	G	9145	G	9124	G	9074	G	9256	A
313	IGS (trnS-GCU, trnG-GCC)	LSC	9087	A	8843	A	9256	A	9087	A	9153	A	9132	G	9082	A	9264	A
314	IGS (trnS-GCU, trnG-GCC)	LSC	9092	C	8848	C	9261	C	9092	C	9158	C	9137	T	9087	C	9269	C
315	IGS (trnS-GCU, trnG-GCC)	LSC	9108	C	8852	C	9265	C	9108	C	9169	C	9141	C	9104	A	9273	C
316	IGS (trnS-GCU, trnG-GCC)	LSC	9110	T	8854	T	9267	T	9110	T	9171	T	9143	T	9106	A	9275	T
317	IGS (trnS-GCU, trnG-GCC)	LSC	9113	T	8857	T	9270	T	9113	T	9174	T	9146	T	9109	G	9278	T
318	IGS (trnS-GCU, trnG-GCC)	LSC	9117	A	8861	A	9274	G	9117	A	9178	A	9150	A	9113	A	9282	A
319	IGS (trnS-GCU, trnG-GCC)	LSC	9123	A	8867	A	9280	A	9123	A	9184	A	9156	A	9119	A	9288	C
320	IGS (trnS-GCU, trnG-GCC)	LSC	9126	G	8870	G	9283	G	9126	G	9187	G	9159	G	9122	G	9291	A
321	IGS (trnS-GCU, trnG-GCC)	LSC	9128	T	8872	T	9285	T	9128	T	9189	T	9161	T	9124	T	9299	G
322	IGS (trnS-GCU, trnG-GCC)	LSC	9138	T	8882	T	9295	T	9138	T	9199	T	9171	T	9134	G	9309	T
323	IGS (trnS-GCU, trnG-GCC)	LSC	9156	T	8900	C	9313	C	9156	C	9217	C	9189	C	9152	C	9327	C
324	IGS (trnS-GCU, trnG-GCC)	LSC	9200	T	8950	A	9357	T	9200	T	9265	A	9233	T	9196	T	9371	T
325	IGS (trnS-GCU, trnG-GCC)	LSC	9229	A	8978	A	9385	A	9229	A	9293	A	9261	A	9225	G	9399	A
326	IGS (trnS-GCU, trnG-GCC)	LSC	9230	G	8979	G	9386	G	9230	A	9294	G	9262	G	9226	G	9400	G
327	IGS (trnS-GCU, trnG-GCC)	LSC	9231	G	8980	G	9387	G	9231	G	9295	G	9263	G	9227	C	9401	G
328	IGS (trnS-GCU, trnG-GCC)	LSC	9232	C	8981	C	9388	C	9232	G	9296	C	9264	C	9228	C	9402	C
329	IGS (trnS-GCU, trnG-GCC)	LSC	9234	T	8983	T	9390	T	9234	C	9298	T	9266	T	9230	T	9404	T
330	IGS (trnS-GCU, trnG-GCC)	LSC	9249	G	8998	G	9405	G	9249	G	9313	G	9281	G	9245	G	9419	C
331	IGS (trnS-GCU, trnG-GCC)	LSC	9265	G	9014	A	9421	G	9265	G	9329	G	9297	G	9261	G	9435	G
332	IGS (trnS-GCU, trnG-GCC)	LSC	9287	A	9036	G	9443	G	9287	A	9351	G	9319	G	9283	G	9457	G
333	IGS (trnS-GCU, trnG-GCC)	LSC	9318	C	9067	C	9474	C	9318	C	9382	C	9350	C	9314	G	9479	C
334	IGS (trnS-GCU, trnG-GCC)	LSC	9360	C	9109	C	9516	C	9360	C	9424	C	9392	C	9356	C	9521	A
335	IGS (trnS-GCU, trnG-GCC)	LSC	9377	A	9126	A	9533	A	9377	A	9441	T	9409	A	9373	A	9538	A
336	IGS (trnS-GCU, trnG-GCC)	LSC	9385	A	9134	C	9541	C	9385	C	9449	C	9417	C	9381	C	9546	A
337	IGS (trnS-GCU, trnG-GCC)	LSC	9392	G	9141	A	9548	A	9392	A	9456	A	9424	A	9388	A	9553	A
338	IGS (trnS-GCU, trnG-GCC)	LSC	9430	G	9179	G	9586	G	9430	G	9494	G	9462	G	9426	G	9591	A
339	IGS (trnS-GCU, trnG-GCC)	LSC	9461	G	9210	T	9617	T	9461	T	9525	T	9493	T	9457	T	9622	T
340	IGS (trnS-GCU, trnG-GCC)	LSC	9472	C	9221	C	9628	C	9472	C	9536	C	9504	C	9468	C	9633	T
341	IGS (trnS-GCU, trnG-GCC)	LSC	9502	G	9251	G	9658	G	9502	G	9566	G	9534	G	9498	G	9663	A
342	IGS (trnS-GCU, trnG-GCC)	LSC	9529	C	9278	C	9685	G	9529	C	9593	C	9561	G	9524	G	9689	G
343	IGS (trnS-GCU, trnG-GCC)	LSC	9558	T	9307	T	9714	G	9558	T	9622	T	9590	T	9553	T	9718	T
344	IGS (trnS-GCU, trnG-GCC)	LSC	9559	G	9308	G	9715	G	9559	G	9623	G	9591	G	9554	A	9719	G
345	IGS (trnS-GCU, trnG-GCC)	LSC	9852	A	9603	A	10009	A	9852	A	9915	A	9884	A	9848	A	9747	T
346	IGS (trnS-GCU, trnG-GCC)	LSC	9876	T	9627	T	10033	T	9876	T	9939	T	9908	T	9872	T	9771	G
347	IGS (trnS-GCU, trnG-GCC)	LSC	9903	G	9654	G	10060	G	9903	G	9966	G	9935	G	9899	G	9798	A
348	IGS (trnS-GCU, trnG-GCC)	LSC	9913	T	9664	T	10070	T	9913	T	9976	T	9945	G	9909	T	9808	T
349	IGS (trnS-GCU, trnG-GCC)	LSC	9926	C	9677	C	10083	C	9926	C	9989	C	9958	T	9922	C	9821	C
350	trnG-GCC-intron 1	LSC	10011	A	9762	A	10168	A	10011	A	10074	A	10043	A	10007	C	9906	A
351	trnG-GCC-intron 1	LSC	10026	A	9777	A	10183	A	10026	A	10089	A	10058	A	10022	A	9921	G
352	trnG-GCC-intron 1	LSC	10047	A	9798	A	10204	A	10047	A	10110	A	10079	A	10043	T	9942	A
353	trnG-GCC-intron 1	LSC	10134	T	9884	G	10290	T	10134	T	10196	T	10165	T	10129	T	10034	T
354	trnG-GCC-intron 1	LSC	10137	A	9887	A	10293	G	10137	A	10199	A	10168	A	10132	A	10037	A
355	trnG-GCC-intron 1	LSC	10138	T	9888	G	10294	G	10138	T	10200	G	10169	G	10133	T	10038	T
356	trnG-GCC-intron 1	LSC	10163	T	9913	T	10319	T	10163	T	10225	T	10194	T	10158	G	10063	T
357	trnG-GCC-intron 1	LSC	10267	G	10017	G	10423	G	10267	T	10329	G	10298	G	10262	G	10167	G
358	trnG-GCC-intron 1	LSC	10304	A	10054	A	10460	A	10304	A	10366	T	10335	A	10299	T	10204	A
359	trnG-GCC-intron 1	LSC	10378	A	10128	A	10534	G	10378	A	10440	A	10409	A	10373	A	10278	A
360	trnG-GCC-intron 1	LSC	10386	A	10136	A	10542	A	10386	A	10448	A	10417	A	10381	C	10286	A
361	trnG-GCC-intron 1	LSC	10466	T	10216	T	10622	T	10466	T	10528	T	10497	T	10461	T	10366	G
362	trnG-GCC-intron 1	LSC	10468	T	10218	T	10624	T	10468	T	10530	T	10499	T	10463	T	10368	G
363	trnG-GCC-intron 1	LSC	10477	G	10227	G	10633	G	10477	G	10539	G	10508	G	10472	T	10377	G
364	trnG-GCC-intron 1	LSC	10478	C	10228	C	10634	C	10478	C	10540	C	10509	C	10473	C	10378	T
365	trnG-GCC-intron 1	LSC	10543	G	10296	G	10699	G	10543	G	10606	G	10576	A	10537	G	10443	G
366	trnG-GCC-intron 1	LSC	10554	G	10307	A	10710	G	10554	G	10617	A	10587	G	10548	G	10454	G
367	trnG-GCC-intron 1	LSC	10563	T	10316	T	10719	T	10563	T	10626	T	10596	C	10557	T	10463	T
368	trnG-GCC-intron 1	LSC	10641	C	10394	C	10797	C	10641	C	10704	C	10674	C	10635	C	10541	T
369	trnG-GCC-intron 1	LSC	10643	A	10396	A	10799	A	10643	A	10706	A	10676	A	10637	G	10543	A
370	IGS (trnG-GCC, trnR-UCU)	LSC	10707	C	10460	A	10863	A	10707	C	10770	A	10740	A	10701	C	10607	C
371	IGS (trnG-GCC, trnR-UCU)	LSC	10731	A	10476	A	10879	A	10731	A	10786	A	10756	A	10717	C	10623	C
372	IGS (trnG-GCC, trnR-UCU)	LSC	10819	G	10564	A	10963	G	10819	G	10880	G	10844	G	10805	G	10662	G
373	IGS (trnG-GCC, trnR-UCU)	LSC	10821	A	10566	A	10965	A	10821	A	10882	A	10846	A	10807	C	10664	A
374	IGS (trnG-GCC, trnR-UCU)	LSC	10866	G	10611	G	11010	G	10866	G	10927	G	10891	G	10852	G	10709	A
375	IGS (trnG-GCC, trnR-UCU)	LSC	10890	T	10635	T	11034	T	10890	T	10951	T	10915	T	10876	A	10733	A
376	IGS (trnG-GCC, trnR-UCU)	LSC	10909	T	10653	T	11052	T	10909	T	10969	T	10933	T	10885	T	10760	A
377	IGS (trnG-GCC, trnR-UCU)	LSC	10910	C	10654	C	11053	C	10910	C	10970	C	10934	C	10886	C	10761	T
378	IGS (trnR-UCU, atpA)	LSC	10995	T	10739	T	11138	T	10995	T	11055	T	11019	T	10971	T	10846	A
379	IGS (trnR-UCU, atpA)	LSC	10998	T	10742	T	11141	G	10998	T	11058	T	11022	T	10974	T	10849	T
380	IGS (trnR-UCU, atpA)	LSC	11038	A	10775	A	11174	A	11038	A	11091	A	11055	A	11007	A	10874	C
381	IGS (trnR-UCU, atpA)	LSC	11055	G	10792	G	11191	G	11055	G	11108	G	11072	G	11024	G	10891	T
382	IGS (trnR-UCU, atpA)	LSC	11069	C	10806	A	11205	C	11069	C	11122	C	11086	C	11038	C	10905	C
383	IGS (trnR-UCU, atpA)	LSC	11071	G	10808	G	11207	G	11071	G	11124	G	11088	G	11040	A	10907	G
384	IGS (trnR-UCU, atpA)	LSC	11095	A	10832	T	11231	T	11095	T	11148	T	11112	T	11064	T	10931	T
385	IGS (trnR-UCU, atpA)	LSC	11096	T	10833	A	11232	A	11096	A	11149	A	11113	A	11065	A	10932	A
386	IGS (trnR-UCU, atpA)	LSC	11102	T	10839	T	11238	T	11102	A	11155	T	11119	T	11071	T	10938	T
387	IGS (trnR-UCU, atpA)	LSC	11103	T	10840	T	11239	G	11103	T	11156	T	11120	T	11072	T	10939	T
388	IGS (trnR-UCU, atpA)	LSC	11135	A	10871	A	11271	A	11135	A	11188	A	11152	A	11105	A	10975	C
389	atpA	LSC	11229	G	10965	G	11363	G	11229	G	11282	G	11246	G	11199	A	11069	G
390	atpA	LSC	11241	C	10977	C	11375	C	11241	C	11294	C	11258	T	11211	C	11081	C
391	atpA	LSC	11423	T	11159	G	11557	G	11423	T	11476	G	11440	G	11393	T	11263	T
392	atpA	LSC	11556	T	11292	T	11690	T	11556	G	11609	T	11573	T	11526	T	11396	T
393	atpA	LSC	11565	C	11301	C	11699	C	11565	C	11618	C	11582	C	11535	C	11405	T
394	atpA	LSC	11589	A	11325	A	11723	A	11589	A	11642	A	11606	A	11559	G	11429	A
395	atpA	LSC	11658	T	11394	A	11792	A	11658	T	11711	A	11675	A	11628	A	11498	A
396	atpA	LSC	11718	G	11454	G	11852	G	11718	G	11771	G	11735	A	11688	G	11558	G
397	atpA	LSC	11745	C	11481	C	11879	C	11745	C	11798	C	11762	C	11715	C	11585	T
398	atpA	LSC	11763	G	11499	G	11897	G	11763	G	11816	G	11780	A	11733	G	11603	G
399	atpA	LSC	11849	G	11585	A	11983	A	11849	A	11902	A	11866	A	11819	A	11689	A
400	atpA	LSC	12003	T	11739	G	12137	T	12003	T	12056	T	12020	T	11973	T	11843	T
401	atpA	LSC	12018	G	11754	A	12152	G	12018	G	12071	G	12035	G	11988	G	11858	G
402	atpA	LSC	12057	C	11793	C	12191	T	12057	C	12110	C	12074	C	12027	C	11897	C
403	atpA	LSC	12099	A	11835	C	12233	C	12099	C	12152	C	12116	C	12069	C	11939	C
404	atpA	LSC	12216	G	11952	G	12350	G	12216	G	12269	G	12233	G	12186	G	12056	A
405	atpA	LSC	12234	T	11970	T	12368	T	12234	T	12287	T	12251	T	12204	T	12074	G
406	atpA	LSC	12330	A	12066	A	12464	A	12330	A	12383	A	12347	G	12300	A	12170	A
407	atpA	LSC	12347	G	12083	G	12481	G	12347	G	12400	G	12364	G	12317	G	12187	T
408	atpA	LSC	12618	A	12354	A	12752	A	12618	A	12671	A	12635	A	12588	A	12458	G
409	atpA	LSC	12624	T	12360	T	12758	G	12624	T	12677	T	12641	T	12594	T	12464	T
410	IGS (atpA, atpF)	LSC	12742	C	12478	T	12876	T	12742	T	12795	T	12759	T	12712	T	12582	T
411	atpF-exon 2	LSC	12895	C	12632	C	13035	C	12895	C	12948	C	12913	C	12874	C	12737	T
412	atpF-exon 2	LSC	12933	T	12670	T	13073	T	12933	T	12986	T	12951	T	12912	G	12775	T
413	atpF-exon 2	LSC	12958	T	12695	G	13098	G	12958	G	13011	G	12976	G	12937	G	12800	G
414	atpF-exon 2	LSC	12986	T	12723	C	13126	C	12986	T	13039	C	13004	C	12965	T	12828	T
415	atpF-exon 2	LSC	13082	C	12819	C	13222	C	13082	C	13135	C	13100	C	13061	C	12924	T
416	atpF-exon 2	LSC	13130	C	12867	C	13270	C	13130	C	13183	T	13148	C	13109	C	12972	C
417	atpF-exon 2	LSC	13131	C	12868	C	13271	C	13131	C	13184	C	13149	C	13110	C	12973	T
418	atpF-exon 2	LSC	13161	T	12898	T	13301	T	13161	T	13214	T	13179	T	13140	T	13003	G
419	atpF-intron 1	LSC	13217	T	12954	T	13357	T	13217	T	13270	T	13235	T	13196	T	13059	G
420	atpF-intron 1	LSC	13262	A	12999	G	13402	A	13262	A	13315	A	13280	A	13241	A	13104	A
421	atpF-intron 1	LSC	13307	G	13044	G	13447	G	13307	G	13360	G	13325	G	13286	G	13149	C
422	atpF-intron 1	LSC	13311	T	13048	T	13451	T	13311	T	13364	T	13329	T	13290	T	13153	G
423	atpF-intron 1	LSC	13355	C	13092	G	13495	G	13355	C	13407	G	13373	G	13335	G	13197	G
424	atpF-intron 1	LSC	13366	C	13103	C	13506	T	13366	C	13418	C	13384	C	13346	C	13208	C
425	atpF-intron 1	LSC	13390	C	13127	C	13530	C	13390	C	13442	C	13408	C	13370	C	13232	T
426	atpF-intron 1	LSC	13400	G	13137	G	13540	G	13400	G	13452	G	13418	A	13380	G	13242	G
427	atpF-intron 1	LSC	13409	T	13146	T	13549	T	13409	T	13461	C	13427	T	13389	T	13251	T
428	atpF-intron 1	LSC	13414	T	13151	G	13554	G	13414	G	13466	G	13432	G	13394	G	13256	G
429	atpF-intron 1	LSC	13445	G	13182	G	13585	G	13445	G	13497	G	13463	G	13425	G	13286	A
430	atpF-intron 1	LSC	13476	C	13213	C	13616	A	13476	C	13528	C	13495	C	13457	C	13317	C
431	atpF-intron 1	LSC	13493	G	13230	G	13633	G	13493	G	13545	G	13512	G	13474	G	13334	C
432	atpF-intron 1	LSC	13500	A	13237	A	13640	A	13500	A	13552	A	13519	G	13481	A	13341	A
433	atpF-intron 1	LSC	13559	A	13296	C	13699	C	13559	C	13611	C	13578	C	13540	C	13400	C
434	atpF-intron 1	LSC	13577	A	13314	C	13717	C	13577	A	13629	C	13596	C	13558	C	13418	A
435	atpF-intron 1	LSC	13613	G	13350	G	13753	G	13613	G	13665	G	13632	G	13594	G	13454	T
436	atpF-intron 1	LSC	13744	A	13481	A	13884	A	13744	A	13796	A	13763	A	13725	C	13585	A
437	atpF-intron 1	LSC	13789	C	13526	C	13929	C	13789	C	13841	C	13808	C	13770	C	13630	A
438	atpF-intron 1	LSC	13818	C	13555	C	13958	C	13818	C	13870	C	13837	C	13799	C	13659	A
439	atpF-intron 1	LSC	13824	C	13561	C	13964	C	13824	C	13876	C	13843	C	13805	T	13665	C
440	atpF-intron 1	LSC	13839	C	13576	G	13979	C	13839	C	13891	C	13858	C	13820	C	13680	C
441	atpF-intron 1	LSC	13845	C	13582	T	13985	T	13845	C	13897	T	13864	T	13826	C	13686	C
442	atpF-intron 1	LSC	13846	C	13583	G	13986	C	13846	C	13898	C	13865	C	13827	C	13687	C
443	atpF-intron 1	LSC	13848	C	13585	C	13988	T	13848	C	13900	C	13867	C	13829	C	13689	C
444	atpF-intron 1	LSC	13859	C	13596	C	13999	C	13859	C	13911	C	13882	G	13840	C	13700	C
445	atpF-intron 1	LSC	13875	T	13612	T	14015	T	13875	T	13927	T	13898	C	13856	T	13716	T
446	atpF-intron 1	LSC	13877	G	13614	G	14017	G	13877	G	13929	G	13900	G	13858	G	13718	C
447	atpF-exon 1	LSC	13945	T	13682	C	14085	C	13945	C	13997	C	13968	C	13926	C	13786	C
448	atpF-exon 1	LSC	13951	A	13688	A	14091	A	13951	A	14003	A	13974	A	13932	A	13792	G
449	IGS (atpF, atpH)	LSC	14109	C	13846	C	14249	C	14109	C	14161	C	14132	T	14090	C	13950	C
450	IGS (atpF, atpH)	LSC	14129	T	13866	T	14269	T	14129	T	14181	T	14152	G	14110	T	13970	T
451	IGS (atpF, atpH)	LSC	14145	C	13882	T	14285	T	14145	T	14197	T	14168	T	14126	G	13986	T
452	IGS (atpF, atpH)	LSC	14183	G	13920	G	14323	G	14183	G	14235	G	14206	G	14164	G	14031	A
453	IGS (atpF, atpH)	LSC	14202	G	13941	A	14341	A	14202	A	14253	A	14225	A	14184	A	14055	A
454	IGS (atpF, atpH)	LSC	14212	T	13951	T	14351	C	14212	T	14263	T	14235	T	14194	T	14065	T
455	IGS (atpF, atpH)	LSC	14266	C	14005	C	14405	T	14266	C	14317	C	14289	C	14248	C	14119	C
456	IGS (atpF, atpH)	LSC	14298	A	14037	A	14437	A	14298	A	14349	A	14321	A	14280	G	14151	A
457	IGS (atpF, atpH)	LSC	14323	A	14062	A	14462	A	14323	C	14374	A	14346	A	14305	A	14176	A
458	IGS (atpF, atpH)	LSC	14347	C	14086	C	14486	A	14347	C	14398	C	14370	C	14329	C	14200	C
459	IGS (atpF, atpH)	LSC	14395	G	14134	G	14534	G	14395	G	14446	G	14418	G	14377	G	14248	A
460	IGS (atpF, atpH)	LSC	14446	A	14185	A	14585	A	14446	A	14497	A	14469	A	14428	A	14299	G
461	IGS (atpF, atpH)	LSC	14456	T	14195	C	14595	C	14456	T	14507	C	14479	C	14438	C	14309	C
462	IGS (atpF, atpH)	LSC	14475	T	14214	T	14614	T	14475	T	14526	T	14498	T	14457	A	14328	T
463	IGS (atpF, atpH)	LSC	14482	T	14221	T	14621	T	14482	T	14533	T	14505	T	14464	A	14335	T
464	IGS (atpF, atpH)	LSC	14483	T	14222	T	14622	T	14483	T	14534	T	14506	T	14465	A	14336	T
465	IGS (atpF, atpH)	LSC	14484	G	14223	G	14623	G	14484	G	14535	G	14507	G	14466	A	14337	G
466	IGS (atpF, atpH)	LSC	14490	T	14229	A	14629	A	14490	A	14541	A	14513	A	14472	A	14343	A
467	IGS (atpF, atpH)	LSC	14494	T	14233	A	14633	A	14494	T	14545	A	14517	A	14477	A	14347	A
468	atpH	LSC	14601	G	14340	G	14740	G	14601	G	14652	G	14624	A	14584	G	14454	G
469	atpH	LSC	14635	A	14374	A	14774	A	14635	A	14686	A	14658	G	14618	A	14488	A
470	atpH	LSC	14689	T	14428	T	14828	T	14689	T	14740	T	14712	T	14672	T	14542	C
471	atpH	LSC	14752	C	14491	C	14891	C	14752	C	14803	C	14775	C	14735	A	14605	C
472	IGS (atpH, atpI)	LSC	14822	A	14561	A	14961	A	14822	A	14873	A	14846	A	14805	A	14675	C
473	IGS (atpH, atpI)	LSC	14825	A	14564	A	14964	A	14825	A	14876	A	14849	A	14808	A	14678	G
474	IGS (atpH, atpI)	LSC	14826	T	14565	C	14965	C	14826	C	14877	C	14850	C	14809	C	14679	C
475	IGS (atpH, atpI)	LSC	14856	A	14595	A	14995	A	14856	A	14907	A	14880	A	14839	A	14709	C
476	IGS (atpH, atpI)	LSC	14859	G	14598	T	14998	T	14859	T	14910	T	14883	T	14842	T	14712	T
477	IGS (atpH, atpI)	LSC	14869	G	14608	G	15008	G	14869	G	14920	G	14893	G	14852	G	14722	C
478	IGS (atpH, atpI)	LSC	14895	C	14634	C	15034	C	14895	C	14946	C	14919	T	14878	C	14748	C
479	IGS (atpH, atpI)	LSC	14898	C	14637	A	15037	C	14898	C	14949	C	14922	C	14881	C	14751	C
480	IGS (atpH, atpI)	LSC	14900	G	14639	G	15039	G	14900	G	14951	A	14924	G	14883	G	14753	G
481	IGS (atpH, atpI)	LSC	14906	C	14645	T	15045	T	14906	C	14957	T	14930	T	14889	C	14759	C
482	IGS (atpH, atpI)	LSC	14923	T	14662	T	15062	T	14923	T	14974	T	14947	T	14906	G	14776	T
483	IGS (atpH, atpI)	LSC	14940	G	14679	G	15079	G	14940	G	14991	C	14964	G	14923	G	14793	G
484	IGS (atpH, atpI)	LSC	14957	G	14696	G	15096	G	14957	G	15002	G	14981	G	14934	G	14804	A
485	IGS (atpH, atpI)	LSC	14962	A	14701	C	15101	C	14962	C	15007	C	14986	C	14939	C	14809	C
486	IGS (atpH, atpI)	LSC	14993	C	14732	C	15132	C	14993	C	15038	C	15017	C	14970	C	14840	A
487	IGS (atpH, atpI)	LSC	14994	T	14733	T	15133	T	14994	T	15039	T	15018	T	14971	T	14841	C
488	IGS (atpH, atpI)	LSC	15007	G	14746	G	15146	G	15007	G	15052	G	15031	G	14984	T	14854	G
489	IGS (atpH, atpI)	LSC	15033	G	14772	G	15172	G	15033	G	15078	G	15057	G	15010	G	14880	T
490	IGS (atpH, atpI)	LSC	15039	C	14778	C	15178	C	15039	C	15084	C	15063	C	15016	C	14886	A
491	IGS (atpH, atpI)	LSC	15043	T	14782	T	15182	T	15043	T	15088	T	15067	T	15020	T	14890	C
492	IGS (atpH, atpI)	LSC	15078	G	14817	G	15217	A	15078	G	15123	G	15102	A	15055	G	14925	G
493	IGS (atpH, atpI)	LSC	15118	C	14857	C	15257	C	15118	C	15163	C	15142	C	15095	G	14965	G
494	IGS (atpH, atpI)	LSC	15120	A	14859	A	15259	A	15120	A	15165	A	15144	G	15097	A	14967	A
495	IGS (atpH, atpI)	LSC	15129	T	14868	T	15268	T	15129	T	15174	T	15153	T	15106	T	14976	A
496	IGS (atpH, atpI)	LSC	15131	G	14870	G	15270	G	15131	G	15176	G	15155	G	15108	G	14978	A
497	IGS (atpH, atpI)	LSC	15178	G	14917	G	15317	G	15178	G	15223	G	15202	A	15155	G	15025	G
498	IGS (atpH, atpI)	LSC	15181	T	14920	T	15320	T	15181	T	15226	T	15205	T	15158	T	15028	C
499	IGS (atpH, atpI)	LSC	15200	C	14939	C	15339	C	15200	A	15245	C	15224	C	15177	C	15047	C
500	IGS (atpH, atpI)	LSC	15272	G	15011	G	15410	G	15272	G	15317	G	15296	G	15249	G	15118	T
501	IGS (atpH, atpI)	LSC	15274	C	15013	C	15412	C	15274	C	15319	C	15298	C	15251	C	15120	T
502	IGS (atpH, atpI)	LSC	15284	C	15023	C	15422	T	15284	C	15329	C	15308	C	15261	C	15130	C
503	IGS (atpH, atpI)	LSC	15309	C	15048	C	15447	C	15309	C	15354	C	15333	C	15278	A	15155	C
504	IGS (atpH, atpI)	LSC	15381	A	15120	A	15519	A	15381	A	15426	A	15405	A	15350	A	15232	G
505	IGS (atpH, atpI)	LSC	15439	A	15178	A	15577	A	15439	A	15484	C	15463	A	15408	A	15290	A
506	IGS (atpH, atpI)	LSC	15476	T	15215	A	15614	A	15476	T	15521	A	15500	A	15445	T	15327	T
507	IGS (atpH, atpI)	LSC	15477	A	15216	T	15615	T	15477	T	15522	T	15501	T	15446	T	15328	T
508	IGS (atpH, atpI)	LSC	15526	G	15265	G	15664	G	15526	G	15571	G	15550	C	15495	G	15377	G
509	IGS (atpH, atpI)	LSC	15538	G	15277	A	15676	A	15538	G	15583	A	15562	A	15507	A	15389	A
510	IGS (atpH, atpI)	LSC	15539	T	15278	C	15677	C	15539	T	15584	C	15563	C	15508	T	15390	T
511	IGS (atpH, atpI)	LSC	15601	A	15362	A	15761	A	15601	A	15668	A	15647	A	15592	C	15474	A
512	IGS (atpH, atpI)	LSC	15613	T	15374	T	15773	T	15613	T	15680	T	15659	T	15604	T	15486	G
513	IGS (atpH, atpI)	LSC	15641	A	15402	A	15801	A	15641	A	15708	A	15687	A	15632	A	15507	C
514	IGS (atpH, atpI)	LSC	15648	G	15409	G	15808	G	15648	G	15715	G	15694	G	15639	T	15514	G
515	IGS (atpH, atpI)	LSC	15660	C	15421	C	15820	C	15660	A	15727	C	15706	C	15651	C	15526	C
516	IGS (atpH, atpI)	LSC	15666	T	15427	C	15826	T	15666	T	15733	T	15712	T	15657	C	15532	C
517	IGS (atpH, atpI)	LSC	15667	C	15428	A	15827	A	15667	C	15734	A	15713	A	15658	A	15533	A
518	IGS (atpH, atpI)	LSC	15668	C	15429	A	15828	A	15668	C	15735	A	15714	A	15659	A	15534	A
519	IGS (atpH, atpI)	LSC	15673	T	15434	G	15833	T	15673	T	15740	T	15719	T	15664	T	15539	T
520	IGS (atpH, atpI)	LSC	15718	G	15479	T	15879	T	15718	T	15785	T	15763	T	15709	T	15584	T
521	IGS (atpH, atpI)	LSC	15720	C	15481	C	15881	C	15720	C	15787	C	15765	C	15711	C	15586	G
522	IGS (atpH, atpI)	LSC	15766	T	15527	T	15927	T	15766	T	15833	C	15811	T	15757	T	15634	T
523	IGS (atpH, atpI)	LSC	15776	C	15537	C	15937	C	15776	C	15837	C	15821	C	15767	C	15644	T
524	IGS (atpH, atpI)	LSC	15805	C	15557	C	15957	T	15805	C	15857	C	15841	C	15796	T	15673	C
525	IGS (atpH, atpI)	LSC	15818	G	15570	A	15970	G	15818	G	15870	G	15854	G	15809	G	15686	G
526	IGS (atpH, atpI)	LSC	15819	G	15571	G	15971	G	15819	G	15871	G	15855	A	15810	G	15687	G
527	IGS (atpH, atpI)	LSC	15835	A	15586	C	15986	A	15835	A	15886	A	15872	A	15826	A	15702	A
528	atpI	LSC	15871	G	15622	G	16022	G	15871	G	15922	G	15908	G	15862	A	15738	G
529	atpI	LSC	15925	G	15676	G	16076	A	15925	G	15976	G	15962	G	15916	G	15792	G
530	atpI	LSC	15973	T	15724	T	16124	T	15973	T	16024	T	16010	G	15964	T	15840	T
531	atpI	LSC	16114	G	15865	A	16265	G	16114	G	16165	A	16151	G	16105	G	15981	G
532	atpI	LSC	16144	C	15895	C	16295	C	16144	C	16195	C	16181	T	16135	C	16011	C
533	atpI	LSC	16165	C	15916	C	16316	C	16165	C	16216	G	16202	C	16156	C	16032	T
534	atpI	LSC	16204	C	15955	C	16355	C	16204	C	16255	C	16241	C	16195	C	16071	T
535	atpI	LSC	16236	G	15987	G	16387	G	16236	G	16287	G	16273	G	16227	G	16103	C
536	atpI	LSC	16240	G	15991	G	16391	G	16240	G	16291	G	16277	G	16231	T	16107	T
537	atpI	LSC	16273	C	16024	C	16424	C	16273	T	16324	C	16310	C	16264	C	16140	C
538	atpI	LSC	16321	G	16072	A	16472	A	16321	G	16372	A	16358	A	16312	G	16188	G
539	atpI	LSC	16330	T	16081	T	16481	G	16330	T	16381	T	16367	T	16321	T	16197	T
540	atpI	LSC	16434	T	16185	T	16585	T	16434	T	16485	C	16471	T	16425	T	16301	T
541	atpI	LSC	16543	G	16294	G	16694	G	16543	A	16594	G	16580	G	16534	G	16410	G
542	IGS (atpI, rps2)	LSC	16600	G	16351	G	16751	G	16600	G	16651	G	16637	G	16591	A	16467	G
543	IGS (atpI, rps2)	LSC	16607	T	16358	G	16758	G	16607	G	16658	G	16644	G	16598	G	16474	G
544	IGS (atpI, rps2)	LSC	16668	T	16419	T	16819	T	16668	T	16719	T	16705	C	16659	T	16535	T
545	IGS (atpI, rps2)	LSC	16707	T	16458	A	16858	T	16707	T	16758	T	16744	T	16698	T	16574	T
546	IGS (atpI, rps2)	LSC	16745	G	16496	G	16896	G	16745	G	16796	G	16782	A	16736	G	16612	A
547	IGS (atpI, rps2)	LSC	16751	A	16502	A	16902	A	16751	A	16802	A	16788	A	16742	G	16618	A
548	IGS (atpI, rps2)	LSC	16768	C	16519	A	16919	C	16768	C	16819	C	16805	C	16759	A	16635	C
549	IGS (atpI, rps2)	LSC	16775	A	16526	A	16926	A	16775	A	16826	A	16812	A	16766	A	16642	C
550	rps2	LSC	16797	G	16548	G	16948	A	16797	G	16848	G	16834	G	16788	G	16664	G
551	rps2	LSC	16955	C	16706	C	17106	C	16955	C	17006	C	16992	C	16946	C	16822	T
552	rps2	LSC	17002	C	16753	C	17153	C	17002	G	17053	C	17039	C	16993	C	16869	C
553	rps2	LSC	17127	T	16878	T	17278	T	17127	T	17178	T	17164	T	17118	T	16994	C
554	rps2	LSC	17144	G	16895	G	17295	G	17144	G	17195	G	17181	G	17135	T	17011	G
555	rps2	LSC	17177	A	16928	A	17328	A	17177	A	17228	A	17214	A	17168	A	17044	C
556	rps2	LSC	17276	G	17027	T	17427	G	17276	G	17327	T	17313	G	17267	G	17143	G
557	rps2	LSC	17354	A	17105	A	17505	A	17354	A	17405	A	17391	A	17345	C	17221	A
558	IGS (rps2, rpoC2)	LSC	17543	A	17297	G	17692	A	17543	A	17596	G	17583	A	17536	A	17412	A
559	IGS (rps2, rpoC2)	LSC	17555	C	17309	T	17704	T	17555	C	17608	T	17595	T	17548	C	17424	C
560	IGS (rps2, rpoC2)	LSC	17625	T	17379	T	17774	C	17625	T	17678	T	17665	T	17618	T	17499	T
561	IGS (rps2, rpoC2)	LSC	17626	C	17380	G	17775	C	17626	C	17679	C	17666	C	17619	C	17500	C
562	IGS (rps2, rpoC2)	LSC	17627	C	17381	C	17776	T	17627	C	17680	C	17667	C	17620	C	17501	C
563	IGS (rps2, rpoC2)	LSC	17629	A	17383	A	17778	A	17629	C	17682	A	17669	A	17622	A	17503	A
564	IGS (rps2, rpoC2)	LSC	17653	T	17407	T	17802	T	17653	T	17706	T	17693	T	17646	T	17527	C
565	IGS (rps2, rpoC2)	LSC	17694	C	17448	C	17843	C	17694	C	17747	C	17734	C	17687	C	17568	T
566	IGS (rps2, rpoC2)	LSC	17697	A	17451	A	17846	A	17697	A	17750	A	17737	A	17690	A	17571	C
567	IGS (rps2, rpoC2)	LSC	17709	A	17466	A	17860	A	17709	A	17763	A	17752	A	17701	C	17584	A
568	IGS (rps2, rpoC2)	LSC	17738	C	17495	T	17889	T	17738	C	17792	T	17781	C	17730	T	17613	C
569	rpoC2	LSC	17784	A	17541	C	17935	C	17784	A	17838	C	17827	C	17776	A	17659	A
570	rpoC2	LSC	17799	C	17556	C	17950	C	17799	C	17853	C	17842	C	17791	T	17674	C
571	rpoC2	LSC	17801	A	17558	A	17952	A	17801	A	17855	A	17844	A	17793	A	17676	C
572	rpoC2	LSC	17808	A	17565	A	17959	A	17808	A	17862	A	17851	A	17800	G	17683	A
573	rpoC2	LSC	17846	C	17603	C	17997	C	17846	C	17900	C	17889	C	17838	C	17721	G
574	rpoC2	LSC	17978	C	17735	C	18129	C	17978	C	18032	C	18021	C	17970	C	17853	T
575	rpoC2	LSC	18026	G	17783	G	18177	G	18026	G	18080	G	18069	A	18018	G	17901	G
576	rpoC2	LSC	18068	C	17825	C	18219	C	18068	C	18122	C	18111	T	18060	C	17943	C
577	rpoC2	LSC	18079	T	17836	T	18230	T	18079	T	18133	T	18122	T	18071	T	17954	G
578	rpoC2	LSC	18097	T	17854	T	18248	T	18097	T	18151	T	18140	T	18089	T	17972	C
579	rpoC2	LSC	18098	G	17855	G	18249	G	18098	G	18152	G	18141	A	18090	G	17973	G
580	rpoC2	LSC	18122	C	17879	T	18273	C	18122	C	18176	T	18165	C	18114	C	17997	C
581	rpoC2	LSC	18263	C	18020	C	18414	C	18263	C	18317	C	18306	C	18255	T	18138	C
582	rpoC2	LSC	18287	C	18044	C	18438	C	18287	C	18341	C	18330	C	18279	C	18162	T
583	rpoC2	LSC	18407	T	18164	T	18558	G	18407	T	18461	T	18450	T	18399	T	18282	T
584	rpoC2	LSC	18443	T	18200	T	18594	T	18443	T	18497	T	18486	T	18435	T	18318	C
585	rpoC2	LSC	18473	C	18230	C	18624	C	18473	C	18527	C	18516	C	18465	T	18348	C
586	rpoC2	LSC	18488	A	18245	C	18639	C	18488	A	18542	C	18531	C	18480	A	18363	A
587	rpoC2	LSC	18497	T	18254	C	18648	T	18497	T	18551	C	18540	T	18489	T	18372	T
588	rpoC2	LSC	18521	T	18278	T	18672	T	18521	T	18575	T	18564	C	18513	T	18396	T
589	rpoC2	LSC	18537	A	18294	A	18688	A	18537	A	18591	A	18580	A	18529	C	18412	A
590	rpoC2	LSC	18616	C	18373	C	18767	C	18616	C	18670	C	18659	C	18608	C	18491	T
591	rpoC2	LSC	18641	T	18398	T	18792	T	18641	T	18695	T	18684	T	18633	A	18516	T
592	rpoC2	LSC	18649	G	18406	G	18800	G	18649	G	18703	G	18692	G	18641	A	18524	G
593	rpoC2	LSC	18657	T	18414	T	18808	T	18657	T	18711	T	18700	T	18649	T	18532	C
594	rpoC2	LSC	18712	T	18469	T	18863	T	18712	T	18766	T	18755	T	18704	G	18587	T
595	rpoC2	LSC	18722	C	18479	T	18873	T	18722	T	18776	T	18765	T	18714	T	18597	T
596	rpoC2	LSC	18742	G	18499	G	18893	G	18742	G	18796	G	18785	G	18734	T	18617	G
597	rpoC2	LSC	18755	C	18512	C	18906	C	18755	C	18809	C	18798	C	18747	A	18630	C
598	rpoC2	LSC	18789	G	18546	G	18940	G	18789	G	18843	G	18832	G	18781	G	18664	A
599	rpoC2	LSC	18811	C	18568	C	18962	C	18811	C	18865	C	18854	A	18803	C	18686	C
600	rpoC2	LSC	18852	T	18609	T	19003	T	18852	T	18906	T	18895	T	18844	C	18727	T
601	rpoC2	LSC	18857	A	18614	T	19008	T	18857	T	18911	T	18900	T	18849	T	18732	T
602	rpoC2	LSC	18881	A	18638	A	19032	A	18881	A	18935	A	18924	A	18873	A	18756	C
603	rpoC2	LSC	18946	C	18703	T	19097	C	18946	C	19000	T	18989	C	18938	C	18821	C
604	rpoC2	LSC	18984	G	18741	G	19135	A	18984	G	19038	G	19027	G	18976	G	18859	G
605	rpoC2	LSC	18989	G	18746	G	19140	A	18989	G	19043	G	19032	G	18981	G	18864	G
606	rpoC2	LSC	19013	C	18770	C	19164	C	19013	C	19067	C	19056	C	19005	A	18888	C
607	rpoC2	LSC	19041	G	18798	A	19192	G	19041	G	19095	A	19084	G	19033	G	18916	G
608	rpoC2	LSC	19094	A	18851	C	19245	C	19094	A	19148	C	19137	C	19086	C	18969	C
609	rpoC2	LSC	19130	A	18887	A	19281	A	19130	A	19184	A	19173	A	19122	C	19005	A
610	rpoC2	LSC	19188	T	18945	C	19339	C	19188	C	19242	C	19231	C	19180	C	19063	C
611	rpoC2	LSC	19214	A	18971	A	19365	A	19214	A	19268	A	19257	A	19206	T	19089	T
612	rpoC2	LSC	19250	T	19007	T	19401	T	19250	T	19304	C	19293	T	19242	T	19125	T
613	rpoC2	LSC	19256	C	19013	C	19407	C	19256	C	19310	C	19299	G	19248	C	19131	A
614	rpoC2	LSC	19288	C	19045	C	19439	C	19288	T	19342	C	19331	C	19280	C	19163	C
615	rpoC2	LSC	19339	C	19096	C	19490	C	19339	C	19393	C	19382	T	19331	C	19214	C
616	rpoC2	LSC	19343	C	19100	C	19494	T	19343	C	19397	C	19386	C	19335	C	19218	C
617	rpoC2	LSC	19499	C	19256	C	19650	C	19499	C	19553	C	19542	C	19491	T	19374	C
618	rpoC2	LSC	19500	T	19257	T	19651	T	19500	T	19554	T	19543	T	19492	G	19375	T
619	rpoC2	LSC	19532	C	19289	C	19683	C	19532	C	19586	T	19575	C	19524	C	19407	C
620	rpoC2	LSC	19575	T	19332	T	19726	C	19575	T	19629	T	19618	T	19567	T	19450	T
621	rpoC2	LSC	19634	G	19391	G	19785	G	19634	G	19688	G	19677	G	19626	G	19509	A
622	rpoC2	LSC	19641	A	19398	A	19792	T	19641	A	19695	A	19684	A	19633	T	19516	A
623	rpoC2	LSC	19648	C	19405	C	19799	C	19648	C	19702	C	19691	C	19640	G	19523	C
624	rpoC2	LSC	19650	G	19407	G	19801	G	19650	G	19704	G	19693	G	19642	G	19525	T
625	rpoC2	LSC	19762	C	19519	C	19913	C	19762	C	19816	C	19805	C	19754	A	19637	C
626	rpoC2	LSC	19810	T	19567	T	19961	T	19810	T	19864	T	19853	T	19802	C	19685	T
627	rpoC2	LSC	19880	G	19637	G	20031	A	19880	G	19934	G	19923	A	19872	A	19755	G
628	rpoC2	LSC	19896	T	19653	T	20047	T	19896	T	19950	T	19939	T	19888	T	19771	G
629	rpoC2	LSC	19913	G	19670	A	20064	G	19913	G	19967	A	19956	G	19905	G	19788	G
630	rpoC2	LSC	20057	A	19814	A	20208	C	20057	A	20111	A	20100	A	20049	A	19932	A
631	rpoC2	LSC	20064	C	19821	C	20215	C	20064	C	20118	C	20107	A	20056	C	19939	C
632	rpoC2	LSC	20066	G	19823	A	20217	G	20066	G	20120	G	20109	G	20058	G	19941	G
633	rpoC2	LSC	20072	A	19829	A	20223	A	20072	A	20126	A	20115	A	20064	A	19947	G
634	rpoC2	LSC	20196	T	19953	T	20347	A	20196	T	20250	T	20239	T	20188	T	20071	T
635	rpoC2	LSC	20208	A	19965	C	20359	A	20208	A	20262	A	20251	A	20200	A	20083	A
636	rpoC2	LSC	20279	C	20036	C	20430	C	20279	C	20333	A	20322	C	20271	C	20154	C
637	rpoC2	LSC	20351	A	20108	A	20502	A	20351	A	20405	A	20394	A	20343	C	20226	A
638	rpoC2	LSC	20352	G	20109	G	20503	G	20352	G	20406	G	20395	G	20344	A	20227	G
639	rpoC2	LSC	20424	T	20181	T	20575	T	20424	T	20478	T	20467	T	20416	T	20299	G
640	rpoC2	LSC	20435	C	20192	C	20586	C	20435	C	20489	C	20478	T	20427	C	20310	G
641	rpoC2	LSC	20444	T	20201	G	20595	C	20444	T	20498	T	20487	T	20436	T	20319	T
642	rpoC2	LSC	20504	A	20261	A	20655	G	20504	A	20558	A	20547	A	20496	A	20379	A
643	rpoC2	LSC	20576	C	20333	C	20727	C	20576	C	20630	C	20619	C	20568	C	20451	T
644	rpoC2	LSC	20603	C	20360	C	20754	C	20603	C	20657	C	20646	T	20595	C	20478	C
645	rpoC2	LSC	20615	A	20372	A	20766	G	20615	A	20669	A	20658	A	20607	A	20490	A
646	rpoC2	LSC	20630	T	20387	T	20781	C	20630	T	20684	T	20673	T	20622	T	20505	T
647	rpoC2	LSC	20647	C	20404	C	20798	C	20647	C	20701	C	20690	C	20639	T	20522	C
648	rpoC2	LSC	20675	T	20432	T	20826	T	20675	T	20729	T	20718	G	20667	T	20550	T
649	rpoC2	LSC	20798	T	20555	T	20949	T	20798	T	20852	T	20841	G	20790	T	20673	T
650	rpoC2	LSC	20827	A	20584	G	20978	G	20827	G	20881	G	20870	G	20819	G	20702	G
651	rpoC2	LSC	20840	C	20597	C	20991	C	20840	C	20894	C	20883	C	20832	T	20715	C
652	rpoC2	LSC	20891	T	20648	T	21042	A	20891	T	20945	T	20934	T	20883	T	20766	C
653	rpoC2	LSC	20924	T	20681	T	21075	T	20924	T	20978	T	20967	T	20916	A	20799	T
654	rpoC2	LSC	20933	C	20690	C	21084	C	20933	C	20987	C	20976	T	20925	C	20808	A
655	rpoC2	LSC	20966	C	20723	T	21117	C	20966	C	21020	T	21009	C	20958	C	20841	C
656	rpoC2	LSC	20996	C	20753	C	21147	C	20996	C	21050	C	21039	C	20988	C	20871	T
657	rpoC2	LSC	21026	A	20783	C	21177	C	21026	A	21080	C	21069	C	21018	A	20901	A
658	rpoC2	LSC	21047	G	20804	G	21198	G	21047	G	21101	G	21090	A	21039	G	20922	G
659	rpoC2	LSC	21107	T	20864	T	21258	T	21107	T	21161	T	21150	T	21099	T	20982	C
660	rpoC2	LSC	21109	G	20866	G	21260	G	21109	G	21163	G	21152	G	21101	G	20984	A
661	rpoC2	LSC	21206	T	20963	T	21357	T	21206	T	21260	T	21249	G	21198	T	21081	T
662	rpoC2	LSC	21212	G	20969	G	21363	G	21212	G	21266	G	21255	A	21204	G	21087	G
663	rpoC2	LSC	21323	A	21080	G	21474	G	21323	A	21377	G	21366	G	21315	G	21198	G
664	rpoC2	LSC	21326	T	21083	T	21477	T	21326	T	21380	T	21369	T	21318	C	21201	T
665	rpoC2	LSC	21545	C	21302	C	21696	C	21545	C	21599	C	21588	T	21537	C	21420	C
666	rpoC2	LSC	21599	C	21356	T	21750	C	21599	C	21653	C	21642	C	21591	C	21474	C
667	rpoC2	LSC	21638	C	21395	T	21789	T	21638	C	21692	T	21681	T	21630	C	21513	C
668	rpoC2	LSC	21680	A	21437	A	21831	A	21680	A	21734	A	21723	A	21672	T	21555	A
669	rpoC2	LSC	21758	A	21515	A	21909	A	21758	A	21812	A	21801	A	21750	A	21633	G
670	rpoC2	LSC	21779	T	21536	T	21930	T	21779	T	21833	T	21822	T	21771	G	21654	T
671	rpoC2	LSC	21833	A	21590	A	21984	A	21833	A	21887	A	21876	A	21825	G	21708	A
672	rpoC2	LSC	21862	T	21619	T	22013	T	21862	T	21916	T	21905	C	21854	T	21737	T
673	IGS (rpoC2, rpoC1)	LSC	21934	G	21691	G	22085	G	21934	G	21988	G	21977	G	21926	T	21809	G
674	rpoC1-exon 2	LSC	22056	A	21813	A	22207	A	22056	A	22110	A	22099	A	22048	G	21931	A
675	rpoC1-exon 2	LSC	22080	T	21837	T	22231	T	22080	T	22134	T	22123	T	22072	C	21955	T
676	rpoC1-exon 2	LSC	22109	G	21866	G	22260	G	22109	G	22163	G	22152	A	22101	G	21984	G
677	rpoC1-exon 2	LSC	22155	T	21912	T	22306	T	22155	T	22209	T	22198	T	22147	T	22030	C
678	rpoC1-exon 2	LSC	22344	A	22101	A	22495	A	22344	A	22398	A	22387	A	22336	C	22219	A
679	rpoC1-exon 2	LSC	22408	A	22165	G	22559	A	22408	A	22462	A	22451	A	22400	A	22277	A
680	rpoC1-exon 2	LSC	22414	C	22171	G	22565	C	22414	C	22468	G	22457	T	22406	C	22283	C
681	rpoC1-exon 2	LSC	22620	C	22377	C	22771	C	22620	C	22674	C	22663	C	22612	T	22489	C
682	rpoC1-exon 2	LSC	22647	A	22404	A	22798	A	22647	A	22701	A	22690	A	22639	A	22516	G
683	rpoC1-exon 2	LSC	22827	G	22584	G	22978	G	22827	G	22881	G	22870	G	22819	G	22696	T
684	rpoC1-exon 2	LSC	22905	C	22662	C	23056	C	22905	C	22959	C	22948	C	22897	C	22774	T
685	rpoC1-exon 2	LSC	22941	T	22698	T	23092	T	22941	T	22995	T	22984	T	22933	T	22810	A
686	rpoC1-exon 2	LSC	22956	C	22713	C	23107	C	22956	C	23010	T	22999	C	22948	C	22825	C
687	rpoC1-exon 2	LSC	23112	T	22869	T	23263	G	23112	T	23166	T	23155	T	23104	T	22981	T
688	rpoC1-exon 2	LSC	23184	A	22941	A	23335	A	23184	A	23238	A	23227	A	23176	A	23053	G
689	rpoC1-exon 2	LSC	23262	C	23019	C	23413	C	23262	C	23316	C	23305	C	23254	C	23131	T
690	rpoC1-exon 2	LSC	23310	T	23067	T	23461	T	23310	T	23364	C	23353	T	23302	T	23179	T
691	rpoC1-exon 2	LSC	23337	A	23094	A	23488	A	23337	A	23391	A	23380	A	23329	A	23206	C
692	rpoC1-exon 2	LSC	23421	C	23178	T	23572	T	23421	C	23475	T	23464	T	23413	T	23290	T
693	rpoC1-exon 2	LSC	23508	T	23265	T	23659	T	23508	T	23562	T	23551	T	23500	G	23377	T
694	rpoC1-exon 2	LSC	23514	C	23271	G	23665	G	23514	G	23568	G	23557	G	23506	G	23383	G
695	rpoC1-exon 2	LSC	23550	T	23307	T	23701	T	23550	A	23604	T	23593	T	23542	T	23419	C
696	rpoC1-exon 2	LSC	23631	G	23388	G	23782	G	23631	G	23685	G	23674	G	23623	A	23500	G
697	rpoC1-exon 2	LSC	23641	G	23398	G	23792	G	23641	G	23695	G	23684	G	23633	G	23510	A
698	rpoC1-intron 1	LSC	23676	T	23433	T	23827	T	23676	T	23730	T	23719	T	23668	C	23545	T
699	rpoC1-intron 1	LSC	23701	T	23458	A	23853	T	23701	T	23756	T	23745	T	23694	T	23571	T
700	rpoC1-intron 1	LSC	23828	G	23585	G	23980	G	23828	G	23883	G	23872	G	23821	T	23698	G
701	rpoC1-intron 1	LSC	23832	A	23589	A	23984	A	23832	A	23887	A	23876	G	23825	A	23702	A
702	rpoC1-intron 1	LSC	23834	G	23591	G	23986	G	23834	G	23889	G	23878	A	23827	G	23704	G
703	rpoC1-intron 1	LSC	23852	A	23609	A	24004	A	23852	A	23907	A	23896	C	23845	A	23722	A
704	rpoC1-intron 1	LSC	23912	G	23658	G	24053	G	23912	G	23956	G	23945	G	23905	G	23782	C
705	rpoC1-intron 1	LSC	23914	A	23660	A	24055	A	23914	A	23958	A	23947	A	23907	A	23784	G
706	rpoC1-intron 1	LSC	23940	C	23686	C	24081	C	23940	C	23984	C	23973	T	23933	C	23810	C
707	rpoC1-intron 1	LSC	23959	C	23705	C	24100	C	23959	C	24003	C	23992	T	23952	C	23829	C
708	rpoC1-intron 1	LSC	24058	G	23804	G	24199	G	24058	T	24102	G	24091	G	24051	G	23922	G
709	rpoC1-intron 1	LSC	24154	T	23900	T	24295	T	24154	T	24198	T	24187	T	24147	T	24018	G
710	rpoC1-intron 1	LSC	24171	G	23917	G	24312	G	24171	G	24215	T	24204	G	24164	G	24035	G
711	rpoC1-intron 1	LSC	24255	T	24001	T	24395	T	24255	T	24299	T	24289	T	24248	T	24120	G
712	rpoC1-intron 1	LSC	24276	C	24022	A	24416	C	24276	C	24320	C	24310	C	24269	C	24141	C
713	rpoC1-intron 1	LSC	24366	T	24112	G	24506	G	24366	G	24410	G	24400	G	24359	G	24231	G
714	rpoC1-intron 1	LSC	24379	C	24125	C	24519	C	24379	C	24423	T	24413	C	24372	C	24244	C
715	rpoC1-intron 1	LSC	24380	T	24126	C	24520	C	24380	C	24424	C	24414	C	24373	C	24245	T
716	rpoC1-exon 1	LSC	24497	T	24243	T	24637	T	24497	T	24541	T	24531	T	24490	C	24362	T
717	rpoC1-exon 1	LSC	24530	T	24276	T	24670	T	24530	T	24574	T	24564	T	24523	T	24395	C
718	rpoC1-exon 1	LSC	24587	T	24333	T	24727	T	24587	T	24631	T	24621	T	24580	T	24452	C
719	rpoC1-exon 1	LSC	24626	A	24372	A	24766	A	24626	A	24670	A	24660	A	24619	G	24491	A
720	rpoC1-exon 1	LSC	24632	T	24378	T	24772	T	24632	T	24676	T	24666	T	24625	G	24497	T
721	rpoC1-exon 1	LSC	24731	A	24477	A	24871	A	24731	A	24775	C	24765	A	24724	A	24596	A
722	rpoB	LSC	24925	C	24671	C	25065	T	24925	C	24969	C	24959	C	24918	C	24790	C
723	rpoB	LSC	25138	G	24884	G	25278	G	25138	G	25182	G	25172	G	25131	C	25003	G
724	rpoB	LSC	25315	A	25061	G	25455	G	25315	A	25359	G	25349	G	25308	G	25180	G
725	rpoB	LSC	25443	G	25189	G	25583	G	25443	G	25487	A	25477	G	25436	G	25308	G
726	rpoB	LSC	25519	G	25265	G	25659	G	25519	G	25563	G	25553	G	25512	G	25384	A
727	rpoB	LSC	25533	G	25279	G	25673	A	25533	G	25577	G	25567	G	25526	G	25398	G
728	rpoB	LSC	25579	G	25325	G	25719	G	25579	T	25623	G	25613	G	25572	G	25444	G
729	rpoB	LSC	25630	G	25376	G	25770	G	25630	G	25674	G	25664	G	25623	T	25495	G
730	rpoB	LSC	25708	C	25454	C	25848	C	25708	C	25752	C	25742	C	25701	T	25573	C
731	rpoB	LSC	25741	C	25487	C	25881	T	25741	C	25785	C	25775	C	25734	C	25606	C
732	rpoB	LSC	25803	T	25549	T	25943	G	25803	T	25847	T	25837	T	25796	T	25668	T
733	rpoB	LSC	25810	C	25556	C	25950	C	25810	G	25854	C	25844	C	25803	C	25675	C
734	rpoB	LSC	25843	C	25589	C	25983	C	25843	C	25887	T	25877	C	25836	C	25708	C
735	rpoB	LSC	25932	T	25678	T	26072	T	25932	T	25976	T	25966	T	25925	T	25797	C
736	rpoB	LSC	25952	T	25698	T	26092	T	25952	T	25996	C	25986	T	25945	T	25817	T
737	rpoB	LSC	26034	C	25780	C	26174	C	26034	C	26078	C	26068	C	26027	C	25899	T
738	rpoB	LSC	26109	C	25855	C	26249	C	26109	C	26153	C	26143	C	26102	C	25974	T
739	rpoB	LSC	26134	A	25880	A	26274	C	26134	A	26178	A	26168	A	26127	A	25999	A
740	rpoB	LSC	26140	G	25886	G	26280	G	26140	G	26184	G	26174	G	26133	G	26005	A
741	rpoB	LSC	26167	T	25913	T	26307	C	26167	T	26211	T	26201	T	26160	T	26032	T
742	rpoB	LSC	26178	C	25924	C	26318	C	26178	C	26222	C	26212	C	26171	C	26043	T
743	rpoB	LSC	26203	T	25949	T	26343	T	26203	T	26247	T	26237	G	26196	T	26068	T
744	rpoB	LSC	26242	G	25988	G	26382	G	26242	G	26286	G	26276	G	26235	G	26107	C
745	rpoB	LSC	26313	T	26059	T	26453	T	26313	T	26357	T	26347	T	26306	C	26178	T
746	rpoB	LSC	26321	C	26067	C	26461	C	26321	C	26365	C	26355	C	26314	C	26186	T
747	rpoB	LSC	26338	G	26084	G	26478	G	26338	G	26382	A	26372	G	26331	G	26203	G
748	rpoB	LSC	26491	G	26237	G	26631	G	26491	G	26535	G	26525	G	26484	A	26356	G
749	rpoB	LSC	26530	A	26276	A	26670	A	26530	A	26574	A	26564	G	26523	A	26395	A
750	rpoB	LSC	26620	A	26366	A	26760	A	26620	A	26664	A	26654	A	26613	A	26485	C
751	rpoB	LSC	26776	A	26522	A	26916	A	26776	A	26820	A	26810	A	26769	G	26641	A
752	rpoB	LSC	26854	A	26600	A	26994	A	26854	G	26898	A	26888	A	26847	A	26719	A
753	rpoB	LSC	26872	T	26618	T	27012	T	26872	T	26916	T	26906	C	26865	T	26737	T
754	rpoB	LSC	26916	G	26662	C	27056	G	26916	G	26960	G	26950	G	26909	G	26781	G
755	rpoB	LSC	26926	A	26672	A	27066	A	26926	A	26970	A	26960	A	26919	G	26791	A
756	rpoB	LSC	26965	G	26711	A	27105	G	26965	G	27009	G	26999	G	26958	G	26830	G
757	rpoB	LSC	27022	C	26768	C	27162	C	27022	C	27066	C	27056	T	27015	C	26887	C
758	rpoB	LSC	27068	A	26814	A	27208	G	27068	G	27112	G	27102	G	27061	G	26933	G
759	rpoB	LSC	27241	G	26987	G	27381	G	27241	G	27285	G	27275	G	27234	G	27106	A
760	rpoB	LSC	27246	G	26992	G	27386	G	27246	G	27290	G	27280	G	27239	G	27111	T
761	rpoB	LSC	27247	G	26993	G	27387	G	27247	G	27291	G	27281	G	27240	G	27112	T
762	rpoB	LSC	27262	A	27008	C	27402	C	27262	C	27306	C	27296	C	27255	C	27127	C
763	rpoB	LSC	27346	G	27092	G	27486	G	27346	G	27390	G	27380	G	27339	A	27211	G
764	rpoB	LSC	27360	C	27106	C	27500	C	27360	C	27404	C	27394	C	27353	C	27225	T
765	rpoB	LSC	27361	C	27107	C	27501	C	27361	C	27405	C	27395	C	27354	T	27226	C
766	rpoB	LSC	27442	G	27188	G	27582	G	27442	A	27486	G	27476	G	27435	G	27307	G
767	rpoB	LSC	27469	G	27215	C	27609	C	27469	C	27513	C	27503	C	27462	C	27334	C
768	rpoB	LSC	27505	C	27251	C	27645	T	27505	C	27549	C	27539	T	27498	C	27370	C
769	rpoB	LSC	27928	A	27674	A	28068	G	27928	A	27972	A	27962	A	27921	A	27793	A
770	rpoB	LSC	27937	G	27683	A	28077	A	27937	G	27981	A	27971	A	27930	A	27802	A
771	rpoB	LSC	27940	T	27686	T	28080	T	27940	T	27984	T	27974	T	27933	T	27805	G
772	rpoB	LSC	27941	G	27687	G	28081	G	27941	G	27985	G	27975	G	27934	G	27806	C
773	rpoB	LSC	27969	G	27715	G	28109	G	27969	G	28013	G	28003	G	27962	G	27834	A
774	rpoB	LSC	28033	A	27779	A	28173	A	28033	A	28077	T	28067	A	28026	A	27898	A
775	rpoB	LSC	28061	T	27807	G	28201	G	28061	T	28105	G	28095	G	28054	T	27926	T
776	IGS (rpoB, trnC-GCA)	LSC	28215	C	27961	G	28355	G	28215	C	28259	G	28249	G	28212	G	28080	G
777	IGS (rpoB, trnC-GCA)	LSC	28230	G	27976	A	28370	A	28230	G	28274	A	28264	A	28227	G	28095	G
778	IGS (rpoB, trnC-GCA)	LSC	28237	G	27983	G	28377	G	28237	A	28281	G	28271	G	28234	G	28102	G
779	IGS (rpoB, trnC-GCA)	LSC	28247	G	27993	G	28387	G	28247	T	28291	G	28281	G	28244	G	28112	G
780	IGS (rpoB, trnC-GCA)	LSC	28354	A	28110	A	28494	C	28354	C	28408	C	28397	C	28351	C	28206	C
781	IGS (rpoB, trnC-GCA)	LSC	28364	C	28120	C	28504	C	28364	C	28418	C	28407	C	28361	C	28216	G
782	IGS (rpoB, trnC-GCA)	LSC	28421	A	28177	C	28561	C	28421	C	28475	C	28464	C	28418	C	28273	C
783	IGS (rpoB, trnC-GCA)	LSC	28429	G	28185	G	28569	T	28429	G	28483	G	28472	G	28426	G	28281	G
784	IGS (rpoB, trnC-GCA)	LSC	28458	A	28214	A	28598	A	28458	A	28512	A	28501	G	28455	A	28310	A
785	IGS (rpoB, trnC-GCA)	LSC	28467	A	28223	A	28607	A	28467	A	28521	A	28510	A	28464	C	28319	A
786	IGS (rpoB, trnC-GCA)	LSC	28501	C	28257	C	28641	C	28501	C	28555	C	28543	C	28480	A	28355	C
787	IGS (rpoB, trnC-GCA)	LSC	28507	C	28263	T	28647	T	28507	T	28561	T	28549	T	28486	T	28361	T
788	IGS (rpoB, trnC-GCA)	LSC	28563	T	28319	T	28703	T	28563	T	28617	T	28605	T	28542	T	28417	G
789	IGS (rpoB, trnC-GCA)	LSC	28602	A	28358	A	28742	A	28602	A	28656	A	28644	A	28581	A	28447	C
790	IGS (rpoB, trnC-GCA)	LSC	28607	G	28363	G	28747	G	28607	G	28661	G	28649	G	28586	A	28452	G
791	IGS (rpoB, trnC-GCA)	LSC	28609	G	28365	A	28749	G	28609	G	28663	A	28651	G	28588	G	28454	G
792	IGS (rpoB, trnC-GCA)	LSC	28614	A	28370	A	28754	A	28614	A	28668	A	28656	A	28593	A	28459	T
793	IGS (rpoB, trnC-GCA)	LSC	28624	C	28380	T	28764	C	28624	C	28678	T	28666	C	28603	C	28469	C
794	IGS (rpoB, trnC-GCA)	LSC	28693	C	28449	C	28833	C	28693	C	28747	C	28735	C	28672	C	28538	T
795	IGS (rpoB, trnC-GCA)	LSC	28711	C	28467	C	28851	C	28711	C	28765	C	28753	C	28690	C	28556	G
796	IGS (rpoB, trnC-GCA)	LSC	28760	G	28516	G	28900	G	28760	G	28814	G	28802	G	28739	G	28605	C
797	IGS (rpoB, trnC-GCA)	LSC	28782	C	28538	C	28922	C	28782	C	28836	C	28824	T	28761	C	28627	C
798	IGS (rpoB, trnC-GCA)	LSC	28851	G	28594	G	28978	T	28851	G	28891	G	28880	T	28835	G	28710	G
799	IGS (rpoB, trnC-GCA)	LSC	28858	T	28601	G	28985	T	28858	T	28898	T	28887	T	28842	T	28717	T
800	IGS (rpoB, trnC-GCA)	LSC	28860	T	28603	G	28987	G	28860	T	28900	G	28889	G	28844	T	28719	T
801	IGS (rpoB, trnC-GCA)	LSC	28878	G	28621	G	29005	G	28878	G	28918	G	28907	A	28862	G	28737	G
802	IGS (rpoB, trnC-GCA)	LSC	28882	A	28625	A	29009	G	28882	A	28922	A	28911	A	28866	C	28741	A
803	IGS (rpoB, trnC-GCA)	LSC	28955	A	28698	G	29082	G	28955	A	28995	G	28984	G	28939	A	28814	A
804	IGS (rpoB, trnC-GCA)	LSC	28956	G	28699	G	29083	T	28956	G	28996	G	28985	G	28940	G	28815	G
805	IGS (rpoB, trnC-GCA)	LSC	28966	T	28709	G	29093	G	28966	G	29006	G	28995	G	28950	G	28825	G
806	IGS (rpoB, trnC-GCA)	LSC	28978	T	28721	T	29105	T	28978	T	29018	T	29007	T	28962	T	28837	C
807	IGS (rpoB, trnC-GCA)	LSC	29002	A	28745	A	29129	A	29002	A	29042	A	29031	A	28986	C	28861	A
808	IGS (rpoB, trnC-GCA)	LSC	29011	G	28754	G	29138	A	29011	G	29051	G	29040	G	28995	G	28870	G
809	IGS (rpoB, trnC-GCA)	LSC	29015	A	28758	G	29142	G	29015	A	29055	G	29044	G	28999	G	28874	G
810	IGS (rpoB, trnC-GCA)	LSC	29029	T	28772	G	29156	T	29029	T	29069	T	29058	T	29013	T	28888	C
811	IGS (rpoB, trnC-GCA)	LSC	29062	A	28805	A	29189	A	29062	A	29102	A	29091	C	29046	A	28921	A
812	IGS (rpoB, trnC-GCA)	LSC	29071	G	28814	G	29198	G	29071	G	29111	G	29100	A	29055	G	28930	G
813	IGS (rpoB, trnC-GCA)	LSC	29127	A	28871	A	29256	A	29127	A	29168	A	29159	A	29111	A	28985	G
814	IGS (rpoB, trnC-GCA)	LSC	29129	G	28873	G	29258	G	29129	G	29170	G	29161	G	29113	G	28987	A
815	trnC-GCA	LSC	29201	T	28945	T	29330	T	29201	T	29242	T	29233	T	29185	T	29058	C
816	IGS (trnC-GCA, petN)	LSC	29242	A	28986	A	29371	C	29242	A	29283	A	29274	C	29226	A	29099	A
817	IGS (trnC-GCA, petN)	LSC	29247	A	28991	C	29376	C	29247	C	29288	T	29279	C	29231	C	29104	C
818	IGS (trnC-GCA, petN)	LSC	29248	A	28992	A	29377	A	29248	C	29289	A	29280	A	29232	A	29105	A
819	IGS (trnC-GCA, petN)	LSC	29270	T	29014	T	29399	T	29270	T	29311	T	29302	T	29254	G	29127	T
820	IGS (trnC-GCA, petN)	LSC	29282	T	29026	C	29411	T	29282	T	29323	C	29314	T	29266	T	29139	T
821	IGS (trnC-GCA, petN)	LSC	29301	G	29045	G	29430	G	29301	G	29342	G	29333	A	29285	G	29158	G
822	IGS (trnC-GCA, petN)	LSC	29320	T	29064	T	29449	C	29320	T	29361	T	29352	T	29304	T	29172	T
823	IGS (trnC-GCA, petN)	LSC	29321	G	29065	G	29450	G	29321	G	29362	G	29353	G	29305	A	29173	G
824	IGS (trnC-GCA, petN)	LSC	29322	A	29066	A	29451	A	29322	A	29363	A	29354	A	29306	A	29174	G
825	IGS (trnC-GCA, petN)	LSC	29326	T	29070	T	29455	T	29326	T	29367	T	29358	T	29310	C	29178	T
826	IGS (trnC-GCA, petN)	LSC	29330	C	29074	C	29459	C	29330	C	29371	C	29362	C	29314	C	29182	G
827	IGS (trnC-GCA, petN)	LSC	29333	C	29077	C	29462	C	29333	C	29374	C	29365	C	29317	C	29185	T
828	IGS (trnC-GCA, petN)	LSC	29341	G	29085	G	29470	G	29341	G	29382	G	29373	G	29325	A	29193	G
829	IGS (trnC-GCA, petN)	LSC	29344	T	29088	T	29473	C	29344	T	29385	T	29376	T	29328	T	29196	T
830	IGS (trnC-GCA, petN)	LSC	29409	C	29153	C	29538	C	29409	C	29450	T	29441	C	29393	C	29261	C
831	IGS (trnC-GCA, petN)	LSC	29414	C	29158	C	29543	T	29414	C	29455	C	29446	C	29398	C	29266	C
832	IGS (trnC-GCA, petN)	LSC	29420	C	29164	C	29549	C	29420	C	29461	C	29452	T	29404	C	29272	C
833	IGS (trnC-GCA, petN)	LSC	29426	T	29170	T	29555	G	29426	T	29467	T	29458	G	29410	T	29278	T
834	IGS (trnC-GCA, petN)	LSC	29427	A	29171	A	29556	A	29427	A	29468	A	29459	A	29411	C	29279	A
835	IGS (trnC-GCA, petN)	LSC	29436	C	29180	T	29565	T	29436	T	29477	T	29468	T	29420	T	29288	T
836	IGS (trnC-GCA, petN)	LSC	29639	A	29380	A	29771	A	29639	A	29681	A	29671	A	29623	G	29491	A
837	IGS (trnC-GCA, petN)	LSC	29656	G	29397	G	29788	G	29656	G	29698	G	29688	G	29640	T	29508	G
838	IGS (trnC-GCA, petN)	LSC	29665	T	29406	T	29797	T	29665	A	29707	A	29697	T	29649	T	29517	T
839	IGS (trnC-GCA, petN)	LSC	29666	T	29407	T	29798	T	29666	A	29708	A	29698	T	29650	T	29518	T
840	IGS (trnC-GCA, petN)	LSC	29667	T	29408	T	29799	T	29667	A	29709	A	29699	T	29651	T	29519	T
841	IGS (trnC-GCA, petN)	LSC	29672	C	29413	C	29804	C	29672	C	29714	C	29704	C	29656	C	29524	G
842	IGS (trnC-GCA, petN)	LSC	29673	A	29414	A	29805	A	29673	A	29715	A	29705	A	29657	A	29525	G
843	IGS (trnC-GCA, petN)	LSC	29711	A	29452	A	29843	A	29711	A	29753	A	29743	A	29695	A	29563	G
844	IGS (trnC-GCA, petN)	LSC	29720	G	29461	G	29852	G	29720	G	29762	G	29752	G	29704	G	29572	A
845	IGS (trnC-GCA, petN)	LSC	29746	A	29487	A	29878	A	29746	A	29788	A	29778	A	29730	C	29598	G
846	IGS (trnC-GCA, petN)	LSC	29780	G	29521	G	29912	G	29780	G	29822	G	29812	G	29764	G	29632	A
847	IGS (trnC-GCA, petN)	LSC	29819	G	29560	C	29951	G	29819	G	29861	G	29851	G	29802	G	29671	G
848	IGS (trnC-GCA, petN)	LSC	29888	G	29629	G	30020	G	29888	G	29930	G	29920	G	29871	C	29740	G
849	IGS (trnC-GCA, petN)	LSC	29897	T	29638	C	30029	C	29897	C	29939	C	29929	C	29880	C	29749	C
850	IGS (trnC-GCA, petN)	LSC	29901	A	29642	A	30033	A	29901	A	29943	A	29933	A	29884	A	29753	G
851	IGS (trnC-GCA, petN)	LSC	29935	A	29676	G	30067	G	29935	G	29977	G	29967	G	29918	G	29787	G
852	IGS (trnC-GCA, petN)	LSC	29955	T	29696	T	30087	T	29955	T	29997	T	29987	T	29938	T	29807	C
853	IGS (trnC-GCA, petN)	LSC	29969	T	29710	T	30101	T	29969	T	30011	T	30001	T	29952	T	29820	C
854	IGS (trnC-GCA, petN)	LSC	29975	T	29716	T	30107	T	29975	T	30017	T	30007	T	29958	T	29826	C
855	IGS (trnC-GCA, petN)	LSC	29995	T	29736	T	30127	T	29995	T	30037	T	30027	C	29978	T	29846	T
856	IGS (trnC-GCA, petN)	LSC	30002	A	29743	A	30134	A	30002	A	30044	A	30034	G	29985	A	29853	A
857	IGS (trnC-GCA, petN)	LSC	30025	T	29766	G	30157	G	30025	G	30067	G	30057	G	30008	G	29876	G
858	IGS (petN, psbM)	LSC	30200	G	29941	G	30332	A	30200	G	30242	G	30232	G	30183	G	30051	G
859	IGS (petN, psbM)	LSC	30212	T	29953	G	30344	G	30212	G	30254	G	30244	G	30195	G	30063	A
860	IGS (petN, psbM)	LSC	30238	C	29979	A	30370	A	30238	C	30280	A	30270	A	30221	A	30089	A
861	IGS (petN, psbM)	LSC	30245	A	29986	T	30377	T	30245	T	30287	T	30277	T	30228	T	30096	T
862	IGS (petN, psbM)	LSC	30252	G	29993	T	30384	T	30252	G	30294	T	30284	T	30235	T	30103	T
863	IGS (petN, psbM)	LSC	30274	G	30015	G	30406	G	30274	G	30316	T	30306	G	30257	G	30125	G
864	IGS (petN, psbM)	LSC	30282	G	30023	A	30414	A	30282	G	30324	A	30314	A	30265	G	30133	G
865	IGS (petN, psbM)	LSC	30311	T	30052	C	30443	C	30311	T	30353	C	30343	C	30294	C	30162	C
866	IGS (petN, psbM)	LSC	30325	A	30066	A	30457	G	30325	A	30367	A	30357	A	30308	A	30176	A
867	IGS (petN, psbM)	LSC	30333	C	30074	C	30465	C	30333	C	30375	C	30365	C	30316	C	30184	T
868	IGS (petN, psbM)	LSC	30339	C	30080	C	30471	C	30339	C	30381	C	30371	T	30322	C	30190	C
869	IGS (petN, psbM)	LSC	30387	A	30128	A	30519	A	30387	C	30429	A	30419	A	30371	A	30238	A
870	IGS (petN, psbM)	LSC	30391	C	30132	C	30523	C	30391	T	30433	C	30423	C	30375	C	30242	G
871	IGS (petN, psbM)	LSC	30396	C	30137	C	30528	C	30396	C	30438	C	30428	C	30380	C	30247	T
872	IGS (petN, psbM)	LSC	30397	A	30138	A	30529	A	30397	A	30439	A	30429	A	30381	A	30248	C
873	IGS (petN, psbM)	LSC	30399	A	30140	T	30531	T	30399	T	30441	T	30431	T	30383	T	30250	T
874	IGS (petN, psbM)	LSC	30423	A	30164	A	30555	A	30423	A	30465	A	30455	A	30407	A	30273	C
875	IGS (petN, psbM)	LSC	30444	T	30185	T	30576	C	30444	T	30486	T	30476	T	30428	T	30294	T
876	IGS (petN, psbM)	LSC	30459	G	30200	G	30591	G	30459	G	30501	G	30491	G	30443	G	30309	A
877	IGS (petN, psbM)	LSC	30461	G	30202	C	30593	G	30461	G	30503	G	30493	G	30445	G	30311	G
878	IGS (petN, psbM)	LSC	30468	C	30209	C	30600	T	30468	C	30510	C	30500	C	30452	C	30318	C
879	IGS (petN, psbM)	LSC	30473	T	30214	C	30605	C	30473	T	30515	C	30505	C	30457	C	30323	C
880	IGS (petN, psbM)	LSC	30475	C	30216	C	30607	C	30475	C	30517	C	30507	T	30459	C	30325	C
881	IGS (petN, psbM)	LSC	30527	T	30268	G	30659	G	30527	G	30569	G	30559	G	30511	G	30377	G
882	IGS (petN, psbM)	LSC	30554	T	30295	G	30686	G	30554	T	30596	G	30586	G	30544	T	30397	T
883	IGS (petN, psbM)	LSC	30568	T	30309	G	30700	T	30568	T	30610	T	30600	T	30558	T	30411	T
884	IGS (petN, psbM)	LSC	30608	G	30349	G	30740	G	30608	A	30650	G	30640	G	30598	G	30451	G
885	IGS (petN, psbM)	LSC	30663	A	30404	A	30795	A	30663	A	30705	A	30695	A	30653	G	30506	A
886	IGS (petN, psbM)	LSC	30687	G	30428	G	30819	G	30687	T	30729	G	30719	G	30677	G	30530	G
887	IGS (petN, psbM)	LSC	30721	G	30462	G	30853	G	30721	G	30763	G	30753	G	30711	A	30564	A
888	IGS (petN, psbM)	LSC	30737	C	30478	T	30869	T	30737	T	30779	T	30769	T	30727	T	30580	T
889	IGS (petN, psbM)	LSC	30738	A	30479	A	30870	A	30738	A	30780	A	30770	A	30728	A	30581	G
890	IGS (petN, psbM)	LSC	30780	C	30521	C	30912	C	30780	C	30822	C	30812	C	30770	G	30623	C
891	IGS (petN, psbM)	LSC	30781	G	30522	G	30913	G	30781	G	30823	G	30813	G	30771	G	30624	A
892	IGS (petN, psbM)	LSC	30786	A	30527	A	30918	A	30786	A	30828	A	30818	A	30776	A	30629	G
893	IGS (petN, psbM)	LSC	30797	C	30538	G	30929	G	30797	C	30839	G	30829	G	30787	C	30640	C
894	IGS (petN, psbM)	LSC	30807	C	30548	C	30939	T	30807	C	30849	C	30839	T	30797	C	30650	C
895	IGS (petN, psbM)	LSC	30823	T	30564	T	30955	C	30823	T	30865	T	30855	T	30813	T	30666	T
896	IGS (petN, psbM)	LSC	30854	C	30594	T	30986	C	30854	C	30900	T	30886	C	30845	C	30696	C
897	IGS (petN, psbM)	LSC	30862	A	30602	T	30994	T	30862	T	30908	T	30894	T	30853	T	30704	T
898	IGS (petN, psbM)	LSC	30864	A	30604	T	30996	T	30864	T	30910	T	30896	T	30855	T	30706	T
899	IGS (petN, psbM)	LSC	31184	G	30923	G	31315	A	31184	G	31230	G	31216	G	30886	G	31018	G
900	IGS (petN, psbM)	LSC	31225	T	30964	T	31356	T	31225	G	31271	T	31257	T	30927	T	31059	T
901	IGS (petN, psbM)	LSC	31227	A	30966	G	31358	G	31227	G	31273	G	31259	G	30929	G	31061	G
902	IGS (petN, psbM)	LSC	31230	T	30969	C	31361	C	31230	C	31276	C	31262	C	30932	C	31064	C
903	IGS (petN, psbM)	LSC	31254	T	30993	T	31385	G	31254	T	31300	T	31286	T	30956	T	31088	T
904	IGS (petN, psbM)	LSC	31289	C	31028	C	31420	C	31289	C	31335	C	31321	C	30991	C	31123	T
905	IGS (petN, psbM)	LSC	31290	T	31029	T	31421	T	31290	T	31336	C	31322	T	30992	T	31124	T
906	IGS (petN, psbM)	LSC	31295	A	31034	A	31426	A	31295	A	31341	A	31327	A	30997	T	31129	T
907	IGS (petN, psbM)	LSC	31345	T	31084	G	31476	T	31345	T	31391	T	31377	T	31047	T	31176	T
908	psbM	LSC	31369	G	31108	A	31500	G	31369	G	31415	G	31401	G	31071	G	31200	G
909	psbM	LSC	31387	T	31126	T	31518	T	31387	G	31433	T	31419	T	31089	G	31218	T
910	IGS (psbM, trnD-GUC)	LSC	31480	C	31220	C	31610	C	31480	G	31528	C	31512	C	31185	C	31315	C
911	IGS (psbM, trnD-GUC)	LSC	31518	C	31258	C	31648	C	31518	T	31566	C	31550	C	31223	C	31353	C
912	IGS (psbM, trnD-GUC)	LSC	31524	T	31264	T	31654	T	31524	T	31572	T	31556	T	31229	T	31359	G
913	IGS (psbM, trnD-GUC)	LSC	31629	G	31369	T	31759	T	31629	G	31677	T	31661	T	31334	T	31464	T
914	IGS (psbM, trnD-GUC)	LSC	31665	C	31405	C	31795	C	31665	C	31713	C	31697	C	31370	C	31500	T
915	IGS (psbM, trnD-GUC)	LSC	31673	A	31413	G	31803	G	31673	A	31721	G	31705	G	31378	A	31508	T
916	IGS (psbM, trnD-GUC)	LSC	31679	T	31419	T	31809	T	31679	T	31727	A	31711	T	31384	G	31514	A
917	IGS (psbM, trnD-GUC)	LSC	31680	A	31420	A	31810	C	31680	A	31728	A	31712	C	31385	A	31515	A
918	IGS (psbM, trnD-GUC)	LSC	31685	C	31425	C	31815	C	31685	C	31733	C	31717	C	31390	C	31520	A
919	IGS (psbM, trnD-GUC)	LSC	31723	C	31463	C	31853	C	31723	C	31771	C	31755	C	31428	C	31558	A
920	IGS (psbM, trnD-GUC)	LSC	31725	A	31465	A	31855	G	31725	A	31773	A	31757	G	31430	A	31560	A
921	IGS (psbM, trnD-GUC)	LSC	31729	G	31469	G	31859	G	31729	G	31777	G	31761	G	31434	G	31564	T
922	IGS (psbM, trnD-GUC)	LSC	31752	G	31492	G	31882	G	31752	G	31800	G	31784	G	31457	G	31586	T
923	IGS (psbM, trnD-GUC)	LSC	31764	T	31504	T	31894	T	31764	T	31812	T	31796	T	31469	T	31598	G
924	IGS (psbM, trnD-GUC)	LSC	31772	T	31512	T	31902	T	31772	T	31820	C	31804	T	31477	T	31606	T
925	IGS (psbM, trnD-GUC)	LSC	31781	A	31521	A	31911	G	31781	A	31829	A	31813	A	31486	A	31615	A
926	IGS (psbM, trnD-GUC)	LSC	31805	T	31545	T	31935	C	31805	T	31853	T	31837	C	31510	T	31639	T
927	IGS (psbM, trnD-GUC)	LSC	31816	A	31556	A	31946	A	31816	A	31864	A	31848	A	31521	G	31650	A
928	IGS (psbM, trnD-GUC)	LSC	31859	G	31599	G	31989	G	31859	T	31907	G	31891	G	31564	G	31693	G
929	IGS (psbM, trnD-GUC)	LSC	31866	T	31606	T	31996	G	31866	T	31914	T	31898	T	31571	T	31700	T
930	IGS (psbM, trnD-GUC)	LSC	31954	C	31694	C	32084	C	31954	C	32002	C	31986	C	31665	A	31788	C
931	IGS (psbM, trnD-GUC)	LSC	31983	T	31723	C	32113	C	31983	T	32031	C	32015	C	31694	C	31817	C
932	IGS (psbM, trnD-GUC)	LSC	31984	G	31724	G	32114	G	31984	G	32032	G	32016	G	31695	G	31818	T
933	IGS (psbM, trnD-GUC)	LSC	31996	C	31736	T	32126	T	31996	C	32044	T	32028	T	31707	C	31830	C
934	IGS (psbM, trnD-GUC)	LSC	32003	C	31743	C	32133	A	32003	C	32051	C	32035	C	31714	C	31837	A
935	IGS (psbM, trnD-GUC)	LSC	32016	A	31756	A	32146	A	32016	A	32064	A	32048	A	31732	C	31850	A
936	IGS (psbM, trnD-GUC)	LSC	32020	A	31760	A	32150	A	32020	A	32068	A	32052	A	31736	T	31854	A
937	IGS (psbM, trnD-GUC)	LSC	32023	C	31763	C	32153	C	32023	C	32071	C	32055	C	31739	A	31857	C
938	IGS (psbM, trnD-GUC)	LSC	32118	C	31858	C	32248	C	32118	C	32166	C	32150	A	31814	C	31952	C
939	IGS (psbM, trnD-GUC)	LSC	32122	G	31862	A	32252	A	32122	A	32170	A	32154	A	31818	A	31956	A
940	IGS (psbM, trnD-GUC)	LSC	32143	G	31883	G	32273	G	32143	A	32191	G	32175	G	31839	G	31977	G
941	IGS (psbM, trnD-GUC)	LSC	32192	A	31932	G	32322	G	32192	G	32240	G	32224	G	31888	G	32027	G
942	IGS (psbM, trnD-GUC)	LSC	32208	T	31948	G	32338	T	32208	T	32256	T	32240	T	31904	T	32043	T
943	IGS (psbM, trnD-GUC)	LSC	32265	G	32005	G	32395	G	32265	G	32313	G	32297	G	31961	G	32094	T
944	IGS (psbM, trnD-GUC)	LSC	32270	G	32010	G	32400	G	32270	A	32318	G	32302	G	31966	G	32099	G
945	IGS (psbM, trnD-GUC)	LSC	32280	A	32020	A	32410	A	32280	A	32328	T	32312	A	31976	A	32109	A
946	IGS (psbM, trnD-GUC)	LSC	32299	T	32039	G	32429	T	32299	T	32347	G	32331	T	31995	T	32128	T
947	IGS (psbM, trnD-GUC)	LSC	32303	T	32043	T	32433	T	32303	T	32351	T	32335	T	31999	T	32132	G
948	IGS (psbM, trnD-GUC)	LSC	32307	C	32047	T	32437	C	32307	C	32355	C	32339	C	32003	C	32136	C
949	IGS (psbM, trnD-GUC)	LSC	32338	A	32078	A	32468	A	32338	A	32386	A	32370	A	32034	C	32167	A
950	IGS (psbM, trnD-GUC)	LSC	32369	A	32109	T	32499	A	32369	A	32417	T	32401	A	32065	A	32198	A
951	IGS (psbM, trnD-GUC)	LSC	32383	T	32123	T	32513	T	32383	T	32431	T	32415	T	32079	G	32212	T
952	IGS (psbM, trnD-GUC)	LSC	32391	A	32131	A	32521	T	32391	A	32439	A	32423	A	32087	A	32220	A
953	IGS (psbM, trnD-GUC)	LSC	32402	T	32142	G	32532	G	32402	G	32450	G	32434	G	32098	G	32231	G
954	IGS (psbM, trnD-GUC)	LSC	32450	G	32190	A	32580	G	32450	G	32498	G	32482	G	32146	G	32279	G
955	IGS (psbM, trnD-GUC)	LSC	32465	A	32205	A	32595	A	32465	A	32513	A	32497	G	32161	A	32294	A
956	IGS (psbM, trnD-GUC)	LSC	32475	C	32215	T	32605	C	32475	C	32523	C	32507	C	32171	C	32304	C
957	IGS (psbM, trnD-GUC)	LSC	32491	A	32231	A	32621	A	32491	A	32539	A	32523	C	32187	A	32320	A
958	IGS (psbM, trnD-GUC)	LSC	32504	G	32241	A	32632	A	32504	G	32553	A	32526	A	32202	A	32331	A
959	IGS (psbM, trnD-GUC)	LSC	32506	A	32243	A	32634	G	32506	A	32555	A	32528	A	32204	A	32333	G
960	IGS (psbM, trnD-GUC)	LSC	32507	A	32244	A	32635	A	32507	A	32556	A	32529	G	32205	A	32334	A
961	IGS (psbM, trnD-GUC)	LSC	32534	T	32271	T	32662	T	32534	T	32583	T	32556	T	32232	C	32361	T
962	IGS (psbM, trnD-GUC)	LSC	32547	T	32284	T	32675	T	32547	T	32596	T	32569	T	32245	T	32374	G
963	IGS (psbM, trnD-GUC)	LSC	32549	T	32286	T	32677	G	32549	T	32598	T	32571	T	32247	T	32376	T
964	IGS (psbM, trnD-GUC)	LSC	32576	T	32313	T	32704	T	32576	T	32625	C	32598	T	32274	C	32403	C
965	IGS (psbM, trnD-GUC)	LSC	32607	A	32338	G	32735	G	32607	A	32656	G	32629	G	32305	A	32434	A
966	IGS (psbM, trnD-GUC)	LSC	32616	G	32347	G	32744	G	32616	G	32665	G	32638	A	32314	G	32443	G
967	IGS (trnD-GUC, trnY-GUA)	LSC	32708	T	32439	T	32836	T	32708	T	32757	T	32730	T	32406	T	32535	C
968	IGS (trnD-GUC, trnY-GUA)	LSC	32759	C	32490	C	32887	C	32759	C	32808	T	32781	C	32457	C	32587	C
969	IGS (trnD-GUC, trnY-GUA)	LSC	32990	A	32681	A	33010	A	32990	A	32999	A	32963	A	32682	C	32819	A
970	IGS (trnD-GUC, trnY-GUA)	LSC	33059	G	32750	G	33079	G	33059	G	33068	G	33032	G	32728	G	32888	T
971	IGS (trnY-GUA, trnE-UUC)	LSC	33186	T	32877	T	33206	T	33186	T	33195	T	33159	T	32855	C	33015	C
972	IGS (trnE-UUC, trnT-GGU)	LSC	33341	C	33032	C	33361	C	33341	C	33350	C	33314	C	33010	A	33170	C
973	IGS (trnE-UUC, trnT-GGU)	LSC	33385	G	33076	A	33405	A	33385	G	33394	A	33358	A	33054	A	33214	G
974	IGS (trnE-UUC, trnT-GGU)	LSC	33389	T	33080	T	33409	T	33389	T	33398	G	33362	T	33058	T	33218	T
975	IGS (trnE-UUC, trnT-GGU)	LSC	33390	A	33081	A	33410	A	33390	A	33399	A	33363	A	33059	A	33219	G
976	IGS (trnE-UUC, trnT-GGU)	LSC	33392	C	33083	C	33412	C	33392	C	33401	C	33365	C	33061	C	33221	A
977	IGS (trnE-UUC, trnT-GGU)	LSC	33398	C	33089	C	33418	A	33398	C	33407	C	33371	C	33067	C	33227	C
978	IGS (trnE-UUC, trnT-GGU)	LSC	33404	G	33095	G	33424	G	33404	G	33413	G	33377	G	33073	G	33233	C
979	IGS (trnE-UUC, trnT-GGU)	LSC	33422	A	33113	G	33442	G	33422	A	33431	G	33397	G	33091	G	33251	G
980	IGS (trnE-UUC, trnT-GGU)	LSC	33452	C	33143	T	33472	C	33452	C	33461	C	33427	C	33121	C	33281	C
981	IGS (trnE-UUC, trnT-GGU)	LSC	33509	A	33201	A	33529	A	33509	A	33518	A	33484	A	33183	A	33346	C
982	IGS (trnE-UUC, trnT-GGU)	LSC	33529	T	33221	T	33549	T	33529	T	33538	T	33504	T	33203	T	33366	G
983	IGS (trnE-UUC, trnT-GGU)	LSC	33562	T	33237	A	33582	T	33562	T	33571	T	33537	T	33236	T	33399	T
984	IGS (trnE-UUC, trnT-GGU)	LSC	33574	A	33249	A	33594	C	33574	A	33583	A	33549	A	33248	A	33411	A
985	IGS (trnE-UUC, trnT-GGU)	LSC	33586	T	33261	T	33606	T	33586	T	33595	T	33561	T	33260	G	33423	T
986	IGS (trnE-UUC, trnT-GGU)	LSC	33665	G	33333	G	33678	G	33665	G	33669	G	33633	T	33331	G	33495	G
987	IGS (trnE-UUC, trnT-GGU)	LSC	33691	G	33359	G	33704	G	33691	G	33695	G	33659	G	33357	A	33520	G
988	IGS (trnE-UUC, trnT-GGU)	LSC	33707	T	33375	A	33720	T	33707	T	33711	T	33675	T	33373	T	33536	T
989	IGS (trnE-UUC, trnT-GGU)	LSC	33714	G	33382	T	33727	G	33714	G	33718	G	33682	G	33380	G	33543	G
990	IGS (trnE-UUC, trnT-GGU)	LSC	33723	G	33391	G	33736	G	33723	G	33727	G	33691	A	33389	G	33552	G
991	IGS (trnE-UUC, trnT-GGU)	LSC	33731	G	33399	G	33744	G	33731	G	33735	G	33699	C	33397	G	33560	G
992	IGS (trnE-UUC, trnT-GGU)	LSC	33777	T	33445	T	33790	T	33777	C	33781	T	33745	T	33443	T	33606	T
993	IGS (trnE-UUC, trnT-GGU)	LSC	33801	G	33469	G	33814	G	33801	G	33805	G	33769	G	33467	G	33630	A
994	IGS (trnT-GGU, psbD)	LSC	33888	G	33556	G	33901	G	33888	G	33892	G	33856	G	33554	G	33717	T
995	IGS (trnT-GGU, psbD)	LSC	33904	C	33572	C	33917	C	33904	C	33908	C	33872	C	33570	C	33733	A
996	IGS (trnT-GGU, psbD)	LSC	33926	G	33594	A	33939	A	33926	G	33930	A	33894	A	33592	A	33755	A
997	IGS (trnT-GGU, psbD)	LSC	33937	G	33605	G	33950	G	33937	G	33941	G	33905	G	33603	T	33766	G
998	IGS (trnT-GGU, psbD)	LSC	33939	G	33607	G	33952	G	33939	G	33943	G	33907	G	33605	A	33768	G
999	IGS (trnT-GGU, psbD)	LSC	33976	G	33644	G	33989	G	33976	G	33980	G	33944	G	33641	G	33804	C
1000	IGS (trnT-GGU, psbD)	LSC	33978	A	33646	A	33991	C	33978	A	33982	A	33946	A	33643	A	33806	A
1001	IGS (trnT-GGU, psbD)	LSC	34011	A	33679	A	34024	A	34011	G	34015	A	33979	A	33676	A	33839	A
1002	IGS (trnT-GGU, psbD)	LSC	34051	T	33719	T	34064	C	34051	T	34055	T	34019	T	33711	T	33879	T
1003	IGS (trnT-GGU, psbD)	LSC	34053	G	33721	G	34066	G	34053	G	34057	G	34021	G	33713	G	33881	A
1004	IGS (trnT-GGU, psbD)	LSC	34056	C	33724	C	34069	C	34056	T	34060	C	34024	C	33716	C	33884	C
1005	IGS (trnT-GGU, psbD)	LSC	34072	G	33753	G	34098	T	34072	G	34089	G	34053	G	33745	G	33922	G
1006	IGS (trnT-GGU, psbD)	LSC	34087	G	33768	G	34113	G	34087	G	34104	A	34068	G	33760	G	33937	G
1007	IGS (trnT-GGU, psbD)	LSC	34118	C	33799	C	34144	C	34118	C	34135	C	34099	T	33791	C	33968	C
1008	IGS (trnT-GGU, psbD)	LSC	34134	C	33815	C	34160	T	34134	C	34151	C	34115	C	33807	C	33984	C
1009	IGS (trnT-GGU, psbD)	LSC	34137	A	33818	A	34163	T	34137	A	34154	A	34118	A	33810	A	33987	A
1010	IGS (trnT-GGU, psbD)	LSC	34155	C	33836	C	34181	C	34155	C	34172	C	34136	C	33828	T	34005	C
1011	IGS (trnT-GGU, psbD)	LSC	34236	T	33917	G	34262	G	34236	G	34253	G	34217	G	33909	G	34086	G
1012	IGS (trnT-GGU, psbD)	LSC	34237	A	33918	A	34263	A	34237	A	34254	A	34218	A	33910	A	34087	G
1013	IGS (trnT-GGU, psbD)	LSC	34266	T	33947	C	34293	C	34266	C	34283	C	34247	C	33939	C	34116	C
1014	IGS (trnT-GGU, psbD)	LSC	34277	A	33958	A	34304	A	34277	A	34294	A	34258	G	33950	A	34127	A
1015	IGS (trnT-GGU, psbD)	LSC	34359	T	34040	T	34386	T	34359	T	34376	T	34340	T	34032	T	34209	C
1016	IGS (trnT-GGU, psbD)	LSC	34371	G	34052	G	34398	G	34371	G	34388	G	34352	G	34044	T	34221	G
1017	IGS (trnT-GGU, psbD)	LSC	34386	A	34067	A	34413	A	34386	A	34403	A	34367	A	34059	G	34236	A
1018	IGS (trnT-GGU, psbD)	LSC	34411	C	34092	C	34438	C	34411	C	34428	C	34392	C	34084	A	34261	C
1019	IGS (trnT-GGU, psbD)	LSC	34428	A	34109	A	34455	A	34428	A	34445	A	34409	A	34101	A	34278	C
1020	IGS (trnT-GGU, psbD)	LSC	34446	G	34127	T	34473	T	34446	G	34463	T	34427	T	34119	T	34296	T
1021	IGS (trnT-GGU, psbD)	LSC	34451	A	34132	A	34478	A	34451	A	34468	A	34432	A	34124	C	34301	A
1022	IGS (trnT-GGU, psbD)	LSC	34453	G	34134	G	34480	G	34453	G	34470	G	34434	G	34126	A	34303	G
1023	IGS (trnT-GGU, psbD)	LSC	34464	A	34143	A	34489	A	34464	A	34479	A	34443	A	34133	G	34312	A
1024	IGS (trnT-GGU, psbD)	LSC	34466	A	34145	C	34491	A	34466	A	34481	A	34445	A	34135	A	34314	A
1025	IGS (trnT-GGU, psbD)	LSC	34467	T	34146	T	34492	T	34467	T	34482	T	34446	G	34136	T	34315	T
1026	IGS (trnT-GGU, psbD)	LSC	34469	T	34148	T	34494	T	34469	T	34484	T	34448	T	34138	T	34317	G
1027	IGS (trnT-GGU, psbD)	LSC	34471	T	34150	G	34496	G	34471	T	34486	G	34450	G	34140	T	34319	T
1028	IGS (trnT-GGU, psbD)	LSC	34479	C	34158	C	34504	C	34479	C	34494	C	34458	C	34148	C	34327	A
1029	IGS (trnT-GGU, psbD)	LSC	34486	T	34165	T	34511	T	34486	T	34501	T	34465	T	34155	G	34334	T
1030	IGS (trnT-GGU, psbD)	LSC	34497	A	34176	A	34522	A	34497	A	34512	A	34476	C	34166	A	34345	A
1031	IGS (trnT-GGU, psbD)	LSC	34510	G	34189	G	34535	G	34510	G	34525	G	34489	G	34179	G	34358	A
1032	IGS (trnT-GGU, psbD)	LSC	34543	T	34222	T	34580	C	34543	T	34558	T	34522	T	34212	T	34391	T
1033	IGS (trnT-GGU, psbD)	LSC	34552	G	34231	G	34589	G	34552	G	34567	G	34531	G	34221	A	34400	G
1034	IGS (trnT-GGU, psbD)	LSC	34553	A	34232	A	34590	A	34553	A	34568	A	34532	A	34222	G	34401	A
1035	IGS (trnT-GGU, psbD)	LSC	34562	A	34241	G	34599	G	34562	G	34577	G	34541	G	34231	G	34410	G
1036	IGS (trnT-GGU, psbD)	LSC	34563	G	34242	G	34600	G	34563	G	34578	G	34542	G	34232	C	34411	G
1037	IGS (trnT-GGU, psbD)	LSC	34577	G	34256	T	34614	T	34577	T	34592	T	34556	T	34246	T	34425	T
1038	IGS (trnT-GGU, psbD)	LSC	34578	G	34257	T	34615	G	34578	G	34593	T	34557	T	34247	T	34426	A
1039	IGS (trnT-GGU, psbD)	LSC	34612	A	34284	A	34642	A	34612	A	34620	A	34584	A	34274	A	34453	G
1040	IGS (trnT-GGU, psbD)	LSC	34616	A	34288	C	34646	A	34616	A	34624	A	34602	A	34278	A	34457	A
1041	IGS (trnT-GGU, psbD)	LSC	34620	G	34292	G	34650	G	34620	G	34628	G	34606	T	34282	G	34461	G
1042	IGS (trnT-GGU, psbD)	LSC	34622	A	34294	A	34652	A	34622	C	34630	A	34608	A	34284	A	34463	A
1043	IGS (trnT-GGU, psbD)	LSC	34636	C	34308	C	34666	C	34636	C	34644	C	34622	C	34298	C	34477	A
1044	IGS (trnT-GGU, psbD)	LSC	34660	C	34332	C	34690	C	34660	C	34668	C	34646	C	34322	C	34501	A
1045	IGS (trnT-GGU, psbD)	LSC	34697	C	34369	C	34727	C	34697	C	34705	C	34683	C	34359	T	34538	C
1046	IGS (trnT-GGU, psbD)	LSC	34700	A	34372	G	34730	G	34700	G	34708	G	34686	G	34362	G	34541	G
1047	IGS (trnT-GGU, psbD)	LSC	34701	C	34373	C	34731	C	34701	C	34709	C	34687	C	34363	T	34542	C
1048	IGS (trnT-GGU, psbD)	LSC	34743	A	34393	A	34773	A	34743	C	34751	A	34729	A	34405	A	34584	A
1049	IGS (trnT-GGU, psbD)	LSC	34746	A	34396	A	34776	A	34746	A	34754	A	34732	A	34408	C	34587	A
1050	IGS (trnT-GGU, psbD)	LSC	34757	A	34407	T	34787	T	34757	T	34765	T	34743	T	34419	T	34598	T
1051	IGS (trnT-GGU, psbD)	LSC	34795	A	34447	C	34823	A	34795	A	34806	A	34775	A	34451	A	34617	A
1052	IGS (trnT-GGU, psbD)	LSC	34821	T	34473	T	34849	G	34821	G	34832	G	34801	G	34477	G	34643	G
1053	IGS (trnT-GGU, psbD)	LSC	34844	C	34496	C	34872	C	34844	C	34855	C	34824	C	34500	A	34666	C
1054	IGS (trnT-GGU, psbD)	LSC	34856	T	34508	T	34884	T	34856	T	34867	T	34836	T	34512	G	34678	T
1055	IGS (trnT-GGU, psbD)	LSC	34869	T	34521	T	34897	T	34869	T	34880	T	34849	T	34525	G	34691	T
1056	IGS (trnT-GGU, psbD)	LSC	34881	A	34533	G	34909	A	34881	A	34892	G	34861	A	34537	A	34703	A
1057	IGS (trnT-GGU, psbD)	LSC	34889	A	34541	A	34917	A	34889	A	34900	A	34869	G	34545	A	34711	A
1058	IGS (trnT-GGU, psbD)	LSC	34895	A	34547	C	34923	C	34895	C	34906	C	34875	C	34551	C	34717	C
1059	IGS (trnT-GGU, psbD)	LSC	34932	G	34584	T	34960	T	34932	G	34943	T	34912	T	34588	T	34754	T
1060	IGS (trnT-GGU, psbD)	LSC	34968	G	34620	G	34996	G	34968	G	34979	G	34948	G	34624	A	34790	G
1061	IGS (trnT-GGU, psbD)	LSC	34976	A	34628	A	35004	A	34976	A	34987	C	34956	A	34632	A	34798	A
1062	IGS (trnT-GGU, psbD)	LSC	34980	C	34632	T	35008	T	34980	C	34991	T	34960	T	34636	T	34802	T
1063	IGS (trnT-GGU, psbD)	LSC	34990	G	34642	G	35018	G	34990	A	35001	G	34970	G	34646	G	34812	G
1064	IGS (trnT-GGU, psbD)	LSC	35016	C	34668	A	35044	C	35016	C	35027	C	34990	C	34672	C	34838	C
1065	IGS (trnT-GGU, psbD)	LSC	35048	G	34700	G	35076	G	35048	G	35059	G	35022	G	34704	A	34870	G
1066	IGS (trnT-GGU, psbD)	LSC	35080	C	34732	C	35108	C	35080	C	35091	C	35054	C	34736	C	34901	T
1067	IGS (trnT-GGU, psbD)	LSC	35099	G	34751	A	35127	G	35099	G	35110	G	35073	G	34755	G	34920	G
1068	psbD	LSC	35264	C	34916	C	35292	C	35264	C	35275	C	35238	C	34920	T	35085	C
1069	psbD	LSC	35333	T	34985	T	35361	T	35333	T	35344	T	35307	T	34989	T	35154	G
1070	psbD	LSC	35354	G	35006	A	35382	G	35354	G	35365	A	35328	G	35010	G	35175	G
1071	psbD	LSC	35369	G	35021	G	35397	G	35369	G	35380	G	35343	G	35025	G	35190	A
1072	psbD	LSC	35402	G	35054	A	35430	A	35402	G	35413	A	35376	A	35058	G	35223	G
1073	psbD	LSC	35501	T	35153	T	35529	T	35501	T	35512	T	35475	G	35157	T	35322	T
1074	psbD	LSC	35544	T	35196	T	35572	T	35544	T	35555	T	35518	T	35200	C	35365	T
1075	psbD	LSC	35555	T	35207	C	35583	C	35555	C	35566	C	35529	C	35211	C	35376	C
1076	psbD	LSC	35714	C	35366	C	35742	C	35714	C	35725	C	35688	C	35370	C	35535	T
1077	psbD	LSC	35819	A	35471	A	35847	C	35819	A	35830	A	35793	C	35475	A	35640	A
1078	psbD	LSC	35858	A	35510	G	35886	G	35858	A	35869	G	35832	G	35514	A	35679	A
1079	psbC	LSC	36363	C	36015	C	36391	C	36363	C	36374	C	36337	T	36019	C	36184	C
1080	psbC	LSC	36387	G	36039	G	36415	G	36387	T	36398	G	36361	G	36043	G	36208	G
1081	psbC	LSC	36645	T	36297	C	36673	C	36645	C	36656	C	36619	C	36301	C	36466	C
1082	psbC	LSC	36744	C	36396	C	36772	C	36744	C	36755	C	36718	C	36400	C	36565	G
1083	psbC	LSC	36912	T	36564	T	36940	T	36912	T	36923	T	36886	T	36568	C	36733	T
1084	psbC	LSC	37176	C	36828	C	37204	C	37176	C	37187	C	37150	C	36832	G	36997	C
1085	psbC	LSC	37179	G	36831	G	37207	G	37179	G	37190	A	37153	G	36835	G	37000	G
1086	psbC	LSC	37206	A	36858	G	37234	G	37206	G	37217	G	37180	G	36862	G	37027	G
1087	psbC	LSC	37296	G	36948	G	37324	G	37296	G	37307	G	37270	A	36952	G	37117	G
1088	psbC	LSC	37299	C	36951	C	37327	C	37299	C	37310	C	37273	C	36955	C	37120	T
1089	psbC	LSC	37422	C	37074	C	37450	T	37422	C	37433	C	37396	C	37078	C	37243	C
1090	psbC	LSC	37434	T	37086	T	37462	T	37434	T	37445	T	37408	T	37090	T	37255	G
1091	psbC	LSC	37491	T	37143	T	37519	C	37491	T	37502	T	37465	T	37147	T	37312	T
1092	psbC	LSC	37503	C	37155	C	37531	C	37503	C	37514	C	37477	T	37159	C	37324	C
1093	psbC	LSC	37527	A	37179	A	37555	A	37527	A	37538	A	37501	A	37183	C	37348	A
1094	psbC	LSC	37581	C	37233	C	37609	C	37581	C	37592	C	37555	C	37237	C	37402	T
1095	IGS (psbC, trnS-UGA)	LSC	37641	A	37293	A	37669	C	37641	A	37652	A	37615	A	37297	A	37462	A
1096	IGS (psbC, trnS-UGA)	LSC	37643	A	37295	A	37671	A	37643	A	37654	A	37617	A	37299	G	37464	A
1097	IGS (psbC, trnS-UGA)	LSC	37658	C	37310	C	37686	C	37658	C	37669	C	37632	C	37314	T	37479	C
1098	IGS (psbC, trnS-UGA)	LSC	37753	G	37408	T	37782	T	37753	G	37766	T	37728	T	37410	T	37576	T
1099	IGS (psbC, trnS-UGA)	LSC	37769	G	37424	G	37798	G	37769	A	37782	G	37744	G	37426	G	37592	G
1100	IGS (trnS-UGA, psbZ)	LSC	37921	A	37572	A	37946	A	37921	C	37930	A	37892	A	37574	A	37740	A
1101	IGS (trnS-UGA, psbZ)	LSC	37937	T	37588	C	37962	C	37937	C	37946	C	37908	C	37590	C	37756	C
1102	IGS (trnS-UGA, psbZ)	LSC	37944	A	37595	A	37969	A	37944	C	37953	A	37915	A	37597	A	37763	A
1103	IGS (trnS-UGA, psbZ)	LSC	37959	G	37610	G	37984	G	37959	G	37968	G	37930	G	37612	A	37778	G
1104	IGS (trnS-UGA, psbZ)	LSC	38010	T	37661	T	38035	T	38010	T	38019	T	37981	T	37663	T	37829	C
1105	IGS (trnS-UGA, psbZ)	LSC	38020	T	37671	T	38045	G	38020	C	38029	T	37991	T	37673	T	37839	T
1106	IGS (trnS-UGA, psbZ)	LSC	38093	C	37745	C	38121	C	38093	C	38103	C	38065	C	37747	A	37917	C
1107	IGS (trnS-UGA, psbZ)	LSC	38097	A	37749	A	38125	A	38097	A	38107	A	38069	A	37751	A	37921	G
1108	IGS (trnS-UGA, psbZ)	LSC	38138	C	37791	C	38166	C	38138	C	38149	C	38110	C	37792	C	37963	A
1109	IGS (trnS-UGA, psbZ)	LSC	38158	A	37811	A	38186	A	38158	A	38169	A	38130	A	37812	A	37983	C
1110	IGS (trnS-UGA, psbZ)	LSC	38201	A	37854	A	38231	A	38201	A	38212	A	38173	A	37855	A	38029	G
1111	IGS (trnS-UGA, psbZ)	LSC	38202	G	37855	G	38232	G	38202	G	38213	G	38174	A	37856	G	38030	G
1112	IGS (trnS-UGA, psbZ)	LSC	38232	G	37885	G	38262	G	38232	G	38243	G	38204	G	37886	A	38060	G
1113	psbZ	LSC	38339	T	37992	G	38369	T	38339	T	38350	T	38311	T	37993	T	38167	T
1114	psbZ	LSC	38399	A	38052	A	38429	A	38399	A	38410	A	38371	A	38053	C	38227	A
1115	psbZ	LSC	38426	T	38079	T	38456	T	38426	T	38437	T	38398	T	38080	C	38254	T
1116	IGS (psbZ, trnG-UCC)	LSC	38511	A	38164	A	38541	G	38511	A	38522	A	38483	G	38165	A	38342	A
1117	IGS (psbZ, trnG-UCC)	LSC	38555	G	38208	G	38585	C	38555	G	38566	G	38527	G	38209	G	38386	G
1118	IGS (psbZ, trnG-UCC)	LSC	38586	T	38239	C	38616	C	38586	C	38597	C	38558	C	38240	C	38417	C
1119	IGS (psbZ, trnG-UCC)	LSC	38628	A	38281	A	38651	A	38628	A	38639	A	38600	A	38282	A	38459	C
1120	IGS (psbZ, trnG-UCC)	LSC	38645	A	38298	A	38668	A	38645	A	38656	A	38617	A	38300	T	38476	A
1121	IGS (psbZ, trnG-UCC)	LSC	38649	C	38302	C	38672	C	38649	C	38660	C	38621	C	38304	C	38480	A
1122	IGS (psbZ, trnG-UCC)	LSC	38690	A	38343	A	38705	A	38690	A	38701	A	38654	A	38329	A	38523	C
1123	IGS (psbZ, trnG-UCC)	LSC	38718	C	38371	C	38733	C	38718	C	38729	C	38682	C	38357	C	38551	G
1124	IGS (psbZ, trnG-UCC)	LSC	38751	T	38404	T	38766	T	38751	T	38762	T	38715	G	38390	T	38584	T
1125	IGS (psbZ, trnG-UCC)	LSC	38759	A	38412	A	38774	A	38759	A	38770	A	38723	C	38398	A	38592	A
1126	IGS (psbZ, trnG-UCC)	LSC	38776	G	38429	G	38791	G	38776	G	38787	G	38740	G	38415	G	38609	C
1127	IGS (psbZ, trnG-UCC)	LSC	38782	A	38435	A	38797	A	38782	A	38793	A	38746	A	38421	A	38615	T
1128	IGS (psbZ, trnG-UCC)	LSC	38797	T	38450	T	38812	G	38797	T	38808	T	38761	T	38436	T	38630	T
1129	IGS (psbZ, trnG-UCC)	LSC	38802	T	38455	G	38817	T	38802	T	38813	A	38766	T	38441	T	38635	T
1130	IGS (psbZ, trnG-UCC)	LSC	38809	A	38462	C	38824	C	38809	C	38820	C	38773	C	38448	C	38642	C
1131	IGS (psbZ, trnG-UCC)	LSC	38823	G	38476	G	38838	G	38823	G	38834	G	38787	G	38462	G	38656	T
1132	IGS (psbZ, trnG-UCC)	LSC	38828	C	38481	A	38843	A	38828	C	38839	A	38792	A	38467	A	38661	A
1133	IGS (psbZ, trnG-UCC)	LSC	38835	T	38488	T	38850	T	38835	T	38846	T	38799	T	38474	T	38668	G
1134	IGS (psbZ, trnG-UCC)	LSC	38850	A	38503	A	38852	A	38850	A	38861	A	38814	C	38487	A	38683	C
1135	IGS (psbZ, trnG-UCC)	LSC	38855	T	38508	A	38857	T	38855	T	38866	T	38819	T	38492	T	38688	T
1136	IGS (psbZ, trnG-UCC)	LSC	38856	A	38509	A	38858	C	38856	A	38867	A	38820	A	38493	A	38689	A
1137	IGS (psbZ, trnG-UCC)	LSC	38859	T	38517	T	38865	A	38859	T	38875	T	38828	T	38496	T	38692	T
1138	IGS (psbZ, trnG-UCC)	LSC	38864	T	38522	T	38870	T	38864	T	38880	T	38833	A	38501	T	38697	T
1139	IGS (psbZ, trnG-UCC)	LSC	38865	T	38523	T	38871	C	38865	T	38881	T	38834	A	38502	T	38698	T
1140	IGS (psbZ, trnG-UCC)	LSC	38866	C	38524	C	38872	C	38866	C	38882	C	38835	G	38503	C	38699	C
1141	IGS (psbZ, trnG-UCC)	LSC	38867	T	38525	T	38873	T	38867	T	38883	T	38836	A	38504	T	38700	T
1142	IGS (psbZ, trnG-UCC)	LSC	38868	T	38526	T	38874	T	38868	T	38884	T	38837	A	38505	T	38701	T
1143	IGS (psbZ, trnG-UCC)	LSC	38891	G	38535	T	38883	T	38891	G	38893	T	38846	T	38514	T	38710	C
1144	IGS (psbZ, trnG-UCC)	LSC	38919	A	38563	G	38911	A	38919	A	38921	G	38880	A	38542	A	38738	A
1145	IGS (psbZ, trnG-UCC)	LSC	38949	T	38593	T	38941	T	38949	T	38951	T	38910	T	38572	T	38768	C
1146	IGS (psbZ, trnG-UCC)	LSC	38969	A	38613	A	38961	A	38969	A	38971	A	38930	A	38592	C	38788	C
1147	IGS (psbZ, trnG-UCC)	LSC	38979	C	38623	C	38971	C	38979	C	38981	C	38940	C	38602	T	38798	C
1148	IGS (psbZ, trnG-UCC)	LSC	38981	T	38625	T	38973	T	38981	T	38983	T	38942	T	38604	C	38800	T
1149	IGS (psbZ, trnG-UCC)	LSC	39031	A	38671	T	39019	A	39031	A	39029	T	38988	T	38650	A	38846	A
1150	IGS (trnG-UCC, trnfM-CAU)	LSC	39111	G	38751	G	39099	C	39111	G	39109	G	39068	G	38733	G	38928	G
1151	IGS (trnG-UCC, trnfM-CAU)	LSC	39162	T	38802	T	39150	T	39162	T	39160	T	39119	C	38784	T	38979	T
1152	IGS (trnG-UCC, trnfM-CAU)	LSC	39169	T	38809	T	39157	T	39169	G	39167	T	39126	T	38791	T	38986	T
1153	IGS (trnG-UCC, trnfM-CAU)	LSC	39200	A	38837	A	39194	A	39200	A	39204	A	39163	A	38828	T	39023	A
1154	IGS (trnG-UCC, trnfM-CAU)	LSC	39203	C	38840	A	39197	A	39203	C	39207	A	39166	A	38831	A	39026	A
1155	IGS (trnG-UCC, trnfM-CAU)	LSC	39208	A	38845	A	39202	A	39208	A	39212	A	39171	A	38836	C	39031	A
1156	IGS (trnG-UCC, trnfM-CAU)	LSC	39211	G	38848	T	39205	T	39211	T	39215	T	39174	T	38839	T	39034	T
1157	IGS (trnG-UCC, trnfM-CAU)	LSC	39222	T	38859	T	39216	T	39222	T	39226	T	39185	T	38850	A	39045	T
1158	IGS (trnfM-CAU, rps14)	LSC	39425	C	39062	C	39419	C	39425	C	39429	T	39386	C	39053	C	39248	C
1159	IGS (trnfM-CAU, rps14)	LSC	39448	C	39085	G	39442	G	39448	G	39452	G	39409	G	39076	G	39271	G
1160	IGS (trnfM-CAU, rps14)	LSC	39470	T	39107	T	39464	T	39470	T	39474	T	39431	T	39098	G	39293	T
1161	rps14	LSC	39793	T	39430	C	39787	T	39793	T	39791	C	39748	T	39421	C	39616	C
1162	rps14	LSC	39795	A	39432	C	39789	A	39795	A	39793	C	39750	A	39423	A	39618	A
1163	IGS (rps14, psaB)	LSC	39814	G	39451	G	39808	G	39814	G	39812	G	39769	G	39442	G	39637	T
1164	IGS (rps14, psaB)	LSC	39815	C	39452	C	39809	C	39815	C	39813	C	39770	C	39443	C	39638	T
1165	IGS (rps14, psaB)	LSC	39821	T	39458	T	39815	T	39821	T	39819	T	39776	T	39449	C	39644	T
1166	IGS (rps14, psaB)	LSC	39830	A	39467	G	39824	G	39830	G	39828	G	39785	G	39458	G	39653	G
1167	IGS (rps14, psaB)	LSC	39854	T	39491	T	39848	T	39854	T	39852	T	39809	T	39484	G	39677	T
1168	IGS (rps14, psaB)	LSC	39897	G	39534	G	39891	G	39897	T	39895	G	39852	G	39527	G	39720	G
1169	IGS (rps14, psaB)	LSC	39910	C	39547	C	39904	C	39910	C	39908	C	39865	C	39540	T	39733	C
1170	IGS (rps14, psaB)	LSC	39941	A	39576	A	39939	A	39941	A	39943	A	39891	C	39568	A	39763	A
1171	IGS (rps14, psaB)	LSC	39942	G	39577	G	39940	G	39942	G	39944	G	39892	A	39569	G	39764	G
1172	psaB	LSC	40224	A	39859	A	40222	A	40224	A	40226	A	40174	A	39851	A	40046	G
1173	psaB	LSC	40233	A	39868	A	40231	A	40233	A	40235	A	40183	C	39860	A	40055	A
1174	psaB	LSC	40335	G	39970	G	40333	G	40335	G	40337	G	40285	G	39962	G	40157	A
1175	psaB	LSC	40455	A	40090	A	40453	G	40455	A	40457	A	40405	A	40082	A	40277	A
1176	psaB	LSC	40464	C	40099	C	40462	C	40464	C	40466	C	40414	C	40091	T	40286	C
1177	psaB	LSC	40638	A	40273	G	40636	A	40638	A	40640	A	40588	A	40265	A	40460	A
1178	psaB	LSC	40649	C	40284	T	40647	C	40649	T	40651	T	40599	T	40276	C	40471	T
1179	psaB	LSC	40737	C	40372	C	40735	C	40737	C	40739	C	40687	T	40364	C	40559	C
1180	psaB	LSC	40779	A	40414	A	40777	A	40779	A	40781	A	40729	G	40406	A	40601	A
1181	psaB	LSC	40896	A	40531	A	40894	A	40896	A	40898	A	40846	A	40523	A	40718	G
1182	psaB	LSC	40899	G	40534	G	40897	G	40899	G	40901	G	40849	G	40526	G	40721	A
1183	psaB	LSC	41049	A	40684	A	41047	A	41049	A	41051	A	40999	A	40676	G	40871	A
1184	psaB	LSC	41064	T	40699	T	41062	T	41064	T	41066	T	41014	T	40691	T	40886	C
1185	psaB	LSC	41256	C	40891	C	41254	C	41256	C	41258	C	41206	C	40883	C	41078	A
1186	psaB	LSC	41289	A	40924	A	41287	G	41289	A	41291	A	41239	A	40916	A	41111	A
1187	psaB	LSC	41355	C	40990	C	41353	C	41355	C	41357	C	41305	C	40982	C	41177	T
1188	psaB	LSC	41391	A	41026	A	41389	A	41391	A	41393	A	41341	A	41018	A	41213	G
1189	psaB	LSC	41415	A	41050	A	41413	A	41415	A	41417	A	41365	G	41042	A	41237	A
1190	psaB	LSC	41493	G	41128	G	41491	C	41493	G	41495	G	41443	G	41120	G	41315	G
1191	psaB	LSC	41532	G	41167	G	41530	G	41532	G	41534	G	41482	G	41159	A	41354	G
1192	psaB	LSC	41544	G	41179	G	41542	C	41544	G	41546	G	41494	G	41171	G	41366	G
1193	psaB	LSC	41559	T	41194	G	41557	G	41559	T	41561	G	41509	G	41186	G	41381	G
1194	psaB	LSC	41710	G	41345	C	41708	G	41710	G	41712	G	41660	G	41337	G	41532	G
1195	psaB	LSC	41748	A	41383	A	41746	A	41748	A	41750	A	41698	A	41375	G	41570	A
1196	psaB	LSC	41829	C	41464	C	41827	T	41829	C	41831	C	41779	C	41456	C	41651	C
1197	psaB	LSC	41847	C	41482	C	41845	C	41847	C	41849	C	41797	C	41474	T	41669	C
1198	psaB	LSC	41889	A	41524	A	41887	A	41889	A	41891	G	41839	A	41516	A	41711	A
1199	psaB	LSC	42027	A	41662	A	42025	A	42027	A	42029	A	41977	A	41654	A	41849	T
1200	psaB	LSC	42033	C	41668	C	42031	C	42033	C	42035	C	41983	C	41660	T	41855	C
1201	psaB	LSC	42132	T	41767	T	42130	T	42132	T	42134	T	42082	T	41759	T	41954	C
1202	psaA	LSC	42361	A	41996	G	42359	G	42361	A	42363	G	42311	G	41988	A	42183	A
1203	psaA	LSC	42367	G	42002	G	42365	G	42367	G	42369	G	42317	G	41994	G	42189	A
1204	psaA	LSC	42475	T	42110	T	42473	T	42475	T	42477	T	42425	T	42102	T	42297	C
1205	psaA	LSC	42673	A	42308	G	42671	G	42673	A	42675	G	42623	G	42300	G	42495	G
1206	psaA	LSC	42871	T	42506	T	42869	T	42871	T	42873	T	42821	T	42498	G	42693	T
1207	psaA	LSC	42898	A	42533	A	42896	A	42898	A	42900	A	42848	A	42525	G	42720	C
1208	psaA	LSC	42904	C	42539	C	42902	A	42904	C	42906	T	42854	C	42531	C	42726	C
1209	psaA	LSC	42921	T	42556	T	42919	T	42921	T	42923	T	42871	T	42548	T	42743	G
1210	psaA	LSC	42952	A	42587	A	42950	A	42952	A	42954	A	42902	A	42579	A	42774	G
1211	psaA	LSC	43039	C	42674	C	43037	T	43039	C	43041	C	42989	T	42666	C	42861	C
1212	psaA	LSC	43114	G	42749	G	43112	G	43114	A	43116	G	43064	G	42741	G	42936	G
1213	psaA	LSC	43174	A	42809	C	43172	A	43174	A	43176	C	43124	A	42801	A	42996	A
1214	psaA	LSC	43261	C	42896	C	43259	C	43261	C	43263	C	43211	C	42888	C	43083	T
1215	psaA	LSC	43513	T	43148	A	43511	T	43513	T	43515	T	43463	T	43140	T	43335	T
1216	psaA	LSC	43783	T	43418	T	43781	T	43783	T	43785	T	43733	T	43410	G	43605	T
1217	psaA	LSC	43925	G	43560	G	43923	G	43925	C	43927	G	43875	G	43552	G	43747	G
1218	psaA	LSC	43984	A	43619	A	43982	G	43984	A	43986	A	43934	A	43611	A	43806	A
1219	psaA	LSC	44103	C	43738	C	44101	C	44103	C	44105	T	44053	C	43730	C	43925	C
1220	psaA	LSC	44116	G	43751	G	44114	G	44116	G	44118	G	44066	G	43743	G	43938	A
1221	psaA	LSC	44119	G	43754	G	44117	G	44119	G	44121	G	44069	G	43746	G	43941	A
1222	psaA	LSC	44248	G	43883	G	44246	A	44248	G	44250	G	44198	G	43875	G	44070	G
1223	psaA	LSC	44359	G	43994	G	44357	G	44359	G	44361	A	44309	G	43986	G	44181	G
1224	psaA	LSC	44398	T	44033	T	44396	T	44398	T	44400	T	44348	T	44025	T	44220	G
1225	IGS (psaA, ycf3)	LSC	44459	A	44094	A	44457	A	44459	A	44461	A	44409	C	44086	A	44281	A
1226	IGS (psaA, ycf3)	LSC	44486	T	44121	T	44484	T	44486	T	44488	T	44436	T	44113	T	44308	A
1227	IGS (psaA, ycf3)	LSC	44509	T	44144	T	44507	T	44509	G	44511	T	44459	T	44136	T	44331	T
1228	IGS (psaA, ycf3)	LSC	44572	T	44207	T	44570	T	44572	A	44574	T	44522	T	44199	T	44394	T
1229	IGS (psaA, ycf3)	LSC	44626	A	44261	A	44624	A	44626	A	44628	A	44576	G	44253	A	44448	A
1230	IGS (psaA, ycf3)	LSC	44649	G	44284	G	44647	A	44649	G	44651	G	44599	A	44276	G	44471	T
1231	IGS (psaA, ycf3)	LSC	44650	A	44285	A	44648	A	44650	A	44652	G	44600	A	44277	A	44472	A
1232	IGS (psaA, ycf3)	LSC	44693	C	44328	C	44691	C	44693	C	44695	C	44643	C	44320	C	44515	T
1233	IGS (psaA, ycf3)	LSC	44694	A	44329	A	44692	C	44694	A	44696	A	44644	A	44321	A	44516	A
1234	IGS (psaA, ycf3)	LSC	44710	T	44346	T	44709	T	44710	T	44713	T	44662	T	44338	T	44534	C
1235	IGS (psaA, ycf3)	LSC	44744	C	44380	T	44743	T	44744	T	44747	T	44696	T	44372	T	44568	T
1236	IGS (psaA, ycf3)	LSC	44753	T	44389	T	44752	T	44753	T	44756	T	44705	T	44381	G	44577	T
1237	IGS (psaA, ycf3)	LSC	44756	A	44392	A	44755	A	44756	A	44759	A	44708	A	44384	A	44580	C
1238	IGS (psaA, ycf3)	LSC	44767	C	44403	C	44766	C	44767	C	44770	C	44719	C	44395	C	44591	T
1239	IGS (psaA, ycf3)	LSC	44779	C	44408	T	44771	T	44779	C	44775	T	44724	T	44400	C	44596	C
1240	IGS (psaA, ycf3)	LSC	44800	T	44424	T	44787	T	44800	T	44791	T	44740	G	44421	T	44617	T
1241	IGS (psaA, ycf3)	LSC	44823	A	44447	A	44810	A	44823	A	44814	A	44763	A	44449	A	44640	G
1242	IGS (psaA, ycf3)	LSC	44831	T	44455	T	44818	T	44831	T	44822	T	44771	T	44457	T	44648	C
1243	IGS (psaA, ycf3)	LSC	44880	T	44504	T	44867	C	44880	T	44864	T	44826	C	44506	T	44697	T
1244	IGS (psaA, ycf3)	LSC	44884	A	44508	T	44871	A	44884	A	44868	A	44830	A	44510	A	44701	A
1245	IGS (psaA, ycf3)	LSC	44885	T	44509	A	44872	T	44885	T	44869	T	44831	T	44511	T	44702	T
1246	IGS (psaA, ycf3)	LSC	44886	T	44510	T	44873	T	44886	A	44870	T	44832	T	44512	T	44703	T
1247	IGS (psaA, ycf3)	LSC	44887	A	44511	A	44874	A	44887	T	44871	A	44833	A	44513	A	44704	A
1248	IGS (psaA, ycf3)	LSC	44903	T	44519	T	44892	T	44903	T	44886	T	44845	A	44533	T	44719	T
1249	IGS (psaA, ycf3)	LSC	45069	A	44685	A	45058	C	45069	A	45052	A	45011	A	44693	A	44892	C
1250	ycf3-exon3	LSC	45099	A	44715	C	45088	C	45099	A	45082	C	45041	C	44723	A	44922	A
1251	ycf3-exon3	LSC	45103	C	44719	C	45092	C	45103	C	45086	C	45045	C	44727	C	44926	T
1252	ycf3-exon3	LSC	45144	A	44760	A	45133	A	45144	A	45127	A	45086	A	44768	A	44967	G
1253	ycf3-exon3	LSC	45210	A	44826	A	45199	A	45210	A	45193	A	45152	A	44834	A	45033	C
1254	ycf3-intron 2	LSC	45331	A	44947	A	45320	A	45331	A	45314	A	45273	A	44955	C	45154	A
1255	ycf3-intron 2	LSC	45358	C	44974	C	45347	C	45358	C	45341	C	45300	C	44982	C	45181	T
1256	ycf3-intron 2	LSC	45367	G	44983	T	45356	T	45367	G	45350	T	45309	T	44991	T	45190	T
1257	ycf3-intron 2	LSC	45434	C	45049	C	45424	C	45434	C	45416	C	45376	C	45058	A	45257	C
1258	ycf3-intron 2	LSC	45444	T	45059	T	45434	T	45444	T	45426	T	45386	T	45068	T	45267	G
1259	ycf3-intron 2	LSC	45484	G	45099	G	45474	G	45484	G	45466	G	45426	G	45108	G	45307	T
1260	ycf3-intron 2	LSC	45499	A	45114	A	45489	A	45499	A	45481	A	45441	A	45123	G	45322	A
1261	ycf3-intron 2	LSC	45512	T	45127	T	45502	T	45512	T	45494	T	45454	T	45136	C	45335	T
1262	ycf3-intron 2	LSC	45554	A	45169	G	45544	G	45554	G	45536	G	45496	G	45178	T	45377	G
1263	ycf3-intron 2	LSC	45605	A	45220	A	45595	A	45605	A	45587	A	45547	A	45229	A	45428	G
1264	ycf3-intron 2	LSC	45746	T	45361	C	45731	C	45746	C	45728	C	45688	C	45370	C	45570	C
1265	ycf3-intron 2	LSC	45808	A	45423	A	45793	G	45808	A	45790	A	45750	A	45432	A	45632	A
1266	ycf3-intron 2	LSC	45920	A	45535	C	45905	C	45920	C	45902	C	45862	C	45544	C	45744	C
1267	ycf3-intron 2	LSC	45921	T	45536	T	45906	T	45921	G	45903	T	45863	T	45545	T	45745	T
1268	ycf3-intron 2	LSC	45938	C	45553	C	45923	C	45938	C	45920	C	45880	T	45562	C	45762	C
1269	ycf3-exon 2	LSC	46025	T	45640	T	46010	T	46025	T	46007	T	45967	T	45649	C	45849	T
1270	ycf3-exon 2	LSC	46211	C	45826	C	46196	C	46211	C	46193	C	46153	C	45835	C	46035	G
1271	ycf3-intron 1	LSC	46275	T	45890	T	46260	T	46275	G	46257	T	46217	T	45899	T	46099	T
1272	ycf3-intron 1	LSC	46276	A	45891	A	46261	A	46276	A	46258	A	46218	A	45900	A	46100	T
1273	ycf3-intron 1	LSC	46336	G	45951	G	46321	G	46336	G	46318	G	46278	G	45967	G	46160	T
1274	ycf3-intron 1	LSC	46404	T	46019	C	46389	C	46404	C	46386	C	46346	C	46035	C	46228	C
1275	ycf3-intron 1	LSC	46413	A	46028	A	46398	A	46413	A	46395	A	46355	A	46044	A	46237	G
1276	ycf3-intron 1	LSC	46466	C	46081	C	46451	C	46466	C	46448	C	46408	C	46097	C	46290	T
1277	ycf3-intron 1	LSC	46506	A	46121	A	46491	A	46506	A	46488	A	46448	A	46137	A	46330	C
1278	ycf3-intron 1	LSC	46572	T	46187	T	46557	T	46572	T	46554	T	46514	T	46203	T	46396	G
1279	ycf3-intron 1	LSC	46584	C	46199	C	46569	C	46584	C	46566	C	46526	T	46215	C	46408	C
1280	ycf3-intron 1	LSC	46588	T	46203	T	46573	T	46588	T	46570	G	46530	T	46219	T	46412	T
1281	ycf3-intron 1	LSC	46694	G	46309	G	46679	G	46694	G	46676	A	46636	G	46325	G	46518	G
1282	ycf3-intron 1	LSC	46701	A	46316	A	46686	C	46701	A	46683	A	46643	C	46332	A	46525	A
1283	ycf3-intron 1	LSC	46708	T	46323	T	46693	C	46708	T	46690	T	46650	T	46339	T	46532	T
1284	ycf3-intron 1	LSC	46755	G	46370	G	46740	A	46755	G	46737	G	46697	G	46386	G	46579	G
1285	ycf3-intron 1	LSC	46761	T	46376	T	46746	T	46761	T	46743	T	46703	T	46392	T	46585	C
1286	ycf3-intron 1	LSC	46814	A	46429	C	46799	A	46814	A	46796	A	46756	A	46445	A	46638	A
1287	ycf3-intron 1	LSC	46915	A	46530	A	46900	A	46915	A	46897	A	46857	A	46546	A	46739	T
1288	ycf3-intron 1	LSC	46916	T	46531	T	46901	T	46916	T	46898	T	46858	T	46547	T	46740	A
1289	IGS (ycf3, trnS-GGA)	LSC	47100	T	46715	T	47085	T	47100	T	47082	T	47042	T	46731	T	46924	G
1290	IGS (ycf3, trnS-GGA)	LSC	47129	T	46744	T	47114	T	47129	T	47111	T	47071	T	46760	T	46953	C
1291	IGS (ycf3, trnS-GGA)	LSC	47155	A	46770	A	47140	C	47155	A	47137	A	47097	C	46786	A	46979	A
1292	IGS (ycf3, trnS-GGA)	LSC	47177	T	46792	T	47164	C	47177	T	47159	T	47119	T	46807	T	47000	T
1293	IGS (ycf3, trnS-GGA)	LSC	47240	C	46855	C	47227	C	47240	C	47222	C	47182	T	46846	C	47070	C
1294	IGS (ycf3, trnS-GGA)	LSC	47245	T	46860	T	47232	T	47245	T	47227	T	47187	T	46851	T	47075	G
1295	IGS (ycf3, trnS-GGA)	LSC	47306	T	46921	T	47293	T	47306	T	47288	T	47248	T	46912	T	47136	C
1296	IGS (ycf3, trnS-GGA)	LSC	47310	G	46925	G	47297	G	47310	G	47292	G	47252	G	46916	G	47140	A
1297	IGS (ycf3, trnS-GGA)	LSC	47398	C	47013	C	47385	C	47398	C	47380	A	47340	A	46942	C	47228	C
1298	IGS (ycf3, trnS-GGA)	LSC	47414	G	47029	G	47401	A	47414	G	47396	G	47356	G	46958	G	47244	G
1299	IGS (ycf3, trnS-GGA)	LSC	47416	A	47031	G	47403	G	47416	G	47398	G	47358	G	46960	G	47246	G
1300	IGS (ycf3, trnS-GGA)	LSC	47432	T	47047	T	47419	T	47432	T	47414	T	47374	T	46976	T	47262	C
1301	IGS (ycf3, trnS-GGA)	LSC	47443	T	47058	T	47430	T	47443	T	47425	T	47385	T	46987	T	47273	C
1302	IGS (ycf3, trnS-GGA)	LSC	47445	G	47060	G	47432	G	47445	G	47427	G	47387	G	46989	G	47275	T
1303	IGS (ycf3, trnS-GGA)	LSC	47462	A	47077	A	47449	A	47462	A	47444	A	47404	A	47006	C	47292	A
1304	IGS (ycf3, trnS-GGA)	LSC	47476	T	47091	T	47463	T	47476	G	47458	T	47418	T	47020	T	47306	T
1305	IGS (ycf3, trnS-GGA)	LSC	47490	A	47105	G	47477	G	47490	A	47472	G	47432	G	47034	G	47320	G
1306	IGS (ycf3, trnS-GGA)	LSC	47500	T	47115	T	47487	T	47500	T	47482	T	47442	C	47044	T	47330	T
1307	IGS (ycf3, trnS-GGA)	LSC	47535	C	47150	C	47522	C	47535	C	47517	C	47477	C	47079	C	47365	T
1308	IGS (ycf3, trnS-GGA)	LSC	47579	C	47194	A	47566	A	47579	C	47561	A	47521	A	47123	A	47410	A
1309	IGS (ycf3, trnS-GGA)	LSC	47615	A	47230	G	47602	A	47615	A	47597	G	47557	A	47159	A	47446	A
1310	IGS (ycf3, trnS-GGA)	LSC	47620	G	47235	G	47607	G	47620	G	47602	G	47562	G	47164	G	47451	T
1311	IGS (ycf3, trnS-GGA)	LSC	47622	A	47237	C	47609	C	47622	A	47604	C	47564	C	47166	C	47453	C
1312	IGS (ycf3, trnS-GGA)	LSC	47668	A	47283	G	47646	G	47668	A	47650	G	47610	G	47207	G	47499	G
1313	IGS (ycf3, trnS-GGA)	LSC	47680	G	47295	G	47658	A	47680	G	47662	G	47622	G	47219	G	47511	G
1314	IGS (ycf3, trnS-GGA)	LSC	47721	C	47336	C	47704	C	47721	C	47703	C	47663	C	47260	C	47552	A
1315	IGS (ycf3, trnS-GGA)	LSC	47746	T	47361	T	47729	T	47746	T	47728	T	47689	T	47286	C	47579	T
1316	IGS (ycf3, trnS-GGA)	LSC	47827	C	47442	T	47802	C	47827	C	47809	T	47770	C	47367	C	47660	C
1317	IGS (ycf3, trnS-GGA)	LSC	47832	A	47447	A	47807	C	47832	A	47814	A	47775	A	47372	A	47665	A
1318	IGS (ycf3, trnS-GGA)	LSC	47869	G	47484	G	47844	G	47869	G	47851	A	47812	G	47409	G	47702	G
1319	IGS (ycf3, trnS-GGA)	LSC	47877	C	47492	C	47852	C	47877	C	47859	C	47820	C	47417	C	47710	T
1320	IGS (trnS-GGA, rps4)	LSC	48044	A	47659	A	48019	A	48044	A	48026	A	47987	A	47584	A	47877	C
1321	IGS (trnS-GGA, rps4)	LSC	48129	A	47744	A	48104	A	48129	A	48111	A	48072	A	47669	A	47954	G
1322	IGS (trnS-GGA, rps4)	LSC	48138	A	47753	A	48113	A	48138	A	48120	A	48081	A	47678	A	47963	C
1323	IGS (trnS-GGA, rps4)	LSC	48141	C	47756	C	48116	C	48141	C	48123	C	48084	C	47681	A	47966	C
1324	IGS (trnS-GGA, rps4)	LSC	48149	C	47764	C	48124	C	48149	C	48131	C	48092	C	47689	C	47974	T
1325	IGS (trnS-GGA, rps4)	LSC	48177	A	47792	A	48152	C	48177	A	48159	A	48120	A	47717	C	48002	A
1326	IGS (trnS-GGA, rps4)	LSC	48189	A	47804	A	48164	A	48189	A	48171	A	48132	C	47729	A	48014	A
1327	rps4	LSC	48399	C	48015	A	48375	A	48399	C	48381	A	48346	A	47942	A	48221	A
1328	rps4	LSC	48423	G	48039	G	48399	G	48423	G	48405	G	48370	G	47966	G	48245	A
1329	rps4	LSC	48441	T	48057	T	48417	T	48441	G	48423	T	48388	T	47984	T	48263	T
1330	rps4	LSC	48567	T	48183	G	48543	T	48567	T	48549	T	48514	T	48110	T	48389	T
1331	rps4	LSC	48582	A	48198	A	48558	A	48582	A	48564	A	48529	A	48125	A	48404	G
1332	rps4	LSC	48630	T	48246	T	48606	G	48630	T	48612	T	48577	T	48173	T	48452	T
1333	rps4	LSC	48669	T	48285	T	48645	C	48669	T	48651	T	48616	T	48212	T	48491	T
1334	IGS (rps4, trnT-UGU)	LSC	48885	T	48501	T	48861	T	48885	G	48867	T	48832	T	48428	T	48707	T
1335	IGS (rps4, trnT-UGU)	LSC	48932	A	48548	A	48908	A	48932	A	48914	A	48879	A	48475	A	48754	C
1336	IGS (rps4, trnT-UGU)	LSC	49024	G	48640	G	49000	G	49024	G	49006	G	48971	G	48567	G	48846	A
1337	IGS (rps4, trnT-UGU)	LSC	49042	A	48658	T	49018	T	49042	A	49024	T	48989	T	48585	T	48864	T
1338	IGS (rps4, trnT-UGU)	LSC	49050	C	48666	C	49026	C	49050	C	49032	C	48997	C	48593	T	48872	C
1339	IGS (rps4, trnT-UGU)	LSC	49056	A	48672	A	49032	A	49056	A	49038	A	49003	C	48599	A	48878	A
1340	IGS (rps4, trnT-UGU)	LSC	49068	G	48684	G	49044	G	49068	G	49050	G	49015	G	48611	C	48890	G
1341	IGS (rps4, trnT-UGU)	LSC	49070	T	48686	T	49046	T	49070	T	49052	T	49017	T	48613	T	48892	C
1342	IGS (rps4, trnT-UGU)	LSC	49128	C	48744	G	49083	C	49128	C	49110	C	49054	C	48644	C	48950	C
1343	IGS (rps4, trnT-UGU)	LSC	49162	C	48778	C	49117	T	49162	C	49144	C	49088	C	48678	C	48984	C
1344	trnT-UGU	LSC	49178	A	48794	A	49133	G	49178	A	49160	A	49104	A	48694	A	49000	A
1345	IGS (trnT-UGU, trnL-UAA)	LSC	49257	G	48873	G	49212	G	49257	G	49239	G	49183	G	48773	G	49079	A
1346	IGS (trnT-UGU, trnL-UAA)	LSC	49291	T	48907	T	49246	C	49291	T	49273	T	49217	T	48807	T	49113	T
1347	IGS (trnT-UGU, trnL-UAA)	LSC	49294	G	48910	G	49249	G	49294	G	49276	G	49220	G	48810	G	49116	A
1348	IGS (trnT-UGU, trnL-UAA)	LSC	49356	A	48972	A	49311	A	49356	A	49338	A	49282	A	48872	A	49178	C
1349	IGS (trnT-UGU, trnL-UAA)	LSC	49364	G	48980	G	49319	A	49364	G	49346	G	49290	G	48880	G	49186	G
1350	IGS (trnT-UGU, trnL-UAA)	LSC	49374	A	48990	A	49329	A	49374	C	49356	A	49300	A	48890	A	49196	A
1351	IGS (trnT-UGU, trnL-UAA)	LSC	49412	A	49028	A	49367	G	49412	A	49394	A	49338	A	48928	A	49234	A
1352	IGS (trnT-UGU, trnL-UAA)	LSC	49453	G	49070	G	49408	G	49453	G	49435	G	49379	G	48969	G	49275	C
1353	IGS (trnT-UGU, trnL-UAA)	LSC	49480	A	49097	A	49435	A	49480	A	49462	A	49406	A	48996	C	49302	A
1354	IGS (trnT-UGU, trnL-UAA)	LSC	49504	A	49121	T	49467	A	49504	A	49486	A	49436	T	49020	A	49326	A
1355	IGS (trnT-UGU, trnL-UAA)	LSC	49505	A	49122	A	49468	A	49505	A	49487	A	49437	T	49021	A	49327	A
1356	IGS (trnT-UGU, trnL-UAA)	LSC	49510	T	49127	T	49473	T	49510	T	49492	T	49442	A	49026	T	49332	T
1357	IGS (trnT-UGU, trnL-UAA)	LSC	49511	C	49128	C	49474	C	49511	C	49493	C	49443	A	49027	C	49333	C
1358	IGS (trnT-UGU, trnL-UAA)	LSC	49513	T	49130	T	49476	T	49513	T	49495	T	49445	C	49029	T	49335	T
1359	IGS (trnT-UGU, trnL-UAA)	LSC	49528	G	49145	A	49491	G	49528	G	49510	G	49460	G	49044	G	49350	G
1360	IGS (trnT-UGU, trnL-UAA)	LSC	49534	C	49151	C	49497	C	49534	C	49516	C	49466	C	49050	A	49356	C
1361	IGS (trnT-UGU, trnL-UAA)	LSC	49562	G	49179	G	49525	C	49562	G	49544	G	49494	G	49078	G	49384	G
1362	IGS (trnT-UGU, trnL-UAA)	LSC	49608	T	49225	G	49571	G	49608	T	49590	G	49540	G	49124	T	49430	T
1363	IGS (trnT-UGU, trnL-UAA)	LSC	49622	C	49239	A	49585	C	49622	C	49604	C	49554	C	49138	C	49444	C
1364	IGS (trnT-UGU, trnL-UAA)	LSC	49635	C	49252	C	49598	C	49635	C	49617	C	49567	C	49151	T	49457	C
1365	IGS (trnT-UGU, trnL-UAA)	LSC	49636	T	49253	T	49599	T	49636	T	49618	T	49568	T	49152	G	49458	T
1366	IGS (trnT-UGU, trnL-UAA)	LSC	49642	C	49259	A	49605	A	49642	A	49624	A	49574	C	49158	A	49464	A
1367	IGS (trnT-UGU, trnL-UAA)	LSC	49654	C	49271	C	49617	C	49654	C	49636	C	49586	C	49170	C	49476	A
1368	IGS (trnT-UGU, trnL-UAA)	LSC	49660	A	49277	A	49623	G	49660	A	49642	A	49592	A	49176	A	49482	A
1369	IGS (trnT-UGU, trnL-UAA)	LSC	49710	C	49327	C	49673	C	49710	C	49692	C	49600	T	49226	C	49529	C
1370	IGS (trnT-UGU, trnL-UAA)	LSC	49712	T	49329	T	49675	T	49712	T	49694	T	49602	G	49228	T	49531	T
1371	IGS (trnT-UGU, trnL-UAA)	LSC	49715	G	49332	G	49678	G	49715	G	49697	G	49605	T	49231	T	49534	G
1372	IGS (trnT-UGU, trnL-UAA)	LSC	49749	A	49366	A	49712	A	49749	A	49731	A	49639	A	49265	A	49572	T
1373	IGS (trnT-UGU, trnL-UAA)	LSC	49750	T	49367	T	49713	T	49750	T	49732	T	49640	T	49266	T	49573	A
1374	IGS (trnT-UGU, trnL-UAA)	LSC	49805	G	49434	A	49768	G	49805	G	49799	G	49695	G	49321	G	49653	G
1375	IGS (trnT-UGU, trnL-UAA)	LSC	49819	G	49448	G	49782	G	49819	T	49813	G	49709	G	49335	G	49705	G
1376	IGS (trnT-UGU, trnL-UAA)	LSC	49872	A	49501	C	49835	A	49872	A	49866	C	49762	A	49388	A	49758	A
1377	IGS (trnT-UGU, trnL-UAA)	LSC	49878	T	49507	T	49841	T	49878	C	49872	T	49768	T	49394	T	49764	T
1378	IGS (trnT-UGU, trnL-UAA)	LSC	49879	A	49508	A	49842	A	49879	A	49873	A	49769	A	49395	A	49765	G
1379	IGS (trnT-UGU, trnL-UAA)	LSC	49921	T	49550	T	49884	C	49921	T	49915	T	49811	C	49437	T	49807	T
1380	IGS (trnT-UGU, trnL-UAA)	LSC	49951	T	49580	G	49914	G	49951	T	49945	G	49841	G	49467	T	49837	T
1381	IGS (trnT-UGU, trnL-UAA)	LSC	49976	T	49605	G	49939	T	49976	T	49970	T	49866	T	49492	T	49862	T
1382	IGS (trnT-UGU, trnL-UAA)	LSC	49982	C	49611	C	49945	C	49982	C	49976	C	49872	C	49498	T	49868	C
1383	IGS (trnT-UGU, trnL-UAA)	LSC	49994	C	49623	G	49957	C	49994	C	49988	G	49884	C	49510	C	49880	C
1384	IGS (trnT-UGU, trnL-UAA)	LSC	50081	C	49710	A	50044	A	50081	A	50075	A	49971	A	49597	A	49966	A
1385	IGS (trnT-UGU, trnL-UAA)	LSC	50145	G	49774	A	50108	A	50145	A	50139	A	50035	G	49661	G	50030	A
1386	IGS (trnT-UGU, trnL-UAA)	LSC	50188	G	49817	A	50151	A	50188	A	50182	A	50078	A	49704	A	50073	A
1387	IGS (trnT-UGU, trnL-UAA)	LSC	50189	G	49818	G	50152	G	50189	G	50183	G	50079	G	49705	G	50074	A
1388	IGS (trnT-UGU, trnL-UAA)	LSC	50231	C	49860	C	50194	C	50231	C	50225	C	50121	A	49747	C	50116	C
1389	IGS (trnT-UGU, trnL-UAA)	LSC	50236	G	49865	G	50199	G	50236	G	50230	G	50126	A	49752	G	50121	G
1390	IGS (trnT-UGU, trnL-UAA)	LSC	50242	G	49871	G	50205	G	50242	G	50236	G	50132	G	49758	T	50127	G
1391	IGS (trnT-UGU, trnL-UAA)	LSC	50261	G	49890	G	50225	G	50261	G	50255	G	50151	A	49777	G	50146	G
1392	IGS (trnT-UGU, trnL-UAA)	LSC	50284	C	49913	C	50248	C	50284	C	50278	C	50174	C	49800	C	50169	T
1393	trnL-UAA-exon 1	LSC	50302	A	49931	A	50266	A	50302	A	50296	A	50192	A	49818	A	50187	G
1394	trnL-UAA-intron 1	LSC	50354	G	49983	A	50318	G	50354	G	50348	A	50244	G	49870	G	50239	G
1395	trnL-UAA-intron 1	LSC	50376	T	50005	T	50340	T	50376	T	50370	T	50266	T	49892	T	50261	G
1396	trnL-UAA-intron 1	LSC	50442	G	50071	T	50406	T	50442	G	50436	T	50332	T	49958	G	50327	G
1397	trnL-UAA-intron 1	LSC	50473	A	50102	A	50437	A	50473	A	50467	A	50363	A	49989	A	50358	C
1398	trnL-UAA-intron 1	LSC	50536	T	50171	T	50506	T	50536	T	50536	T	50432	T	50058	T	50427	G
1399	trnL-UAA-intron 1	LSC	50538	A	50173	G	50508	A	50538	A	50538	A	50434	A	50060	A	50429	A
1400	trnL-UAA-intron 1	LSC	50546	G	50181	G	50516	G	50546	G	50546	G	50442	T	50068	G	50437	G
1401	trnL-UAA-intron 1	LSC	50611	G	50246	G	50581	G	50611	G	50611	G	50500	G	50133	A	50502	G
1402	trnL-UAA-intron 1	LSC	50614	C	50249	C	50584	C	50614	C	50614	T	50503	C	50136	C	50505	C
1403	trnL-UAA-intron 1	LSC	50616	G	50251	G	50586	G	50616	G	50616	G	50505	G	50138	G	50507	C
1404	trnL-UAA-intron 1	LSC	50654	G	50289	G	50624	G	50654	G	50654	G	50543	G	50176	T	50545	G
1405	trnL-UAA-intron 1	LSC	50772	G	50407	G	50742	C	50772	G	50772	G	50661	G	50294	G	50663	G
1406	trnL-UAA-intron 1	LSC	50832	A	50467	A	50802	A	50832	A	50832	A	50721	A	50354	C	50723	A
1407	IGS (trnL-UAA, trnF-GAA)	LSC	50905	G	50540	G	50875	G	50905	G	50905	G	50793	G	50427	A	50796	G
1408	IGS (trnL-UAA, trnF-GAA)	LSC	50920	T	50555	T	50890	T	50920	T	50920	T	50808	T	50442	T	50811	C
1409	IGS (trnL-UAA, trnF-GAA)	LSC	50977	A	50612	G	50947	G	50977	G	50977	G	50865	G	50499	G	50873	G
1410	IGS (trnL-UAA, trnF-GAA)	LSC	50981	C	50616	C	50951	C	50981	C	50981	C	50869	T	50503	C	50877	C
1411	IGS (trnL-UAA, trnF-GAA)	LSC	50984	A	50619	A	50954	C	50984	A	50984	A	50872	A	50506	A	50880	A
1412	IGS (trnL-UAA, trnF-GAA)	LSC	50992	T	50627	T	50962	T	50992	C	50992	T	50880	T	50514	T	50888	T
1413	IGS (trnL-UAA, trnF-GAA)	LSC	51019	A	50654	A	50989	C	51019	A	51019	A	50907	A	50541	A	50915	T
1414	IGS (trnL-UAA, trnF-GAA)	LSC	51020	A	50655	A	50990	T	51020	A	51020	A	50908	A	50542	A	50916	A
1415	IGS (trnL-UAA, trnF-GAA)	LSC	51025	T	50660	G	50995	G	51025	G	51025	G	50913	G	50547	G	50921	G
1416	IGS (trnL-UAA, trnF-GAA)	LSC	51031	C	50666	C	51001	C	51031	C	51031	C	50919	C	50553	C	50927	T
1417	IGS (trnL-UAA, trnF-GAA)	LSC	51058	G	50693	G	51028	G	51058	G	51058	G	50946	T	50580	G	50954	G
1418	IGS (trnL-UAA, trnF-GAA)	LSC	51071	C	50698	C	51041	C	51071	C	51071	C	50959	C	50593	C	50967	T
1419	IGS (trnL-UAA, trnF-GAA)	LSC	51127	C	50754	A	51097	A	51127	C	51127	A	51015	A	50649	A	51023	A
1420	IGS (trnL-UAA, trnF-GAA)	LSC	51141	A	50768	G	51111	G	51141	A	51141	G	51029	G	50663	A	51037	A
1421	IGS (trnL-UAA, trnF-GAA)	LSC	51149	G	50776	G	51119	G	51149	G	51149	G	51037	G	50671	T	51045	G
1422	IGS (trnL-UAA, trnF-GAA)	LSC	51176	C	50803	A	51146	A	51176	C	51176	A	51065	A	50698	A	51072	A
1423	IGS (trnL-UAA, trnF-GAA)	LSC	51217	A	50844	A	51187	A	51217	A	51217	G	51106	A	50739	A	51113	A
1424	IGS (trnL-UAA, trnF-GAA)	LSC	51227	A	50854	A	51197	G	51227	A	51227	A	51116	A	50749	A	51123	A
1425	IGS (trnF-GAA, ndhJ)	LSC	51314	G	50941	G	51284	G	51314	G	51314	G	51203	G	50836	T	51210	G
1426	IGS (trnF-GAA, ndhJ)	LSC	51333	T	50960	T	51303	T	51333	G	51333	T	51222	T	50855	T	51229	T
1427	IGS (trnF-GAA, ndhJ)	LSC	51339	G	50966	A	51309	A	51339	G	51339	A	51228	A	50861	A	51235	A
1428	IGS (trnF-GAA, ndhJ)	LSC	51342	T	50969	T	51312	T	51342	T	51342	T	51231	T	50864	G	51238	T
1429	IGS (trnF-GAA, ndhJ)	LSC	51350	C	50977	C	51320	C	51350	C	51350	C	51239	C	50872	C	51246	G
1430	IGS (trnF-GAA, ndhJ)	LSC	51354	C	50981	C	51324	C	51354	G	51354	C	51243	C	50876	C	51250	C
1431	IGS (trnF-GAA, ndhJ)	LSC	51393	T	51020	T	51363	T	51393	T	51393	T	51282	T	50915	G	51289	T
1432	IGS (trnF-GAA, ndhJ)	LSC	51411	T	51038	T	51381	C	51411	T	51411	T	51300	T	50933	T	51307	T
1433	IGS (trnF-GAA, ndhJ)	LSC	51418	C	51045	C	51388	C	51418	A	51418	C	51307	C	50940	T	51314	C
1434	IGS (trnF-GAA, ndhJ)	LSC	51443	G	51070	G	51413	G	51443	G	51443	G	51332	G	50965	G	51339	A
1435	IGS (trnF-GAA, ndhJ)	LSC	51502	T	51129	T	51473	T	51502	T	51502	T	51390	T	51023	T	51399	C
1436	IGS (trnF-GAA, ndhJ)	LSC	51532	C	51159	C	51503	C	51532	C	51532	C	51416	C	51053	C	51429	T
1437	IGS (trnF-GAA, ndhJ)	LSC	51540	T	51167	G	51511	G	51540	T	51540	G	51424	G	51061	T	51437	T
1438	IGS (trnF-GAA, ndhJ)	LSC	51578	A	51205	C	51549	C	51578	A	51578	C	51462	C	51099	A	51475	A
1439	IGS (trnF-GAA, ndhJ)	LSC	51582	G	51209	G	51553	G	51582	G	51582	G	51466	G	51103	G	51479	A
1440	IGS (trnF-GAA, ndhJ)	LSC	51599	G	51226	T	51570	T	51599	G	51599	T	51483	T	51120	T	51496	T
1441	IGS (trnF-GAA, ndhJ)	LSC	51624	C	51251	T	51595	C	51624	C	51624	C	51508	A	51145	C	51516	C
1442	IGS (trnF-GAA, ndhJ)	LSC	51638	C	51265	T	51609	T	51638	C	51632	T	51522	T	51159	C	51530	C
1443	IGS (trnF-GAA, ndhJ)	LSC	51649	T	51276	T	51620	C	51649	T	51643	T	51533	T	51170	T	51541	T
1444	IGS (trnF-GAA, ndhJ)	LSC	51651	T	51278	A	51622	A	51651	A	51645	A	51535	A	51172	A	51543	A
1445	IGS (trnF-GAA, ndhJ)	LSC	51712	A	51363	G	51707	G	51712	G	51730	G	51620	G	51257	G	51628	G
1446	IGS (trnF-GAA, ndhJ)	LSC	51725	A	51376	A	51720	A	51725	A	51743	A	51633	C	51270	A	51641	A
1447	IGS (trnF-GAA, ndhJ)	LSC	51759	T	51410	G	51754	G	51759	T	51777	G	51667	G	51304	G	51675	G
1448	IGS (trnF-GAA, ndhJ)	LSC	51774	G	51425	G	51769	T	51774	G	51793	G	51682	G	51319	G	51690	G
1449	IGS (trnF-GAA, ndhJ)	LSC	51775	A	51426	C	51770	A	51775	A	51794	A	51683	A	51320	A	51691	A
1450	IGS (trnF-GAA, ndhJ)	LSC	51794	C	51445	T	51789	T	51794	C	51813	T	51702	T	51339	T	51710	T
1451	IGS (trnF-GAA, ndhJ)	LSC	51802	C	51453	C	51797	C	51802	C	51821	C	51710	C	51347	C	51718	T
1452	IGS (trnF-GAA, ndhJ)	LSC	51808	C	51459	C	51803	C	51808	C	51827	A	51716	C	51353	C	51724	C
1453	IGS (trnF-GAA, ndhJ)	LSC	51809	G	51460	T	51804	T	51809	T	51828	T	51717	T	51354	T	51725	T
1454	IGS (trnF-GAA, ndhJ)	LSC	51863	A	51514	A	51858	A	51863	A	51882	A	51771	A	51408	A	51779	G
1455	IGS (trnF-GAA, ndhJ)	LSC	51918	T	51569	T	51913	T	51918	T	51937	T	51826	G	51463	T	51834	T
1456	ndhJ	LSC	52111	C	51762	C	52106	T	52111	C	52130	C	52019	C	51656	C	52021	C
1457	ndhJ	LSC	52279	T	51930	T	52274	C	52279	T	52298	T	52187	T	51824	T	52189	T
1458	ndhJ	LSC	52327	A	51978	A	52322	A	52327	A	52346	A	52235	A	51872	C	52237	A
1459	IGS (ndhJ, ndhK)	LSC	52517	G	52168	G	52512	G	52517	G	52536	G	52420	G	52062	G	52427	T
1460	IGS (ndhJ, ndhK)	LSC	52531	A	52182	A	52526	A	52531	A	52550	A	52434	A	52076	A	52441	T
1461	ndhK	LSC	52549	G	52200	A	52544	A	52549	G	52568	A	52452	A	52094	A	52459	A
1462	ndhK	LSC	52552	A	52203	A	52547	A	52552	G	52571	A	52455	A	52097	A	52462	A
1463	ndhK	LSC	52620	C	52271	C	52615	C	52620	C	52639	C	52523	T	52165	C	52530	C
1464	ndhK	LSC	52626	A	52277	A	52621	A	52626	A	52645	A	52529	A	52171	C	52536	A
1465	ndhK	LSC	52639	T	52290	T	52634	C	52639	T	52658	T	52542	T	52184	T	52549	T
1466	ndhK	LSC	52643	T	52294	C	52638	C	52643	T	52662	C	52546	C	52188	C	52553	T
1467	ndhK	LSC	52665	G	52316	G	52660	A	52665	G	52684	G	52568	G	52210	G	52575	G
1468	ndhK	LSC	52677	A	52328	A	52672	A	52677	G	52696	A	52580	A	52222	A	52587	A
1469	ndhK	LSC	52748	A	52399	A	52743	A	52748	C	52767	A	52651	A	52293	A	52658	A
1470	ndhK	LSC	52800	T	52451	T	52795	T	52800	T	52819	T	52703	T	52345	T	52710	A
1471	ndhK	LSC	52899	T	52550	C	52894	C	52899	T	52918	C	52802	C	52444	T	52809	T
1472	ndhK	LSC	52902	T	52553	T	52897	T	52902	T	52921	T	52805	T	52447	T	52812	G
1473	ndhK	LSC	52923	G	52574	T	52918	T	52923	G	52942	T	52826	T	52468	G	52833	G
1474	ndhK	LSC	52944	T	52595	T	52939	T	52944	T	52963	T	52847	T	52489	C	52854	T
1475	ndhK	LSC	52956	A	52607	A	52951	A	52956	A	52975	A	52859	G	52501	A	52866	A
1476	ndhK	LSC	53007	T	52658	T	53002	T	53007	T	53026	T	52910	T	52552	C	52917	T
1477	ndhK	LSC	53157	G	52808	G	53152	G	53157	G	53176	G	53060	G	52702	A	53067	G
1478	ndhK	LSC	53211	C	52862	C	53206	G	53211	G	53230	C	53114	G	52756	C	53121	G
1479	ndhK	LSC	53264	C	52915	C	53259	C	53264	C	53283	C	53167	C	52809	T	53174	C
1480	ndhK, ndhC	LSC	53359	T	53010	T	53354	T	53359	T	53378	T	53262	T	52904	T	53269	C
1481	ndhC	LSC	53564	T	53215	T	53559	T	53564	T	53583	T	53467	A	53109	T	53474	T
1482	IGS (ndhC, trnV-UAC)	LSC	53719	C	53363	C	53714	C	53719	C	53738	C	53622	C	53264	T	53629	C
1483	IGS (ndhC, trnV-UAC)	LSC	53742	A	53386	G	53737	G	53742	G	53761	G	53645	G	53287	G	53647	G
1484	IGS (ndhC, trnV-UAC)	LSC	53750	T	53394	T	53745	T	53750	T	53769	T	53653	T	53295	T	53655	G
1485	IGS (ndhC, trnV-UAC)	LSC	53794	C	53438	C	53789	C	53794	C	53813	C	53697	C	53339	C	53699	G
1486	IGS (ndhC, trnV-UAC)	LSC	53809	T	53453	C	53804	C	53809	C	53828	C	53712	C	53354	C	53714	C
1487	IGS (ndhC, trnV-UAC)	LSC	53835	T	53479	G	53830	G	53835	G	53854	G	53738	G	53380	G	53740	G
1488	IGS (ndhC, trnV-UAC)	LSC	53865	C	53509	C	53860	C	53865	A	53884	C	53768	C	53410	C	53770	C
1489	IGS (ndhC, trnV-UAC)	LSC	53879	C	53526	C	53873	C	53879	C	53897	C	53781	A	53422	C	53785	C
1490	IGS (ndhC, trnV-UAC)	LSC	53899	G	53546	G	53893	G	53899	G	53917	G	53801	G	53442	G	53805	A
1491	IGS (ndhC, trnV-UAC)	LSC	53944	A	53591	A	53938	A	53944	A	53962	A	53846	A	53487	C	53850	A
1492	IGS (ndhC, trnV-UAC)	LSC	53966	T	53600	A	53947	A	53966	T	53971	A	53855	A	53509	T	53872	T
1493	IGS (ndhC, trnV-UAC)	LSC	54009	T	53643	T	53990	C	54009	T	54014	T	53898	T	53552	T	53915	T
1494	IGS (ndhC, trnV-UAC)	LSC	54023	A	53657	A	54004	A	54023	C	54028	A	53912	A	53566	A	53929	A
1495	IGS (ndhC, trnV-UAC)	LSC	54057	T	53691	T	54038	T	54057	T	54062	T	53946	T	53601	T	53963	C
1496	IGS (ndhC, trnV-UAC)	LSC	54077	T	53711	T	54058	T	54077	T	54082	T	53966	T	53621	T	53983	G
1497	IGS (ndhC, trnV-UAC)	LSC	54080	T	53714	T	54061	T	54080	T	54085	T	53969	G	53624	T	53986	T
1498	IGS (ndhC, trnV-UAC)	LSC	54088	T	53722	T	54069	T	54088	T	54093	T	53977	C	53632	T	53994	T
1499	IGS (ndhC, trnV-UAC)	LSC	54105	T	53739	G	54086	G	54105	T	54110	G	53994	G	53649	T	54011	T
1500	IGS (ndhC, trnV-UAC)	LSC	54153	T	53787	T	54134	T	54153	T	54158	T	54042	T	53697	A	54059	T
1501	IGS (ndhC, trnV-UAC)	LSC	54193	T	53827	T	54174	C	54193	T	54198	T	54082	C	53737	T	54099	T
1502	IGS (ndhC, trnV-UAC)	LSC	54200	C	53834	C	54181	C	54200	C	54205	T	54089	C	53744	C	54106	C
1503	IGS (ndhC, trnV-UAC)	LSC	54235	A	53869	C	54216	C	54235	C	54241	C	54124	C	53779	C	54141	C
1504	IGS (ndhC, trnV-UAC)	LSC	54241	C	53875	C	54222	C	54241	C	54247	C	54130	C	53785	A	54147	C
1505	IGS (ndhC, trnV-UAC)	LSC	54447	C	54081	C	54428	C	54447	C	54453	C	54335	C	53987	T	54171	C
1506	IGS (ndhC, trnV-UAC)	LSC	54461	C	54095	C	54442	C	54461	C	54467	C	54349	C	54001	T	54185	C
1507	IGS (ndhC, trnV-UAC)	LSC	54486	G	54120	C	54467	G	54486	G	54492	G	54374	G	54026	G	54210	G
1508	IGS (ndhC, trnV-UAC)	LSC	54518	T	54152	T	54499	G	54518	T	54524	T	54406	T	54058	T	54242	T
1509	IGS (ndhC, trnV-UAC)	LSC	54519	C	54153	C	54500	C	54519	C	54525	C	54407	C	54059	C	54243	A
1510	trnV-UAC-intron 1	LSC	54756	A	54398	A	54742	A	54756	C	54770	A	54650	A	54307	A	54488	A
1511	trnV-UAC-intron 1	LSC	54913	T	54557	T	54899	T	54913	T	54926	T	54805	T	54463	T	54646	A
1512	trnV-UAC-intron 1	LSC	54990	G	54634	G	54976	G	54990	G	55003	G	54882	G	54540	G	54723	A
1513	trnV-UAC-intron 1	LSC	55008	A	54652	A	54994	G	55008	A	55021	A	54900	A	54558	A	54741	A
1514	trnV-UAC-intron 1	LSC	55009	T	54653	T	54995	T	55009	T	55022	T	54901	T	54559	T	54742	C
1515	trnV-UAC-intron 1	LSC	55018	A	54662	G	55004	A	55018	G	55031	G	54910	G	54568	G	54751	G
1516	trnV-UAC-intron 1	LSC	55028	G	54672	G	55014	G	55028	G	55041	G	54920	C	54578	G	54761	G
1517	trnV-UAC-intron 1	LSC	55080	A	54724	C	55066	C	55080	A	55093	C	54972	C	54630	A	54813	A
1518	IGS (trnV-UAC, trnM-CAU)	LSC	55199	A	54843	A	55185	A	55199	A	55212	A	55091	G	54749	A	54933	A
1519	IGS (trnV-UAC, trnM-CAU)	LSC	55223	G	54867	G	55209	G	55223	G	55236	G	55115	G	54773	T	54957	G
1520	IGS (trnV-UAC, trnM-CAU)	LSC	55311	T	54955	T	55297	C	55311	T	55324	T	55196	T	54852	T	55045	T
1521	IGS (trnV-UAC, trnM-CAU)	LSC	55325	G	54969	G	55311	G	55325	G	55338	G	55210	G	54866	A	55060	G
1522	IGS (trnM-CAU, atpE)	LSC	55428	G	55072	G	55414	G	55428	G	55441	G	55313	G	54969	T	55163	T
1523	IGS (trnM-CAU, atpE)	LSC	55429	A	55073	A	55415	A	55429	A	55442	A	55314	A	54970	T	55164	T
1524	IGS (trnM-CAU, atpE)	LSC	55431	T	55075	T	55417	T	55431	T	55444	T	55316	T	54972	A	55166	A
1525	IGS (trnM-CAU, atpE)	LSC	55433	A	55077	A	55419	A	55433	A	55446	A	55318	A	54974	T	55168	T
1526	IGS (trnM-CAU, atpE)	LSC	55434	A	55078	A	55420	A	55434	A	55447	A	55319	A	54975	C	55169	C
1527	IGS (trnM-CAU, atpE)	LSC	55459	C	55103	C	55445	C	55459	C	55472	C	55351	C	55000	T	55194	C
1528	IGS (trnM-CAU, atpE)	LSC	55470	C	55114	A	55456	C	55470	C	55483	C	55362	C	55011	C	55205	C
1529	IGS (trnM-CAU, atpE)	LSC	55493	T	55137	G	55479	T	55493	T	55506	G	55385	T	55034	T	55228	T
1530	IGS (trnM-CAU, atpE)	LSC	55546	C	55190	C	55532	C	55546	C	55559	C	55438	T	55087	C	55281	C
1531	atpE	LSC	55610	C	55254	T	55596	C	55610	C	55623	C	55502	C	55151	C	55345	C
1532	atpE	LSC	55674	A	55318	A	55660	A	55674	A	55687	A	55566	A	55215	C	55409	A
1533	atpE	LSC	55734	G	55378	G	55720	G	55734	G	55747	G	55626	G	55275	A	55469	G
1534	atpE	LSC	55776	A	55420	A	55762	G	55776	A	55789	A	55668	A	55317	A	55511	A
1535	atpE	LSC	55863	A	55507	A	55849	A	55863	A	55876	A	55755	A	55404	T	55598	A
1536	atpE	LSC	55917	C	55561	A	55903	A	55917	C	55930	A	55809	A	55458	A	55652	A
1537	atpE	LSC	55926	G	55570	G	55912	G	55926	A	55939	G	55818	G	55467	G	55661	G
1538	atpB	LSC	56123	T	55767	T	56109	T	56123	T	56136	T	56015	T	55664	T	55858	A
1539	atpB	LSC	56129	T	55773	T	56115	T	56129	T	56142	T	56021	T	55670	T	55864	G
1540	atpB	LSC	56150	T	55794	T	56136	C	56150	T	56163	T	56042	T	55691	T	55885	T
1541	atpB	LSC	56183	G	55827	G	56169	G	56183	G	56196	G	56075	G	55724	G	55918	A
1542	atpB	LSC	56351	C	55995	C	56337	C	56351	C	56364	C	56243	T	55892	C	56086	C
1543	atpB	LSC	56384	A	56028	A	56370	A	56384	A	56397	A	56276	A	55925	A	56119	C
1544	atpB	LSC	56396	T	56040	T	56382	T	56396	T	56409	T	56288	T	55937	C	56131	T
1545	atpB	LSC	56426	T	56070	T	56412	T	56426	T	56439	T	56318	T	55967	G	56161	T
1546	atpB	LSC	56516	C	56160	A	56502	A	56516	A	56529	A	56408	A	56057	A	56251	A
1547	atpB	LSC	56525	A	56169	A	56511	A	56525	A	56538	A	56417	A	56066	C	56260	A
1548	atpB	LSC	56624	G	56268	G	56610	G	56624	G	56637	G	56516	A	56165	G	56359	G
1549	atpB	LSC	56714	C	56358	T	56700	C	56714	C	56727	T	56606	C	56255	C	56449	C
1550	atpB	LSC	56743	G	56387	T	56729	T	56743	T	56756	T	56635	T	56284	T	56478	T
1551	atpB	LSC	56789	T	56433	T	56775	T	56789	T	56802	T	56681	T	56330	T	56524	G
1552	atpB	LSC	56891	T	56535	T	56877	T	56891	T	56904	T	56783	T	56432	T	56626	C
1553	atpB	LSC	56903	T	56547	C	56889	T	56903	T	56916	T	56795	T	56444	T	56638	T
1554	atpB	LSC	56924	G	56568	G	56910	A	56924	G	56937	G	56816	G	56465	G	56659	G
1555	atpB	LSC	56948	T	56592	T	56934	T	56948	T	56961	T	56840	C	56489	T	56683	T
1556	atpB	LSC	57023	T	56667	T	57009	T	57023	T	57036	T	56915	T	56564	C	56758	T
1557	atpB	LSC	57044	A	56688	A	57030	A	57044	A	57057	A	56936	A	56585	C	56779	A
1558	atpB	LSC	57053	T	56697	T	57039	T	57053	T	57066	T	56945	T	56594	T	56788	A
1559	atpB	LSC	57077	C	56721	C	57063	C	57077	C	57090	C	56969	T	56618	C	56812	C
1560	atpB	LSC	57125	A	56769	A	57111	A	57125	A	57138	G	57017	A	56666	A	56860	A
1561	atpB	LSC	57158	C	56802	C	57144	C	57158	C	57171	C	57050	C	56699	C	56893	T
1562	atpB	LSC	57170	C	56814	C	57156	C	57170	C	57183	C	57062	A	56711	C	56905	C
1563	atpB	LSC	57221	T	56865	T	57207	T	57221	C	57234	T	57113	T	56762	T	56956	T
1564	atpB	LSC	57336	T	56980	G	57322	T	57336	T	57349	T	57228	T	56877	T	57071	T
1565	atpB	LSC	57383	A	57027	A	57369	A	57383	G	57396	A	57275	A	56924	A	57118	A
1566	atpB	LSC	57455	A	57099	A	57441	G	57455	A	57468	A	57347	G	56996	A	57190	A
1567	IGS (atpB, rbcL)	LSC	57558	G	57202	G	57544	G	57558	G	57571	G	57450	G	57099	G	57293	A
1568	IGS (atpB, rbcL)	LSC	57573	T	57217	T	57559	T	57573	T	57586	T	57465	T	57114	T	57308	C
1569	IGS (atpB, rbcL)	LSC	57579	C	57223	A	57565	A	57579	C	57592	A	57471	A	57120	A	57314	A
1570	IGS (atpB, rbcL)	LSC	57587	T	57231	T	57573	T	57587	T	57600	T	57479	T	57128	T	57322	G
1571	IGS (atpB, rbcL)	LSC	57593	T	57237	T	57579	T	57593	T	57606	T	57485	T	57134	G	57328	T
1572	IGS (atpB, rbcL)	LSC	57652	A	57298	C	57638	C	57652	A	57665	C	57544	C	57193	A	57387	A
1573	IGS (atpB, rbcL)	LSC	57660	A	57306	A	57646	A	57660	A	57673	A	57552	G	57201	A	57395	A
1574	IGS (atpB, rbcL)	LSC	57663	T	57309	T	57649	T	57663	T	57676	T	57555	T	57204	T	57398	C
1575	IGS (atpB, rbcL)	LSC	57742	C	57388	C	57728	C	57742	C	57755	C	57634	C	57283	T	57477	C
1576	IGS (atpB, rbcL)	LSC	57783	T	57429	T	57769	T	57783	T	57796	T	57675	T	57324	T	57518	G
1577	IGS (atpB, rbcL)	LSC	57812	G	57458	G	57798	G	57812	G	57825	G	57704	A	57353	G	57547	G
1578	IGS (atpB, rbcL)	LSC	57817	T	57463	T	57803	C	57817	T	57830	T	57709	T	57358	T	57552	T
1579	IGS (atpB, rbcL)	LSC	57818	T	57464	G	57804	G	57818	T	57831	G	57710	G	57359	T	57553	T
1580	IGS (atpB, rbcL)	LSC	57823	C	57469	C	57809	C	57823	C	57836	C	57715	C	57364	C	57558	G
1581	IGS (atpB, rbcL)	LSC	57852	A	57498	G	57838	G	57852	G	57865	G	57744	G	57393	G	57587	T
1582	IGS (atpB, rbcL)	LSC	57887	T	57533	T	57873	T	57887	T	57900	T	57779	T	57428	T	57622	G
1583	IGS (atpB, rbcL)	LSC	57898	C	57544	T	57884	T	57898	T	57911	T	57790	T	57439	T	57633	T
1584	IGS (atpB, rbcL)	LSC	57926	A	57572	G	57912	A	57926	A	57939	A	57818	A	57467	A	57661	A
1585	IGS (atpB, rbcL)	LSC	57997	G	57644	G	57980	G	57997	G	58008	G	57883	A	57534	A	57728	A
1586	IGS (atpB, rbcL)	LSC	57998	G	57645	G	57981	G	57998	G	58009	G	57884	A	57535	G	57729	G
1587	IGS (atpB, rbcL)	LSC	58019	G	57669	G	58002	G	58019	G	58030	G	57905	G	57556	A	57750	G
1588	IGS (atpB, rbcL)	LSC	58025	A	57675	A	58008	A	58025	A	58036	A	57911	C	57562	G	57756	G
1589	IGS (atpB, rbcL)	LSC	58130	A	57780	C	58113	A	58130	A	58141	A	58016	A	57667	A	57861	A
1590	IGS (atpB, rbcL)	LSC	58134	G	57784	G	58117	G	58134	G	58145	G	58020	G	57671	A	57865	G
1591	IGS (atpB, rbcL)	LSC	58137	A	57787	G	58120	A	58137	A	58148	A	58023	A	57674	A	57868	A
1592	IGS (atpB, rbcL)	LSC	58166	T	57816	T	58149	T	58166	T	58177	T	58052	T	57703	G	57897	T
1593	IGS (atpB, rbcL)	LSC	58177	T	57827	T	58160	T	58177	T	58188	T	58063	T	57714	C	57908	T
1594	IGS (atpB, rbcL)	LSC	58183	A	57833	A	58166	A	58183	A	58194	A	58069	A	57720	A	57914	C
1595	rbcL	LSC	58260	G	57910	A	58243	G	58260	G	58271	G	58146	G	57797	G	57991	G
1596	rbcL	LSC	58353	G	58003	A	58336	G	58353	G	58364	G	58239	G	57890	G	58084	G
1597	rbcL	LSC	58410	G	58060	G	58393	A	58410	G	58421	G	58296	G	57947	G	58141	G
1598	rbcL	LSC	58513	G	58163	G	58496	G	58513	C	58524	G	58399	C	58050	C	58244	G
1599	rbcL	LSC	58526	G	58176	A	58509	G	58526	G	58537	A	58412	G	58063	G	58257	A
1600	rbcL	LSC	58635	C	58285	C	58618	C	58635	C	58646	C	58521	C	58172	C	58366	G
1601	rbcL	LSC	58797	C	58447	T	58780	C	58797	C	58808	C	58683	C	58334	C	58528	C
1602	rbcL	LSC	58806	A	58456	G	58789	A	58806	A	58817	A	58692	A	58343	A	58537	G
1603	rbcL	LSC	58908	C	58558	C	58891	C	58908	C	58919	C	58794	C	58445	C	58639	A
1604	rbcL	LSC	58914	A	58564	C	58897	A	58914	A	58925	A	58800	A	58451	A	58645	C
1605	rbcL	LSC	58915	C	58565	A	58898	A	58915	C	58926	A	58801	A	58452	A	58646	C
1606	rbcL	LSC	58917	T	58567	T	58900	T	58917	T	58928	T	58803	T	58454	C	58648	T
1607	rbcL	LSC	58919	A	58569	T	58902	A	58919	A	58930	T	58805	A	58456	A	58650	A
1608	rbcL	LSC	58924	G	58574	T	58907	T	58924	G	58935	T	58810	T	58461	T	58655	G
1609	rbcL	LSC	58926	A	58576	A	58909	C	58926	A	58937	A	58812	C	58463	A	58657	A
1610	rbcL	LSC	58932	C	58582	C	58915	C	58932	C	58943	C	58818	C	58469	T	58663	C
1611	rbcL	LSC	58989	A	58639	A	58972	C	58989	A	59000	A	58875	A	58526	A	58720	A
1612	rbcL	LSC	59005	A	58655	A	58988	G	59005	A	59016	A	58891	A	58542	A	58736	G
1613	rbcL	LSC	59078	C	58728	C	59061	C	59078	C	59089	C	58964	C	58615	C	58809	G
1614	rbcL	LSC	59169	A	58819	A	59152	G	59169	A	59180	A	59055	A	58706	G	58900	A
1615	rbcL	LSC	59193	G	58843	G	59176	G	59193	G	59204	G	59079	A	58730	G	58924	G
1616	rbcL	LSC	59224	T	58874	G	59207	G	59224	T	59235	G	59110	G	58761	G	58955	T
1617	rbcL	LSC	59262	A	58912	A	59245	T	59262	A	59273	A	59148	C	58799	C	58993	A
1618	rbcL	LSC	59331	T	58981	C	59314	T	59331	T	59342	T	59217	T	58868	T	59062	T
1619	rbcL	LSC	59588	C	59238	G	59571	G	59588	C	59599	G	59474	G	59125	G	59319	G
1620	rbcL	LSC	59591	A	59241	A	59574	A	59591	A	59602	A	59477	C	59128	A	59322	A
1621	IGS (rbcL, accD)	LSC	59675	C	59325	G	59658	G	59675	G	59686	G	59561	G	59212	G	59406	G
1622	IGS (rbcL, accD)	LSC	59691	C	59341	C	59674	C	59691	C	59702	C	59577	C	59228	C	59422	T
1623	IGS (rbcL, accD)	LSC	59755	T	59405	T	59738	T	59755	T	59766	T	59641	T	59292	C	59486	T
1624	IGS (rbcL, accD)	LSC	59804	T	59454	G	59787	G	59804	G	59815	G	59690	G	59341	G	59535	T
1625	IGS (rbcL, accD)	LSC	59805	C	59455	A	59788	A	59805	A	59816	A	59691	A	59342	A	59536	C
1626	IGS (rbcL, accD)	LSC	59840	A	59490	A	59823	A	59840	A	59851	A	59726	A	59377	A	59571	G
1627	IGS (rbcL, accD)	LSC	59846	C	59501	C	59834	C	59846	C	59862	C	59737	T	59383	C	59582	A
1628	IGS (rbcL, accD)	LSC	59862	G	59517	T	59850	T	59862	T	59878	T	59753	T	59399	T	59598	T
1629	IGS (rbcL, accD)	LSC	59874	C	59529	G	59862	C	59874	C	59890	G	59765	C	59411	C	59610	C
1630	IGS (rbcL, accD)	LSC	59926	G	59581	G	59914	G	59926	G	59942	G	59817	G	59463	A	59662	G
1631	IGS (rbcL, accD)	LSC	59953	A	59608	A	59941	A	59953	A	59969	A	59844	A	59490	C	59689	A
1632	IGS (rbcL, accD)	LSC	59992	G	59647	G	59980	G	59992	A	60008	G	59883	G	59529	G	59728	G
1633	IGS (rbcL, accD)	LSC	60045	G	59700	G	60033	G	60045	G	60061	G	59936	G	59580	A	59781	G
1634	IGS (rbcL, accD)	LSC	60049	A	59704	A	60037	A	60049	T	60065	A	59940	A	59584	A	59785	A
1635	IGS (rbcL, accD)	LSC	60050	A	59705	A	60038	A	60050	C	60066	A	59941	A	59585	A	59786	A
1636	IGS (rbcL, accD)	LSC	60093	A	59747	G	60081	G	60093	G	60109	G	59983	G	59628	G	59809	G
1637	IGS (rbcL, accD)	LSC	60107	T	59761	T	60095	G	60107	T	60123	T	59997	G	59642	T	59823	T
1638	IGS (rbcL, accD)	LSC	60245	G	59905	G	60233	G	60245	G	60261	G	60135	G	59780	T	59961	G
1639	accD	LSC	60314	G	59974	G	60302	G	60314	G	60330	G	60204	G	59849	G	60030	A
1640	accD	LSC	60336	C	59996	C	60324	C	60336	C	60352	C	60226	C	59871	T	60052	C
1641	accD	LSC	60366	G	60026	G	60354	G	60366	G	60382	G	60256	A	59901	G	60082	G
1642	accD	LSC	60437	T	60097	T	60425	T	60437	T	60453	T	60327	C	59972	T	60153	T
1643	accD	LSC	60467	A	60127	A	60455	A	60467	C	60483	A	60357	A	60002	A	60183	A
1644	accD	LSC	60550	A	60210	C	60538	C	60550	A	60566	C	60440	C	60085	C	60266	C
1645	accD	LSC	60597	G	60257	A	60585	A	60597	A	60613	A	60487	A	60132	A	60313	A
1646	accD	LSC	60619	A	60279	A	60607	G	60619	A	60635	A	60509	A	60154	A	60335	A
1647	accD	LSC	60639	G	60299	G	60627	C	60639	G	60655	G	60529	C	60174	G	60355	G
1648	accD	LSC	60684	C	60344	C	60672	C	60684	C	60700	C	60574	C	60219	C	60400	A
1649	accD	LSC	60711	G	60371	G	60699	G	60711	A	60727	G	60601	G	60246	G	60427	G
1650	accD	LSC	60717	A	60377	A	60705	A	60717	A	60733	A	60607	G	60252	A	60433	A
1651	accD	LSC	60732	C	60392	C	60720	C	60732	C	60748	C	60622	C	60267	T	60448	C
1652	accD	LSC	60758	T	60418	T	60746	T	60758	T	60774	T	60642	T	60293	A	60474	T
1653	accD	LSC	60779	T	60439	C	60767	C	60779	T	60795	C	60663	C	60314	C	60495	C
1654	accD	LSC	60808	A	60468	G	60796	G	60808	G	60824	G	60692	G	60343	G	60524	G
1655	accD	LSC	60827	T	60487	T	60815	T	60827	T	60843	T	60711	T	60362	A	60543	T
1656	accD	LSC	60904	A	60564	A	60892	A	60904	A	60920	A	60788	C	60439	A	60620	A
1657	accD	LSC	60956	T	60616	T	60944	T	60956	T	60972	T	60840	G	60491	T	60672	T
1658	accD	LSC	61067	A	60727	A	61055	A	61067	A	61083	A	60951	A	60602	G	60783	A
1659	accD	LSC	61114	T	60774	T	61102	T	61114	T	61130	T	60998	T	60649	T	60830	C
1660	accD	LSC	61134	G	60794	G	61122	G	61134	G	61150	G	61018	A	60669	G	60850	C
1661	accD	LSC	61157	C	60817	C	61145	T	61157	C	61173	C	61041	C	60692	C	60873	C
1662	accD	LSC	61163	G	60823	G	61151	G	61163	G	61179	G	61047	G	60698	G	60879	A
1663	accD	LSC	61187	G	60847	A	61175	G	61187	G	61203	A	61071	G	60722	G	60903	G
1664	accD	LSC	61248	G	60908	G	61236	G	61248	G	61264	G	61132	A	60783	G	60964	G
1665	accD	LSC	61269	C	60929	C	61257	C	61269	C	61285	C	61153	C	60804	C	60985	T
1666	accD	LSC	61352	T	61012	T	61340	T	61352	T	61368	T	61236	T	60887	T	61068	G
1667	accD	LSC	61403	A	61063	A	61391	G	61403	A	61419	A	61287	A	60938	A	61119	A
1668	accD	LSC	61532	T	61192	T	61520	T	61532	T	61548	T	61416	T	61067	T	61248	G
1669	accD	LSC	61613	G	61273	A	61601	G	61613	G	61629	G	61497	G	61148	G	61329	G
1670	accD	LSC	61622	A	61282	A	61610	G	61622	A	61638	A	61506	A	61157	A	61338	A
1671	accD	LSC	61787	T	61447	G	61775	T	61787	T	61803	T	61671	T	61322	T	61503	A
1672	IGS (accD, psaI)	LSC	61798	G	61458	G	61786	A	61798	G	61814	G	61682	G	61333	G	61514	G
1673	IGS (accD, psaI)	LSC	61811	T	61471	T	61799	T	61811	T	61827	T	61695	T	61346	T	61527	G
1674	IGS (accD, psaI)	LSC	61865	A	61525	A	61853	A	61865	A	61881	A	61749	A	61400	A	61581	G
1675	IGS (accD, psaI)	LSC	61882	G	61542	A	61870	G	61882	G	61898	G	61765	G	61417	A	61598	G
1676	IGS (accD, psaI)	LSC	61885	G	61545	G	61873	G	61885	G	61901	G	61768	A	61420	G	61601	G
1677	IGS (accD, psaI)	LSC	61889	A	61549	A	61877	A	61889	A	61905	A	61772	A	61424	A	61605	C
1678	IGS (accD, psaI)	LSC	61907	G	61567	G	61895	G	61907	G	61923	G	61790	G	61442	G	61623	A
1679	IGS (accD, psaI)	LSC	61914	T	61574	T	61902	G	61914	T	61930	T	61797	T	61449	T	61630	T
1680	IGS (accD, psaI)	LSC	61919	A	61579	A	61907	A	61919	A	61935	A	61802	A	61454	G	61635	A
1681	IGS (accD, psaI)	LSC	61951	C	61616	T	61942	C	61951	C	61972	T	61837	C	61468	C	61670	C
1682	IGS (accD, psaI)	LSC	61961	A	61626	A	61952	T	61961	A	61982	T	61847	A	61478	T	61680	A
1683	IGS (accD, psaI)	LSC	61962	C	61627	C	61953	A	61962	C	61983	A	61848	C	61479	A	61681	C
1684	IGS (accD, psaI)	LSC	61983	C	61648	T	61974	C	61983	C	62004	C	61869	C	61500	C	61708	C
1685	IGS (accD, psaI)	LSC	61988	A	61653	C	61979	A	61988	A	62009	A	61874	A	61505	A	61713	A
1686	IGS (accD, psaI)	LSC	62014	G	61679	G	62005	T	62014	G	62035	G	61900	G	61531	T	61739	G
1687	IGS (accD, psaI)	LSC	62021	G	61686	G	62012	A	62021	G	62042	G	61907	A	61538	G	61746	G
1688	IGS (accD, psaI)	LSC	62036	T	61701	A	62027	A	62036	C	62057	A	61922	A	61553	A	61761	A
1689	IGS (accD, psaI)	LSC	62130	G	61795	G	62121	G	62130	G	62151	G	62016	G	61642	G	61855	C
1690	IGS (accD, psaI)	LSC	62133	C	61798	A	62124	A	62133	C	62154	A	62019	A	61645	A	61858	A
1691	IGS (accD, psaI)	LSC	62149	C	61814	C	62140	C	62149	C	62170	C	62035	T	61661	C	61874	C
1692	IGS (accD, psaI)	LSC	62161	G	61826	G	62152	G	62161	G	62182	G	62047	C	61673	G	61886	G
1693	IGS (accD, psaI)	LSC	62187	A	61852	T	62178	G	62187	A	62208	G	62073	G	61699	G	61912	G
1694	IGS (accD, psaI)	LSC	62191	G	61856	G	62182	G	62191	G	62212	G	62077	G	61703	G	61916	A
1695	IGS (accD, psaI)	LSC	62206	T	61871	T	62197	T	62206	T	62227	T	62092	T	61718	C	61931	T
1696	IGS (accD, psaI)	LSC	62237	C	61902	C	62228	C	62237	T	62258	C	62117	C	61742	C	61955	C
1697	IGS (accD, psaI)	LSC	62258	A	61923	A	62249	A	62258	A	62279	A	62138	A	61763	C	61976	A
1698	IGS (accD, psaI)	LSC	62262	T	61927	T	62253	T	62262	T	62283	T	62142	T	61767	T	61980	G
1699	IGS (accD, psaI)	LSC	62289	C	61954	C	62280	C	62289	C	62310	C	62169	T	61794	C	62007	C
1700	IGS (accD, psaI)	LSC	62333	C	62003	C	62329	T	62333	C	62359	C	62218	C	61843	C	62056	C
1701	IGS (accD, psaI)	LSC	62383	T	62053	T	62379	T	62383	T	62409	T	62268	T	61893	T	62106	G
1702	IGS (accD, psaI)	LSC	62397	G	62067	T	62393	T	62397	G	62423	T	62282	T	61907	T	62120	T
1703	IGS (accD, psaI)	LSC	62409	C	62079	C	62405	C	62409	C	62435	C	62294	C	61919	C	62132	A
1704	IGS (accD, psaI)	LSC	62415	T	62085	T	62411	T	62415	T	62441	A	62300	T	61925	T	62138	T
1705	IGS (accD, psaI)	LSC	62471	C	62141	C	62467	C	62471	C	62497	C	62356	C	61981	C	62194	T
1706	IGS (psaI, ycf4)	LSC	62622	A	62291	A	62618	A	62622	A	62646	A	62509	G	62133	A	62345	A
1707	IGS (psaI, ycf4)	LSC	62625	T	62294	T	62621	C	62625	T	62649	T	62512	T	62136	T	62348	T
1708	IGS (psaI, ycf4)	LSC	62644	G	62313	G	62640	G	62644	G	62668	G	62531	A	62155	G	62367	G
1709	IGS (psaI, ycf4)	LSC	62712	C	62381	C	62708	C	62712	C	62736	C	62599	C	62223	C	62435	A
1710	IGS (psaI, ycf4)	LSC	62733	T	62402	T	62729	T	62733	T	62757	T	62620	T	62244	A	62456	T
1711	IGS (psaI, ycf4)	LSC	62737	T	62406	T	62733	T	62737	T	62761	T	62624	T	62248	T	62460	G
1712	IGS (psaI, ycf4)	LSC	62748	C	62417	C	62744	C	62748	C	62772	C	62635	C	62259	C	62471	A
1713	IGS (psaI, ycf4)	LSC	62772	A	62441	A	62768	A	62772	G	62796	A	62659	A	62283	A	62495	A
1714	IGS (psaI, ycf4)	LSC	62773	G	62442	G	62769	G	62773	G	62797	G	62660	G	62284	G	62496	A
1715	IGS (psaI, ycf4)	LSC	62774	G	62443	G	62770	G	62774	G	62798	G	62661	G	62285	G	62497	A
1716	IGS (psaI, ycf4)	LSC	62820	T	62489	T	62824	T	62820	T	62844	T	62707	T	62331	T	62543	G
1717	IGS (psaI, ycf4)	LSC	62865	C	62534	C	62869	C	62865	C	62889	C	62752	C	62376	T	62588	C
1718	IGS (psaI, ycf4)	LSC	62890	T	62559	T	62894	T	62890	T	62914	G	62777	T	62401	T	62613	T
1719	IGS (psaI, ycf4)	LSC	62904	T	62573	T	62908	T	62904	T	62928	T	62791	T	62415	T	62627	G
1720	ycf4	LSC	63060	C	62729	A	63064	A	63060	C	63084	A	62947	A	62571	A	62783	A
1721	ycf4	LSC	63080	C	62749	C	63084	T	63080	C	63104	C	62967	T	62591	C	62803	C
1722	ycf4	LSC	63086	A	62755	C	63090	C	63086	A	63110	C	62973	C	62597	C	62809	C
1723	ycf4	LSC	63154	C	62823	C	63158	C	63154	C	63178	C	63041	C	62665	C	62877	T
1724	ycf4	LSC	63178	T	62847	T	63182	T	63178	T	63202	T	63065	T	62689	T	62901	C
1725	ycf4	LSC	63221	A	62890	A	63225	A	63221	A	63245	A	63108	T	62732	A	62944	A
1726	ycf4	LSC	63267	A	62936	G	63271	G	63267	G	63291	G	63154	A	62778	G	62990	G
1727	ycf4	LSC	63284	T	62953	T	63288	T	63284	T	63308	T	63171	C	62795	T	63007	T
1728	ycf4	LSC	63311	T	62980	G	63315	G	63311	T	63335	G	63198	G	62822	G	63034	G
1729	ycf4	LSC	63353	C	63022	C	63357	C	63353	C	63377	C	63240	C	62864	C	63076	T
1730	ycf4	LSC	63366	C	63035	C	63370	T	63366	C	63390	C	63253	C	62877	C	63089	C
1731	ycf4	LSC	63524	A	63193	A	63528	A	63524	A	63548	G	63411	A	63035	A	63247	A
1732	IGS (ycf4, cemA)	LSC	63576	T	63245	T	63579	T	63576	T	63600	T	63463	T	63087	A	63297	T
1733	IGS (ycf4, cemA)	LSC	63604	C	63273	C	63607	C	63604	C	63628	C	63492	A	63115	C	63325	C
1734	IGS (ycf4, cemA)	LSC	63622	T	63291	C	63625	T	63622	T	63646	T	63509	T	63133	T	63343	T
1735	IGS (ycf4, cemA)	LSC	63692	C	63361	C	63695	T	63692	C	63716	C	63567	T	63203	C	63413	T
1736	IGS (ycf4, cemA)	LSC	63699	G	63368	G	63702	G	63699	G	63723	G	63574	G	63204	T	63420	G
1737	IGS (ycf4, cemA)	LSC	63700	C	63369	C	63703	C	63700	C	63724	C	63575	C	63205	T	63421	C
1738	IGS (ycf4, cemA)	LSC	63702	T	63371	T	63705	C	63702	T	63726	T	63577	T	63207	C	63423	T
1739	IGS (ycf4, cemA)	LSC	63709	G	63378	G	63712	G	63709	G	63733	G	63584	G	63214	G	63430	A
1740	IGS (ycf4, cemA)	LSC	63716	G	63385	G	63719	G	63716	G	63740	G	63591	G	63221	G	63437	A
1741	IGS (ycf4, cemA)	LSC	63725	A	63394	A	63728	G	63725	A	63749	A	63600	A	63230	G	63446	A
1742	IGS (ycf4, cemA)	LSC	63742	C	63411	C	63745	C	63742	C	63766	C	63617	C	63247	C	63463	T
1743	IGS (ycf4, cemA)	LSC	63798	C	63467	C	63801	C	63798	C	63822	T	63673	C	63303	C	63519	C
1744	IGS (ycf4, cemA)	LSC	63826	A	63495	A	63829	A	63826	A	63850	A	63701	A	63331	A	63547	G
1745	IGS (ycf4, cemA)	LSC	63852	C	63521	C	63855	C	63852	C	63876	C	63727	T	63357	C	63573	C
1746	IGS (ycf4, cemA)	LSC	63858	A	63527	A	63861	A	63858	A	63882	A	63733	A	63363	A	63579	C
1747	IGS (ycf4, cemA)	LSC	63886	T	63555	T	63889	T	63886	T	63910	T	63761	T	63391	G	63607	T
1748	IGS (ycf4, cemA)	LSC	63907	G	63576	G	63910	G	63907	G	63931	G	63782	G	63412	G	63628	A
1749	IGS (ycf4, cemA)	LSC	63930	T	63600	G	63934	G	63930	G	63955	G	63806	G	63436	G	63652	G
1750	IGS (ycf4, cemA)	LSC	63932	G	63602	G	63936	G	63932	G	63957	G	63808	G	63438	G	63654	A
1751	IGS (ycf4, cemA)	LSC	64122	G	63792	G	64126	G	64122	G	64147	G	63998	G	63628	G	63844	C
1752	cemA	LSC	64198	T	63871	T	64199	T	64198	T	64222	T	64073	T	63706	G	63920	T
1753	cemA	LSC	64244	C	63917	C	64245	C	64244	C	64268	C	64119	C	63752	C	63966	A
1754	cemA	LSC	64262	C	63935	C	64263	C	64262	C	64286	C	64137	C	63770	C	63984	A
1755	cemA	LSC	64504	C	64177	C	64505	C	64504	C	64528	C	64379	T	64012	C	64226	C
1756	cemA	LSC	64529	C	64202	C	64530	C	64529	C	64553	C	64404	C	64037	C	64251	T
1757	cemA	LSC	64538	G	64211	G	64539	G	64538	G	64562	G	64413	G	64046	G	64260	A
1758	cemA	LSC	64576	C	64249	T	64577	T	64576	C	64600	T	64451	T	64084	C	64298	C
1759	cemA	LSC	64606	T	64279	T	64607	T	64606	T	64630	T	64481	T	64114	C	64328	T
1760	IGS (cemA, petA)	LSC	64867	C	64540	C	64868	C	64867	C	64891	C	64742	C	64375	C	64607	T
1761	IGS (cemA, petA)	LSC	64881	G	64554	A	64882	G	64881	G	64905	A	64756	G	64389	G	64621	G
1762	IGS (cemA, petA)	LSC	64889	G	64562	G	64890	G	64889	G	64913	G	64764	A	64397	G	64629	G
1763	IGS (cemA, petA)	LSC	64904	G	64577	G	64905	C	64904	G	64928	G	64779	G	64412	G	64644	G
1764	IGS (cemA, petA)	LSC	64924	G	64597	G	64925	A	64924	G	64948	G	64799	G	64432	G	64664	G
1765	IGS (cemA, petA)	LSC	64943	A	64616	A	64944	A	64943	A	64967	A	64818	A	64451	A	64683	G
1766	IGS (cemA, petA)	LSC	65003	A	64663	A	65005	C	65003	A	65014	A	64879	A	64512	A	64744	A
1767	petA	LSC	65210	G	64870	G	65212	G	65210	G	65221	G	65086	G	64719	G	64951	A
1768	petA	LSC	65213	T	64873	T	65215	T	65213	T	65224	C	65089	T	64722	T	64954	T
1769	petA	LSC	65288	T	64948	C	65290	C	65288	T	65299	C	65164	C	64797	T	65029	T
1770	petA	LSC	65363	A	65023	A	65365	A	65363	A	65374	A	65239	A	64872	G	65104	A
1771	petA	LSC	65378	C	65038	A	65380	A	65378	C	65389	A	65254	A	64887	C	65119	C
1772	petA	LSC	65420	C	65080	C	65422	C	65420	C	65431	T	65296	C	64929	C	65161	C
1773	petA	LSC	65537	T	65197	T	65539	C	65537	T	65548	T	65413	T	65046	C	65278	T
1774	petA	LSC	65606	T	65266	T	65608	T	65606	T	65617	T	65482	T	65115	T	65347	G
1775	petA	LSC	65726	A	65386	A	65728	A	65726	A	65737	A	65602	A	65235	G	65467	A
1776	petA	LSC	65758	C	65418	C	65760	C	65758	C	65769	C	65634	C	65267	C	65499	T
1777	petA	LSC	65759	G	65419	G	65761	G	65759	G	65770	G	65635	A	65268	G	65500	G
1778	petA	LSC	65822	A	65482	A	65824	A	65822	A	65833	G	65698	A	65331	A	65563	A
1779	petA	LSC	65844	T	65504	C	65846	C	65844	T	65855	C	65720	C	65353	T	65585	T
1780	petA	LSC	65921	A	65581	A	65923	A	65921	A	65932	A	65797	A	65430	G	65662	A
1781	IGS (petA, psbJ)	LSC	66044	C	65704	C	66046	C	66044	C	66055	C	65920	C	65553	A	65785	C
1782	IGS (petA, psbJ)	LSC	66045	A	65705	A	66047	A	66045	A	66056	A	65921	A	65554	G	65786	A
1783	IGS (petA, psbJ)	LSC	66063	G	65723	G	66065	G	66063	G	66074	G	65939	G	65572	G	65804	T
1784	IGS (petA, psbJ)	LSC	66072	T	65732	T	66074	C	66072	T	66083	T	65948	T	65581	T	65813	T
1785	IGS (petA, psbJ)	LSC	66082	T	65742	T	66084	G	66082	T	66093	T	65958	G	65591	T	65823	T
1786	IGS (petA, psbJ)	LSC	66086	G	65746	G	66088	G	66086	G	66097	G	65962	G	65595	A	65827	G
1787	IGS (petA, psbJ)	LSC	66141	C	65807	C	66149	C	66141	C	66158	C	66023	T	65656	C	65888	C
1788	IGS (petA, psbJ)	LSC	66143	G	65809	G	66151	G	66143	G	66160	G	66025	A	65658	G	65890	G
1789	IGS (petA, psbJ)	LSC	66152	T	65818	T	66160	T	66152	T	66169	T	66034	T	65667	T	65899	C
1790	IGS (petA, psbJ)	LSC	66169	C	65835	C	66177	T	66169	C	66186	C	66051	T	65684	C	65916	C
1791	IGS (petA, psbJ)	LSC	66177	G	65843	G	66185	G	66177	G	66194	G	66059	G	65692	G	65924	C
1792	IGS (petA, psbJ)	LSC	66193	A	65859	A	66201	G	66193	A	66210	A	66075	A	65708	A	65940	A
1793	IGS (petA, psbJ)	LSC	66224	T	65890	T	66231	T	66224	T	66240	T	66109	T	65738	T	65970	G
1794	IGS (petA, psbJ)	LSC	66242	G	65908	G	66249	G	66242	G	66258	G	66127	G	65756	G	65988	A
1795	IGS (petA, psbJ)	LSC	66272	C	65938	C	66279	C	66272	C	66288	C	66157	T	65786	C	66018	C
1796	IGS (petA, psbJ)	LSC	66317	A	65975	C	66324	C	66317	A	66325	C	66194	C	65823	A	66055	A
1797	IGS (petA, psbJ)	LSC	66343	T	66001	G	66350	G	66343	T	66351	G	66220	G	65849	G	66081	G
1798	IGS (petA, psbJ)	LSC	66366	G	66024	G	66373	G	66366	G	66374	T	66243	G	65872	G	66104	G
1799	IGS (petA, psbJ)	LSC	66406	C	66064	C	66413	C	66406	G	66414	C	66283	C	65912	C	66144	C
1800	IGS (petA, psbJ)	LSC	66453	T	66111	T	66460	T	66453	T	66461	T	66330	T	65959	C	66191	T
1801	IGS (petA, psbJ)	LSC	66479	T	66137	T	66486	T	66479	T	66487	T	66356	T	65985	T	66217	C
1802	IGS (petA, psbJ)	LSC	66510	C	66168	C	66517	C	66510	C	66518	C	66387	G	66016	C	66248	C
1803	IGS (petA, psbJ)	LSC	66517	C	66175	C	66524	A	66517	C	66525	C	66394	C	66023	C	66255	C
1804	IGS (petA, psbJ)	LSC	66600	G	66254	G	66602	G	66600	G	66603	G	66474	A	66103	G	66335	G
1805	IGS (petA, psbJ)	LSC	66679	A	66333	A	66681	A	66679	A	66682	A	66553	A	66182	A	66414	C
1806	IGS (petA, psbJ)	LSC	66691	G	66345	G	66693	G	66691	G	66694	G	66565	G	66194	G	66426	A
1807	IGS (petA, psbJ)	LSC	66693	A	66347	A	66695	A	66693	A	66696	A	66567	A	66196	A	66428	G
1808	IGS (petA, psbJ)	LSC	66925	A	66580	A	66927	A	66925	A	66928	A	66799	A	66428	A	66452	G
1809	IGS (petA, psbJ)	LSC	66930	A	66585	A	66932	A	66930	A	66933	A	66804	A	66433	A	66457	C
1810	IGS (petA, psbJ)	LSC	66933	G	66588	A	66935	A	66933	G	66936	A	66807	A	66436	G	66460	G
1811	IGS (petA, psbJ)	LSC	66949	T	66604	T	66951	T	66949	T	66952	T	66823	T	66452	G	66476	T
1812	IGS (petA, psbJ)	LSC	66956	G	66611	G	66958	G	66956	G	66959	G	66830	G	66459	G	66483	A
1813	IGS (petA, psbJ)	LSC	66989	A	66644	A	66991	A	66989	G	66992	A	66863	A	66492	A	66516	A
1814	IGS (petA, psbJ)	LSC	67071	C	66726	C	67073	C	67071	C	67074	C	66945	C	66574	T	66598	C
1815	psbJ	LSC	67081	C	66736	C	67083	C	67081	T	67084	C	66955	C	66584	C	66608	C
1816	psbJ	LSC	67141	A	66796	A	67143	G	67141	A	67144	A	67015	G	66644	A	66668	A
1817	psbJ	LSC	67165	T	66820	T	67167	T	67165	T	67168	T	67039	T	66668	C	66692	T
1818	IGS (psbJ, psbL)	LSC	67281	G	66936	G	67283	G	67281	G	67284	G	67155	G	66784	G	66808	T
1819	IGS (psbJ, psbL)	LSC	67305	A	66960	G	67307	G	67305	G	67308	G	67179	G	66808	G	66832	G
1820	psbL	LSC	67340	G	66995	A	67336	A	67340	G	67343	A	67214	A	66843	G	66867	G
1821	psbL	LSC	67449	G	67104	G	67445	G	67449	G	67452	A	67323	G	66952	G	66976	G
1822	IGS (psbL, psbF)	LSC	67466	A	67121	A	67462	A	67466	A	67469	A	67340	A	66969	G	66993	A
1823	psbF	LSC	67503	T	67158	T	67499	C	67503	T	67506	T	67377	T	67006	T	67030	T
1824	psbF	LSC	67535	G	67190	G	67531	G	67535	G	67538	G	67409	G	67038	G	67062	A
1825	psbE	LSC	67821	A	67476	A	67817	A	67821	A	67824	A	67695	A	67324	A	67348	G
1826	IGS (psbE, petL)	LSC	67854	C	67509	G	67850	G	67854	C	67857	G	67728	G	67357	G	67381	G
1827	IGS (psbE, petL)	LSC	67928	T	67583	C	67924	C	67928	C	67931	C	67802	C	67431	C	67455	C
1828	IGS (psbE, petL)	LSC	67936	T	67591	A	67932	A	67936	T	67939	A	67810	A	67439	T	67463	T
1829	IGS (psbE, petL)	LSC	67938	A	67593	T	67934	G	67938	A	67941	T	67812	T	67441	T	67465	T
1830	IGS (psbE, petL)	LSC	67939	A	67594	A	67935	T	67939	A	67942	A	67813	A	67442	C	67466	A
1831	IGS (psbE, petL)	LSC	68044	G	67699	G	68040	G	68044	G	68047	G	67918	G	67547	G	67571	A
1832	IGS (psbE, petL)	LSC	68065	C	67720	A	68061	A	68065	C	68068	A	67939	A	67568	C	67592	T
1833	IGS (psbE, petL)	LSC	68066	C	67721	C	68062	C	68066	C	68069	C	67940	C	67569	C	67593	A
1834	IGS (psbE, petL)	LSC	68075	T	67730	T	68071	T	68075	T	68078	T	67949	T	67578	T	67602	C
1835	IGS (psbE, petL)	LSC	68092	A	67747	A	68088	A	68092	A	68095	A	67966	A	67595	C	67619	A
1836	IGS (psbE, petL)	LSC	68096	A	67751	A	68092	A	68096	A	68099	A	67970	A	67599	A	67623	C
1837	IGS (psbE, petL)	LSC	68106	G	67761	A	68102	A	68106	G	68109	A	67980	A	67609	G	67633	G
1838	IGS (psbE, petL)	LSC	68137	T	67792	T	68133	T	68137	G	68140	T	68011	T	67640	T	67664	T
1839	IGS (psbE, petL)	LSC	68190	G	67845	T	68186	G	68190	G	68193	G	68064	G	67693	G	67717	G
1840	IGS (psbE, petL)	LSC	68215	A	67870	A	68211	A	68215	A	68218	A	68089	A	67718	A	67742	G
1841	IGS (psbE, petL)	LSC	68217	G	67872	G	68213	G	68217	G	68220	G	68091	G	67720	G	67744	T
1842	IGS (psbE, petL)	LSC	68251	C	67906	C	68247	C	68251	C	68254	C	68125	T	67754	C	67778	C
1843	IGS (psbE, petL)	LSC	68252	A	67907	A	68248	A	68252	A	68255	A	68126	A	67755	G	67779	A
1844	IGS (psbE, petL)	LSC	68379	A	68035	A	68361	A	68379	A	68382	C	68255	A	67884	A	67783	C
1845	IGS (psbE, petL)	LSC	68413	A	68069	A	68395	C	68413	A	68416	A	68289	A	67918	A	67817	A
1846	IGS (psbE, petL)	LSC	68471	T	68127	C	68446	C	68471	T	68474	C	68347	C	67965	T	67875	T
1847	IGS (psbE, petL)	LSC	68552	T	68211	T	68527	T	68552	T	68555	T	68428	T	68046	G	67956	T
1848	IGS (psbE, petL)	LSC	68599	T	68258	C	68574	C	68599	C	68602	C	68475	C	68093	C	68003	C
1849	IGS (psbE, petL)	LSC	68609	T	68268	G	68584	G	68609	T	68612	G	68485	G	68103	G	68013	G
1850	IGS (psbE, petL)	LSC	68621	T	68280	C	68596	C	68621	C	68624	C	68497	C	68115	C	68025	C
1851	IGS (psbE, petL)	LSC	68623	T	68282	T	68598	T	68623	T	68626	T	68499	T	68117	C	68027	T
1852	IGS (psbE, petL)	LSC	68637	C	68296	C	68612	C	68637	C	68640	C	68513	A	68131	C	68041	C
1853	IGS (psbE, petL)	LSC	68671	G	68330	G	68646	G	68671	G	68674	G	68547	G	68165	G	68075	T
1854	IGS (psbE, petL)	LSC	68685	T	68344	T	68660	T	68685	A	68688	T	68561	T	68179	T	68089	T
1855	IGS (psbE, petL)	LSC	68700	A	68359	A	68675	A	68700	A	68703	A	68576	A	68194	A	68104	C
1856	IGS (psbE, petL)	LSC	68724	T	68383	T	68699	T	68724	T	68727	T	68600	T	68218	G	68128	T
1857	IGS (psbE, petL)	LSC	68737	A	68396	A	68712	A	68737	G	68740	A	68613	A	68231	A	68141	A
1858	IGS (psbE, petL)	LSC	68738	G	68397	G	68713	G	68738	G	68741	G	68614	G	68232	T	68142	G
1859	IGS (psbE, petL)	LSC	68750	G	68409	G	68725	C	68750	G	68753	G	68626	G	68244	G	68154	G
1860	IGS (psbE, petL)	LSC	68766	G	68426	G	68741	G	68766	G	68770	G	68642	G	68261	G	68170	A
1861	IGS (psbE, petL)	LSC	68771	T	68431	C	68746	T	68771	T	68775	C	68647	T	68266	T	68175	T
1862	IGS (psbE, petL)	LSC	68776	C	68436	C	68751	C	68776	C	68780	A	68652	C	68271	C	68180	C
1863	IGS (psbE, petL)	LSC	68804	C	68464	C	68779	A	68804	C	68808	C	68680	C	68299	C	68208	C
1864	IGS (psbE, petL)	LSC	68893	G	68553	T	68868	G	68893	G	68897	G	68769	G	68388	G	68297	G
1865	IGS (psbE, petL)	LSC	68936	A	68596	A	68911	C	68936	A	68940	A	68812	A	68431	A	68340	A
1866	IGS (psbE, petL)	LSC	68968	C	68628	C	68943	C	68968	C	68972	C	68844	C	68463	T	68372	C
1867	IGS (psbE, petL)	LSC	69005	C	68665	C	68980	C	69005	A	69009	C	68881	C	68500	C	68409	C
1868	IGS (psbE, petL)	LSC	69053	A	68713	G	69028	G	69053	G	69057	G	68929	G	68548	G	68457	G
1869	IGS (psbE, petL)	LSC	69127	G	68787	G	69102	G	69127	G	69131	G	69003	G	68622	G	68531	A
1870	IGS (psbE, petL)	LSC	69130	C	68790	C	69105	G	69130	C	69134	C	69006	C	68625	C	68534	C
1871	IGS (psbE, petL)	LSC	69137	C	68797	C	69112	C	69137	C	69141	C	69013	C	68632	A	68541	C
1872	IGS (psbE, petL)	LSC	69138	G	68798	A	69113	A	69138	A	69142	A	69014	A	68633	A	68542	A
1873	IGS (psbE, petL)	LSC	69145	C	68805	C	69120	C	69145	C	69149	C	69021	C	68640	C	68549	T
1874	petL	LSC	69150	C	68810	C	69125	C	69150	C	69154	C	69026	C	68645	C	68554	A
1875	petL	LSC	69174	C	68834	T	69149	C	69174	C	69178	T	69050	C	68669	C	68578	C
1876	IGS (petL, petG)	LSC	69262	C	68922	C	69237	C	69262	C	69266	C	69138	C	68757	C	68666	G
1877	IGS (petL, petG)	LSC	69276	A	68936	A	69251	C	69276	A	69280	A	69152	A	68771	A	68680	A
1878	IGS (petL, petG)	LSC	69280	C	68940	C	69255	C	69280	C	69284	C	69156	A	68775	C	68684	C
1879	IGS (petL, petG)	LSC	69284	T	68944	T	69259	T	69284	T	69288	T	69160	C	68779	T	68688	T
1880	IGS (petL, petG)	LSC	69321	T	68981	T	69296	C	69321	T	69325	T	69197	T	68816	T	68725	T
1881	IGS (petL, petG)	LSC	69391	C	69051	C	69366	C	69391	C	69395	C	69267	C	68886	C	68795	T
1882	IGS (petG, trnW-CCA)	LSC	69537	T	69197	T	69513	T	69537	T	69539	T	69413	G	69031	T	68941	T
1883	IGS (petG, trnW-CCA)	LSC	69576	C	69238	C	69550	C	69576	C	69577	C	69451	C	69071	T	68978	C
1884	IGS (petG, trnW-CCA)	LSC	69601	C	69263	C	69575	C	69601	C	69602	C	69476	T	69096	C	69003	C
1885	IGS (petG, trnW-CCA)	LSC	69616	T	69278	C	69590	T	69616	T	69617	C	69491	C	69111	T	69018	T
1886	IGS (petG, trnW-CCA)	LSC	69638	C	69300	C	69612	C	69638	C	69639	C	69513	C	69133	C	69040	G
1887	IGS (trnW-CCA, trnP-UGG)	LSC	69796	C	69458	C	69770	A	69796	C	69797	C	69671	C	69291	C	69202	C
1888	IGS (trnW-CCA, trnP-UGG)	LSC	69829	T	69491	T	69803	T	69829	T	69830	T	69704	T	69324	T	69235	G
1889	IGS (trnW-CCA, trnP-UGG)	LSC	69843	G	69505	G	69817	G	69843	G	69844	G	69718	G	69338	A	69249	G
1890	IGS (trnW-CCA, trnP-UGG)	LSC	69845	A	69507	A	69819	A	69845	A	69846	A	69720	T	69340	A	69251	A
1891	IGS (trnW-CCA, trnP-UGG)	LSC	69904	T	69566	G	69878	G	69904	G	69905	G	69779	G	69399	G	69310	G
1892	IGS (trnP-UGG, psaJ)	LSC	70024	C	69686	C	69998	C	70024	C	70025	C	69899	T	69519	C	69441	C
1893	IGS (trnP-UGG, psaJ)	LSC	70084	T	69746	T	70058	T	70084	T	70085	T	69959	C	69579	T	69501	T
1894	IGS (trnP-UGG, psaJ)	LSC	70091	T	69753	T	70065	T	70091	G	70092	G	69966	T	69586	T	69508	T
1895	IGS (trnP-UGG, psaJ)	LSC	70132	A	69801	A	70111	A	70132	A	70140	A	70014	A	69634	A	69549	G
1896	IGS (trnP-UGG, psaJ)	LSC	70136	G	69805	G	70115	G	70136	A	70144	G	70018	G	69638	G	69553	G
1897	IGS (trnP-UGG, psaJ)	LSC	70144	G	69813	G	70123	G	70144	G	70152	G	70026	C	69646	G	69561	G
1898	IGS (trnP-UGG, psaJ)	LSC	70148	C	69817	A	70127	A	70148	A	70156	A	70030	A	69650	C	69565	C
1899	IGS (trnP-UGG, psaJ)	LSC	70158	A	69827	A	70137	A	70158	A	70166	A	70040	A	69660	C	69575	A
1900	IGS (trnP-UGG, psaJ)	LSC	70182	G	69851	G	70161	G	70182	G	70190	G	70064	T	69684	G	69599	G
1901	IGS (trnP-UGG, psaJ)	LSC	70187	A	69856	A	70166	A	70187	A	70195	A	70069	A	69689	A	69604	G
1902	IGS (trnP-UGG, psaJ)	LSC	70213	G	69882	G	70192	G	70213	G	70221	G	70095	G	69715	T	69630	G
1903	IGS (trnP-UGG, psaJ)	LSC	70238	C	69907	C	70217	C	70238	C	70246	C	70120	C	69740	C	69655	T
1904	IGS (trnP-UGG, psaJ)	LSC	70262	G	69931	G	70241	G	70262	T	70270	G	70144	G	69764	G	69679	G
1905	psaJ	LSC	70423	G	70092	G	70410	G	70423	G	70439	G	70313	C	69933	G	69834	G
1906	psaJ	LSC	70484	T	70153	T	70471	T	70484	T	70500	T	70374	C	69994	T	69895	C
1907	IGS (psaJ, rpl33)	LSC	70536	G	70205	A	70523	A	70536	A	70552	A	70426	A	70046	A	69947	A
1908	IGS (psaJ, rpl33)	LSC	70542	T	70211	T	70529	T	70542	T	70558	T	70432	T	70052	T	69953	G
1909	IGS (psaJ, rpl33)	LSC	70558	T	70227	T	70545	T	70558	T	70574	T	70448	T	70068	T	69969	C
1910	IGS (psaJ, rpl33)	LSC	70570	T	70239	T	70557	T	70570	T	70586	T	70461	C	70080	T	69981	T
1911	IGS (psaJ, rpl33)	LSC	70592	G	70261	G	70579	G	70592	G	70608	G	70483	A	70102	G	70003	G
1912	IGS (psaJ, rpl33)	LSC	70593	G	70262	G	70580	G	70593	G	70609	G	70484	G	70103	G	70004	C
1913	IGS (psaJ, rpl33)	LSC	70625	T	70294	T	70612	T	70625	C	70641	T	70516	T	70135	T	70036	T
1914	IGS (psaJ, rpl33)	LSC	70641	C	70310	T	70628	T	70641	C	70657	T	70532	T	70151	T	70052	T
1915	IGS (psaJ, rpl33)	LSC	70671	A	70340	A	70658	A	70671	A	70687	A	70562	C	70181	A	70082	A
1916	IGS (psaJ, rpl33)	LSC	70672	G	70341	A	70659	G	70672	G	70688	A	70563	G	70182	G	70083	G
1917	IGS (psaJ, rpl33)	LSC	70925	A	70594	A	70917	A	70925	A	70941	G	70821	A	70435	A	70328	A
1918	rpl33	LSC	70945	A	70614	A	70937	G	70945	A	70961	A	70841	A	70455	A	70348	A
1919	rpl33	LSC	71017	C	70686	C	71009	C	71017	C	71033	C	70913	C	70527	T	70420	C
1920	rpl33	LSC	71059	T	70728	C	71051	T	71059	T	71075	T	70955	T	70569	T	70462	T
1921	rpl33	LSC	71125	G	70794	G	71117	G	71125	G	71141	A	71021	G	70635	G	70528	G
1922	IGS (rpl33, rps18)	LSC	71146	G	70815	G	71138	G	71146	G	71162	G	71042	G	70656	C	70549	G
1923	IGS (rpl33, rps18)	LSC	71177	G	70846	G	71169	G	71177	T	71193	G	71073	G	70687	G	70580	G
1924	IGS (rpl33, rps18)	LSC	71188	G	70857	T	71180	T	71188	T	71204	T	71084	T	70698	T	70591	T
1925	IGS (rpl33, rps18)	LSC	71258	C	70927	C	71250	C	71258	C	71274	C	71154	C	70768	C	70661	T
1926	rps18	LSC	71319	G	70988	C	71311	C	71319	G	71335	C	71215	C	70829	C	70722	C
1927	rps18	LSC	71333	A	71002	A	71325	A	71333	A	71349	A	71229	A	70843	A	70736	C
1928	rps18	LSC	71441	A	71110	A	71433	A	71441	A	71457	A	71337	A	70951	G	70844	A
1929	rps18	LSC	71462	G	71131	G	71454	G	71462	G	71478	G	71358	G	70972	G	70865	A
1930	IGS (rps18, rpl20)	LSC	71607	T	71276	T	71599	T	71607	T	71623	T	71503	T	71117	C	71010	T
1931	IGS (rps18, rpl20)	LSC	71678	T	71347	C	71670	C	71678	C	71694	C	71574	C	71188	C	71081	C
1932	IGS (rps18, rpl20)	LSC	71679	C	71348	C	71671	C	71679	C	71695	T	71575	C	71189	C	71082	C
1933	IGS (rps18, rpl20)	LSC	71701	A	71370	A	71693	C	71701	A	71717	A	71597	A	71211	A	71104	A
1934	IGS (rps18, rpl20)	LSC	71803	C	71472	T	71795	C	71803	C	71819	C	71699	C	71312	C	71207	C
1935	IGS (rps18, rpl20)	LSC	71804	G	71473	A	71796	G	71804	G	71820	G	71700	G	71313	G	71208	C
1936	IGS (rps18, rpl20)	LSC	71818	C	71487	C	71810	C	71818	C	71834	C	71714	A	71327	C	71222	C
1937	IGS (rps18, rpl20)	LSC	71845	C	71514	C	71837	C	71845	C	71861	C	71741	C	71354	C	71249	T
1938	IGS (rps18, rpl20)	LSC	71846	G	71515	G	71838	G	71846	G	71862	G	71742	G	71355	A	71250	G
1939	IGS (rps18, rpl20)	LSC	71860	T	71529	G	71852	T	71860	T	71876	T	71756	T	71369	T	71264	T
1940	IGS (rps18, rpl20)	LSC	71864	G	71533	C	71856	G	71864	G	71880	C	71760	G	71373	G	71268	G
1941	rpl20	LSC	71902	G	71571	G	71894	G	71902	G	71918	G	71798	G	71411	G	71300	A
1942	rpl20	LSC	71920	A	71589	A	71912	A	71920	A	71936	A	71816	A	71429	A	71318	G
1943	rpl20	LSC	71926	A	71595	A	71918	A	71926	A	71942	A	71822	A	71435	A	71324	G
1944	rpl20	LSC	71989	A	71658	G	71981	G	71989	G	72005	A	71885	G	71498	G	71387	A
1945	rpl20	LSC	71991	G	71660	G	71983	G	71991	T	72007	G	71887	G	71500	G	71389	T
1946	rpl20	LSC	72021	T	71690	T	72013	T	72021	G	72037	T	71917	T	71530	T	71419	T
1947	rpl20	LSC	72094	C	71763	C	72086	C	72094	C	72110	C	71990	C	71603	T	71492	C
1948	rpl20	LSC	72172	T	71841	T	72164	T	72172	T	72188	T	72068	T	71681	T	71570	G
1949	rpl20	LSC	72187	A	71856	G	72179	A	72187	A	72203	G	72083	A	71696	A	71585	A
1950	IGS (rpl20, rps12)	LSC	72402	C	72073	C	72386	T	72402	C	72417	C	72298	C	71912	C	71800	C
1951	IGS (rpl20, rps12)	LSC	72448	C	72119	C	72432	C	72448	C	72463	C	72344	C	71958	C	71852	T
1952	IGS (rpl20, rps12)	LSC	72460	A	72131	A	72444	A	72460	A	72475	C	72356	A	71970	A	71864	A
1953	IGS (rpl20, rps12)	LSC	72480	T	72151	T	72463	T	72480	T	72495	T	72376	T	71989	G	71898	T
1954	IGS (rpl20, rps12)	LSC	72502	T	72173	T	72485	G	72502	T	72517	T	72398	T	72011	C	71920	T
1955	IGS (rpl20, rps12)	LSC	72521	G	72192	G	72504	G	72521	G	72536	A	72417	G	72030	G	71939	G
1956	IGS (rpl20, rps12)	LSC	72544	T	72215	T	72527	T	72544	T	72559	G	72440	T	72053	T	71962	T
1957	IGS (rpl20, rps12)	LSC	72638	T	72309	T	72621	C	72638	T	72653	T	72534	T	72147	T	72055	T
1958	IGS (rpl20, rps12)	LSC	72715	A	72386	A	72698	A	72715	A	72730	A	72611	A	72224	G	72132	G
1959	IGS (rpl20, rps12)	LSC	72732	A	72403	A	72715	A	72732	A	72747	A	72628	A	72241	A	72149	C
1960	IGS (rpl20, rps12)	LSC	72736	C	72407	C	72719	C	72736	C	72751	C	72632	C	72245	T	72153	C
1961	IGS (rpl20, rps12)	LSC	72742	C	72413	C	72725	C	72742	C	72757	C	72638	C	72251	T	72159	C
1962	IGS (rpl20, rps12)	LSC	72749	T	72420	T	72732	T	72749	T	72764	T	72645	T	72258	T	72166	C
1963	IGS (rpl20, rps12)	LSC	72750	A	72421	C	72733	A	72750	A	72765	C	72646	A	72259	A	72167	A
1964	IGS (rpl20, rps12)	LSC	72777	C	72448	T	72760	C	72777	C	72791	T	72673	C	72286	C	72193	T
1965	IGS (rpl20, rps12)	LSC	72801	G	72472	G	72784	G	72801	G	72815	G	72697	A	72310	G	72217	G
1966	IGS (rpl20, rps12)	LSC	72837	G	72508	G	72820	G	72837	G	72851	G	72733	G	72346	G	72253	C
1967	IGS (rpl20, rps12)	LSC	72857	T	72528	C	72840	T	72857	T	72871	C	72753	C	72366	T	72273	C
1968	IGS (rpl20, rps12)	LSC	72858	G	72529	G	72841	G	72858	G	72872	G	72754	G	72367	A	72274	G
1969	IGS (rpl20, rps12)	LSC	72883	A	72554	A	72866	A	72883	A	72897	A	72779	G	72392	A	72299	A
1970	IGS (rpl20, rps12)	LSC	72913	G	72584	G	72896	A	72913	G	72927	G	72809	A	72422	G	72329	A
1971	IGS (rpl20, rps12)	LSC	72937	C	72608	A	72920	C	72937	C	72951	C	72833	C	72446	C	72353	C
1972	IGS (rpl20, rps12)	LSC	72973	T	72644	T	72956	T	72973	G	72987	G	72869	T	72482	T	72389	G
1973	rps12-exon 1, rps12-2-exon 1	LSC	73086	C	72757	C	73069	C	73086	C	73100	C	72982	C	72595	T	72502	C
1974	IGS (rps12/rps12-2, clpP)	LSC	73135	T	72806	T	73118	T	73135	T	73149	T	73031	T	72644	T	72551	C
1975	IGS (rps12/rps12-2, clpP)	LSC	73155	T	72826	T	73138	T	73155	C	73169	T	73051	T	72664	C	72571	C
1976	IGS (rps12/rps12-2, clpP)	LSC	73169	C	72840	T	73152	T	73169	C	73183	T	73065	T	72678	T	72585	T
1977	IGS (rps12/rps12-2, clpP)	LSC	73193	C	72864	C	73176	C	73193	C	73207	C	73089	C	72702	C	72609	A
1978	IGS (rps12/rps12-2, clpP)	LSC	73239	T	72910	T	73222	T	73239	T	73253	T	73135	T	72748	T	72655	A
1979	clpP-exon3	LSC	73287	C	72958	T	73270	C	73287	C	73301	C	73183	C	72796	C	72703	T
1980	clpP-exon3	LSC	73291	C	72962	C	73274	G	73291	C	73305	C	73187	G	72800	G	72707	C
1981	clpP-exon3	LSC	73375	C	73046	C	73358	C	73375	C	73389	C	73271	C	72884	C	72791	T
1982	clpP-exon3	LSC	73400	T	73071	T	73383	T	73400	T	73414	T	73296	T	72909	G	72816	T
1983	clpP-exon3	LSC	73484	A	73155	C	73467	A	73484	A	73498	C	73380	A	72993	A	72900	A
1984	clpP-intron 2	LSC	73534	G	73205	G	73517	G	73534	G	73548	G	73430	G	73043	T	72950	G
1985	clpP-intron 2	LSC	73577	A	73248	C	73560	C	73577	A	73591	C	73475	C	73086	A	72993	A
1986	clpP-intron 2	LSC	73664	T	73335	T	73647	T	73664	T	73678	T	73562	T	73168	T	73080	G
1987	clpP-intron 2	LSC	73679	T	73350	T	73662	T	73679	T	73693	T	73577	T	73183	T	73095	G
1988	clpP-intron 2	LSC	73741	A	73412	A	73724	A	73741	C	73755	A	73639	A	73245	A	73157	A
1989	clpP-intron 2	LSC	73795	T	73466	T	73778	T	73795	T	73809	T	73693	T	73299	T	73211	G
1990	clpP-intron 2	LSC	73845	G	73516	G	73828	T	73845	G	73859	G	73743	T	73349	T	73261	G
1991	clpP-intron 2	LSC	73846	A	73517	A	73829	A	73846	A	73860	A	73744	A	73350	A	73262	G
1992	clpP-intron 2	LSC	73861	T	73532	T	73845	T	73861	T	73875	T	73758	T	73365	T	73277	G
1993	clpP-intron 2	LSC	73883	T	73554	T	73867	G	73883	T	73897	T	73780	T	73387	G	73308	T
1994	clpP-intron 2	LSC	73910	A	73581	A	73894	G	73910	A	73924	A	73807	A	73414	A	73335	A
1995	clpP-intron 2	LSC	73933	T	73604	C	73917	C	73933	C	73947	C	73830	C	73437	C	73358	C
1996	clpP-intron 2	LSC	73962	A	73633	A	73946	A	73962	A	73976	A	73859	A	73466	A	73387	G
1997	clpP-intron 2	LSC	73969	T	73640	T	73953	T	73969	T	73983	T	73866	T	73473	T	73394	C
1998	clpP-intron 2	LSC	73985	T	73656	T	73969	C	73985	T	73999	T	73882	T	73489	T	73410	T
[truncated: 1,324 more rows]

## Sheet: Table_S8.
Table S8. Indels identified in the nine Ribes chloroplast genomes
Number	Position	Location	Nucleotide position	Red/White currant (Ribes rubrum)	Nucleotide position	Blackcurrant (Ribes nigrum)	Nucleotide position	Gooseberry (Ribes uva-crispa)	Nucleotide position	Ribes glaciale	Nucleotide position	Ribes nevadense	Nucleotide position	Ribes roezlii	Nucleotide position	Ribes odoratum	Nucleotide position	Ribes fasciculatum var. chinense
1	IGS (trnH-GUG, psbA)	LSC	83	A	81	ATACTAT	81	ATACTAT	83	ATACTAT	5	ATACTAT	5	ATACTAT	81	ATACTAT	80	ATACTAT
2	IGS (trnH-GUG, psbA)	LSC	88	TTT	92	TTA	92	TTA	88	TTT	16	TTA	16	TTA	92	T	91	GTA
3	IGS (trnH-GUG, psbA)	LSC	176	TC	180	TC	180	TC	176	TC	104	TC	104	TC	178	TC	179	T
4	IGS (trnH-GUG, psbA)	LSC	189	TTCTT	193	TTCT	193	TTC	189	TTCTT	117	TTCT	117	TTC	191	TTCT	191	T
5	IGS (trnH-GUG, psbA)	LSC	220	A	223	A	222	AATATATATATAAAT	220	A	147	A	146	A	221	A	218	A
6	IGS (trnH-GUG, psbA)	LSC	373	A	376	AGAAATT	389	AGAAATT	373	A	300	AGAAATT	299	AGAAATT	374	AGAAATT	371	AGAAATT
7	IGS (psbA, trnK-UUU)	LSC	1680	A	1689	A	1702	A	1680	A	1613	A	1612	A	1687	AT	1684	ATTGTGAA
8	IGS (psbA, trnK-UUU)	LSC	1697	A	1706	A	1719	A	1697	A	1630	A	1629	A	1705	AATAAAT	1708	A
9	trnK-UUU-intron 1	LSC	1792	TGTTCAAA	1801	TGTTCAAA	1814	TGTTCAAA	1792	TGTTCAAA	1725	TGTTCAAA	1724	TGTTCAAA	1806	T	1803	TGTTCAAA
10	trnK-UUU-intron 1	LSC	1885	T	1894	T	1907	TC	1885	T	1818	T	1817	T	1892	T	1896	T
11	trnK-UUU-intron 1	LSC	1901	TA	1910	TA	1924	TA	1901	TA	1834	T	1833	TA	1908	TA	1912	TA
12	trnK-UUU-intron 1	LSC	3706	C	3715	C	3729	C	3706	C	3638	C	3638	CTAC	3713	C	3717	C
13	trnK-UUU-intron 1	LSC	3788	GA	3797	G	3811	GA	3788	GA	3720	GA	3723	GA	3795	GA	3799	GA
14	trnK-UUU-intron 1	LSC	3874	TAA	3882	TAA	3897	TA	3874	TAA	3806	TAA	3809	TAA	3881	TA	3885	T
15	trnK-UUU-intron 1	LSC	4099	GTGCCGA	4107	G	4121	G	4099	GTGCCGA	4031	G	4034	G	4105	GTGCCGA	4108	GTGCCGA
16	IGS (trnK-UUU, rps16)	LSC	4397	TAAAAAAAAAATTCTACTTGATTCTGAACAT	4399	TAAAAAAAAAATTCTACTTGATTCTGAACAT	4413	TAAAAAAAATTCTACTTGATTCTGAACAT	4397	TAAAAAAAATTCTACTTGATTCTGAACAT	4323	TAAAAAAAAATTCTACTTGATTCTGAACAT	4326	TAAAAAAAAATTCTACTTGATTCCGAACAT	4403	AAAAAAAAAAATTCGACTTGATTCTTAACAT	4406	T
17	IGS (trnK-UUU, rps16)	LSC	4510	ATTT	4512	ATTTT	4524	ATT	4510	AT	4435	AT	4438	AT	4516	ATTT	4489	A
18	IGS (trnK-UUU, rps16)	LSC	4593	CCAAACC	4596	CCAAACC	4606	CCAAACC	4593	CAAAACC	4516	CCAAACC	4519	CCAAACCTATGGA	4599	CCAAACC	4569	C
19	IGS (trnK-UUU, rps16)	LSC	4680	AGCATACAAT	4683	AGCATACAAT	4693	A	4680	AGCATACAAT	4603	AGCATACAAT	4612	AGCATACAAT	4686	AGCATACAAT	4650	AGCATACAAT
20	IGS (trnK-UUU, rps16)	LSC	4700	GAAA	4703	G	4704	G	4700	GA	4623	GA	4632	GAAA	4706	GAA	4670	GAA
21	IGS (trnK-UUU, rps16)	LSC	4740	TAATCTACATAGAT	4740	TAATCTACATAGAT	4741	TAATCTACATAGATA	4740	TAATCTACATAGAT	4661	TAATCTACATAGAT	4672	TAATCTACATAGAT	4745	T	4709	TAATCTACATAGATAAAAAAAAGGGTGTAGATAGAG
22	IGS (trnK-UUU, rps16)	LSC	4882	TA	4882	TA	4884	TT	4882	TA	4803	TA	4814	TT	4874	T	4873	TA
23	IGS (trnK-UUU, rps16)	LSC	5117	C	5100	C	5167	C	5117	C	5038	C	5032	C	5072	CTTT	5092	C
24	rps16-intron 1	LSC	5385	A	5368	A	5435	A	5385	A	5306	A	5300	A	5343	A	5360	ACCC
25	rps16-intron 1	LSC	5431	GA	5414	G	5481	G	5431	GA	5352	G	5346	GA	5389	GA	5409	G
26	rps16-intron 1	LSC	5519	CT	5501	CT	5568	C	5519	CT	5439	CT	5434	C	5477	CT	5496	CT
27	rps16-intron 1	LSC	5539	G	5521	GA	5587	G	5539	GA	5459	GA	5453	GA	5497	GAA	5516	GA
28	rps16-intron 1	LSC	5806	CT	5789	CT	5854	C	5806	C	5727	CT	5721	C	5766	C	5784	CT
29	rps16-intron 1	LSC	5980	C	5963	C	6027	CAA	5980	C	5901	C	5894	CAA	5939	C	5958	C
30	rps16-intron 1	LSC	6087	GGGGT	6070	GGGGGT	6136	GGGGGT	6087	GGGGT	6008	GCGGGT	6003	GGGGGT	6046	A	6065	GGGGT
31	IGS (rps16, trnQ-UUG)	LSC	6413	TT	6558	TTTTTTTTTTA	6625	T	6413	TT	6495	TT	6489	TT	6528	T	6592	ACT
32	IGS (rps16, trnQ-UUG)	LSC	6579	TTATTC	6723	TTATTC	6781	TTATTC	6579	TTATTC	6652	TTATTC	6646	TTATTC	6566	TTATTC	6749	T
33	IGS (rps16, trnQ-UUG)	LSC	6818	AATAAGTTTTTTGCAATTTTGTCC	6962	AATAAGTTTTTTGCAATTTTTCC	7020	A	6818	AATAAGTTTTTTGCAATTTTGTCC	6891	AATAAGTTTTTTGCAATTTTTCC	6885	AATAAGTTTTTTGCAATTTTTCC	6805	AATAAGTTTTTTGCAATTTTTCC	6983	AATAAGTTTTCTGCAATTTTTCC
34	IGS (rps16, trnQ-UUG)	LSC	6843	TA	6986	T	7022	T	6843	TA	6915	T	6909	T	6829	TA	7007	T
35	IGS (rps16, trnQ-UUG)	LSC	6908	GCTGTT	7050	ACTGTT	7086	ACTGTT	6908	GCTGTT	6979	A	6973	ACTGTT	6894	ACTGTT	7071	ACTGTT
36	IGS (rps16, trnQ-UUG)	LSC	6929	G	7071	GA	7107	G	6929	G	6995	G	6994	GA	6915	GA	7092	G
37	IGS (rps16, trnQ-UUG)	LSC	7078	A	7221	ATTCTAT	7256	ATTCTAT	7078	A	7144	ATTCTAT	7144	ATTCTAT	7065	A	7241	A
38	IGS (rps16, trnQ-UUG)	LSC	7579	T	7316	TAAA	7740	T	7579	T	7624	T	7628	T	7569	T	7751	T
39	IGS (rps16, trnQ-UUG)	LSC	7602	A	7342	ATTCTATA	7763	ATTCTATA	7602	A	7647	ATTCTATATTCTATAC	7651	A	7592	A	7774	A
40	IGS (rps16, trnQ-UUG)	LSC	7659	CTGACAT	7406	CTGATAT	7827	CTGATAT	7659	CTGATAT	7719	CTGATAT	7708	CTGATAT	7649	CTGATAT	7831	C
41	IGS (trnQ-UUG, psbK)	LSC	8032	T	7779	T	8200	T	8032	T	8092	T	8081	T	8022	T	8198	TTTTTCCTTA
42	IGS (psbK, psbI)	LSC	8319	G	8066	GA	8487	GA	8319	GA	8379	GA	8368	GA	8309	GAA	8494	GAA
43	IGS (psbK, psbI)	LSC	8334	CAATTG	8082	CAATTG	8503	CAATTG	8334	CAATTG	8395	CAATTG	8384	C	8326	CAATTG	8511	CAATTG
44	IGS (psbK, psbI)	LSC	8419	A	8167	ACCTCATTC	8588	A	8419	A	8480	A	8464	A	8411	A	8596	A
45	IGS (psbK, psbI)	LSC	8436	TTTC	8192	TTTC	8605	TTTC	8436	TTTC	8497	TTTC	8481	TTCC	8428	T	8613	TTTC
46	IGS (psbK, psbI)	LSC	8457	C	8213	C	8626	C	8457	C	8518	CCTATT	8502	CCTATT	8446	CCTATT	8634	C
47	IGS (psbK, psbI)	LSC	8461	T	8217	T	8630	T	8461	T	8527	T	8511	T	8455	TG	8638	T
48	IGS (psbK, psbI)	LSC	8569	AAGCAC	8325	AAGCAC	8738	AAGCAC	8569	AAGCAC	8635	AAGCAC	8619	AAGCAC	8564	A	8746	AAGCAC
49	IGS (psbK, psbI)	LSC	8589	T	8345	T	8758	T	8589	T	8655	T	8639	T	8579	TCAAAA	8766	T
50	IGS (trnS-GCU, trnG-GCC)	LSC	9061	TACACA	8817	TACACA	9230	TACACA	9061	TACACA	9127	TACACA	9111	T	9056	TACACA	9238	TACACA
51	IGS (trnS-GCU, trnG-GCC)	LSC	9094	CTCTTTATTCTAA	8850	C	9263	C	9094	CTCTTTATTCTAA	9160	CTCTTTAT	9139	C	9089	CTCTTTATTCTAAT	9271	C
52	IGS (trnS-GCU, trnG-GCC)	LSC	9126	G	8870	G	9283	G	9126	G	9187	G	9159	G	9122	G	9291	ATTAGAT
53	IGS (trnS-GCU, trnG-GCC)	LSC	9198	T	8942	TAAAAAA	9355	T	9198	T	9259	TATAA	9231	T	9194	T	9369	T
54	IGS (trnS-GCU, trnG-GCC)	LSC	9224	CCA	8974	CC	9381	CC	9224	C	9289	CC	9257	CC	9220	CCA	9395	CC
55	IGS (trnS-GCU, trnG-GCC)	LSC	9296	AC	9045	AC	9452	AC	9296	A	9360	AC	9328	AC	9292	AC	9466	AC
56	IGS (trnS-GCU, trnG-GCC)	LSC	9301	TAGATTCAAA	9050	TAGATTCAAA	9457	TAGATTCGAA	9301	TAGATTCAAA	9365	TAGATTCAAA	9333	TAGATTCAAA	9297	TAGATTCAAA	9471	T
57	IGS (trnS-GCU, trnG-GCC)	LSC	9516	TT	9265	TG	9672	TG	9516	TT	9580	TA	9548	TG	9512	T	9677	T
58	trnG-GCC-intron 1	LSC	10126	GA	9877	G	10283	G	10126	GA	10189	G	10158	G	10122	G	10021	G
59	trnG-GCC-intron 1	LSC	10132	A	9882	A	10288	A	10132	A	10194	A	10163	A	10127	A	10026	ATTGGAT
60	trnG-GCC-intron 1	LSC	10525	GT	10275	GTTTT	10681	GT	10525	GT	10587	GTT	10556	GTTT	10520	G	10425	GT
61	IGS (trnG-GCC, trnR-UCU)	LSC	10710	ATTTACTAA	10463	A	10866	A	10710	A	10773	A	10743	A	10704	A	10610	A
62	IGS (trnG-GCC, trnR-UCU)	LSC	10731	AATTT	10476	AATTT	10879	A	10731	AATTT	10786	AATTTAAATTA	10756	AATTA	10717	CATTT	10623	CATTT
63	IGS (trnG-GCC, trnR-UCU)	LSC	10890	TTAAAATGCGA	10635	TTAAAATGCG	11034	TAAAAATGCG	10890	TTAAAATGCG	10951	TTTAAATGCG	10915	TTAAAATGCG	10876	A	10733	AAAAAATGCGA
64	IGS (trnG-GCC, trnR-UCU)	LSC	10907	A	10651	A	11050	A	10907	A	10967	A	10931	A	10883	A	10750	AAAAAGCGT
65	IGS (trnR-UCU, atpA)	LSC	10998	TTTCCATA	10742	T	11141	G	10998	TTTCCATA	11058	T	11022	T	10974	T	10849	T
66	IGS (trnR-UCU, atpA)	LSC	11017	GATTTTTAT	10754	GATTTTTAG	11153	GATTTTTAG	11017	GATTTTTAG	11070	GATTTTTAG	11034	GATTTTTAG	10986	GATTTTTAG	10861	G
67	IGS (trnR-UCU, atpA)	LSC	11114	TAA	10851	TA	11250	TAA	11114	T	11167	TAA	11131	TAA	11083	TAAA	10950	TATTCAA
68	IGS (trnR-UCU, atpA)	LSC	11144	CTA	10880	CTA	11280	C	11144	CTA	11197	CTA	11161	CTA	11114	CTA	10984	CTA
69	IGS (atpA, atpF)	LSC	12756	C	12492	CA	12890	CAAAAAA	12756	CAA	12809	C	12773	CA	12726	CAA	12596	CAA
70	IGS (atpA, atpF)	LSC	12770	A	12507	A	12910	A	12770	A	12823	A	12788	A	12742	ATAATGCC	12612	A
71	atpF-intron 1	LSC	13320	CT	13057	CT	13460	CT	13320	CT	13373	C	13338	CT	13299	CTT	13162	CT
72	atpF-intron 1	LSC	13434	GA	13171	GA	13574	GA	13434	GA	13486	GA	13452	GA	13414	GA	13276	G
73	atpF-intron 1	LSC	13467	G	13204	G	13607	G	13467	G	13519	G	13485	GT	13447	GT	13308	G
74	atpF-intron 1	LSC	13853	T	13590	T	13993	T	13853	T	13905	T	13872	TAACG	13834	T	13694	T
75	IGS (atpF, atpH)	LSC	14145	C	13882	T	14285	T	14145	T	14197	T	14168	T	14126	G	13986	TTC
76	IGS (atpF, atpH)	LSC	14158	T	13895	T	14298	T	14158	T	14210	T	14181	T	14139	T	14001	TTTTAA
77	IGS (atpF, atpH)	LSC	14184	ATTT	13921	ATTTTT	14324	ATT	14184	A	14236	ATT	14207	ATTT	14165	ATTTT	14032	ATTTTTTTT
78	IGS (atpF, atpH)	LSC	14490	TAAG	14229	ACTT	14629	ACTT	14490	AAAACTTTTT	14541	ACTT	14513	ACTT	14472	AACTT	14343	ACTT
79	IGS (atpH, atpI)	LSC	14785	T	14524	T	14924	T	14785	T	14836	T	14808	TA	14768	T	14638	T
80	IGS (atpH, atpI)	LSC	14942	AGTCTTT	14681	AGTCTTT	15081	AGTCTTT	14942	AGTCTTT	14993	A	14966	AGTCTTT	14925	A	14795	A
81	IGS (atpH, atpI)	LSC	15254	TA	14993	TA	15393	T	15254	TA	15299	TA	15278	TA	15231	TA	15101	T
82	IGS (atpH, atpI)	LSC	15294	GTTTGACCC	15033	GTTTGACCC	15432	GTTCGACCC	15294	GTTTGACCC	15339	GTTTGACCC	15318	GTTCGACCC	15271	G	15140	GTTTGACCC
83	IGS (atpH, atpI)	LSC	15313	ACTAAAC	15052	ACTAAAC	15451	ACTAAAC	15313	A	15358	ACTAAAC	15337	ACTAAAC	15282	ACTAAAC	15159	ACTAAAC
84	IGS (atpH, atpI)	LSC	15332	C	15071	C	15470	C	15332	C	15377	C	15356	C	15301	C	15178	CTTT
85	IGS (atpH, atpI)	LSC	15358	C	15097	C	15496	C	15358	C	15403	C	15382	C	15327	C	15207	CTT
86	IGS (atpH, atpI)	LSC	15424	C	15163	C	15562	C	15424	CAAATTATTGC	15469	C	15448	C	15393	C	15275	C
87	IGS (atpH, atpI)	LSC	15543	A	15282	ACTTCTTTTTTTTATCGCACGTC	15681	ACTTCTTTTTTTTATCGCACGTC	15543	ACTTCTTTTTTTTATCGCACGTC	15588	ACTTCTTTTTTTTATCGCACGTC	15567	ACTTCTTTTTTTTATCGCACGTC	15512	ACTTCTTTTTTTTATCGCACGTC	15394	ACTTCTTTTTTTTATCGCACGCC
88	IGS (atpH, atpI)	LSC	15617	CAATATGG	15378	CAATATGG	15777	CAATAGGG	15617	CAATATGG	15684	CAATATGG	15663	CAATATGG	15608	CAATATGG	15490	C
89	IGS (atpH, atpI)	LSC	15701	CT	15462	CT	15861	CTT	15701	CT	15768	CT	15747	C	15692	CT	15567	CT
90	IGS (atpH, atpI)	LSC	15736	T	15497	T	15897	T	15736	T	15803	T	15781	T	15727	T	15602	TTT
91	IGS (atpH, atpI)	LSC	15769	TTGTATA	15530	TTGTATA	15930	TTGTATA	15769	TTGTATA	15836	T	15814	TTGTATA	15760	TTGTATA	15637	TTGTATA
92	IGS (atpH, atpI)	LSC	15780	TGTTCCTTAA	15541	T	15941	T	15780	TGTTCCTTAA	15841	T	15825	T	15771	TGTTCCTTAA	15648	TGTTCCTTAA
93	IGS (atpH, atpI)	LSC	15826	TA	15578	T	15978	T	15826	T	15878	T	15862	TAA	15817	TA	15694	T
94	IGS (rps2, rpoC2)	LSC	17521	CT	17272	CT	17672	CT	17521	CT	17572	C	17558	CT	17512	CT	17388	CT
95	IGS (rps2, rpoC2)	LSC	17532	TGAA	17283	TTTGAAA	17683	TC	17532	TCAAAA	17582	TTCAAAA	17569	TTCAAAA	17523	TTCAAA	17399	TCAAAA
96	IGS (rps2, rpoC2)	LSC	17599	A	17353	A	17748	A	17599	A	17652	A	17639	A	17592	A	17468	AGATTG
97	IGS (rps2, rpoC2)	LSC	17659	C	17413	C	17808	C	17659	CTTTATTACT	17712	C	17699	C	17652	C	17533	C
98	IGS (rps2, rpoC2)	LSC	17707	TA	17461	TAAAA	17856	TAAA	17707	TA	17760	TAA	17747	TAAAA	17700	T	17581	TTA
99	rpoC1-exon 2	LSC	22370	TATACCC	22127	TATACCT	22521	TATACCT	22370	TATACCC	22424	TATACCT	22413	TATACCT	22362	TATACCT	22245	T
100	rpoC1-intron 1	LSC	23691	T	23448	T	23842	TT	23691	T	23745	TC	23734	TC	23683	TC	23560	TC
101	rpoC1-intron 1	LSC	23858	CCTTTTATTTCT	23615	C	24010	C	23858	CCTTTTATTTCT	23913	C	23902	C	23851	CCTTTTATTTCT	23728	CCTTTTATTTCT
102	rpoC1-intron 1	LSC	23966	CCAGTAC	23712	CCAGTAC	24107	CCAGTAT	23966	CCAGTAC	24010	CCAGTAC	23999	CCAGTAC	23959	CCAGTAC	23836	C
103	rpoC1-intron 1	LSC	24179	T	23925	T	24320	T	24179	T	24223	T	24212	TT	24172	T	24043	T
104	rpoC1-intron 1	LSC	24208	CT	23954	CT	24349	C	24208	CT	24252	CT	24242	CT	24201	CT	24072	CTT
105	IGS (rpoB, trnC-GCA)	LSC	28203	C	27949	C	28343	C	28203	C	28247	C	28237	C	28196	CATAT	28068	C
106	IGS (rpoB, trnC-GCA)	LSC	28262	ATTGGAAT	28008	ATTGGAAT	28402	ATTGGAAT	28262	ATTGGAAT	28306	ATTGGAAT	28296	ATTGGAAT	28259	ATTGGAAT	28127	A
107	IGS (rpoB, trnC-GCA)	LSC	28282	CAAATG	28028	CAAATA	28422	CAAATG	28282	CAAATG	28326	CAAATA	28316	CAAATG	28279	CAAATG	28140	C
108	IGS (rpoB, trnC-GCA)	LSC	28309	C	28055	CTTAGACTTAT	28449	C	28309	C	28353	CTTAGACTTAT	28343	CTTAGACTTAT	28306	C	28162	C
109	IGS (rpoB, trnC-GCA)	LSC	28339	TA	28095	TA	28479	TA	28339	T	28393	TA	28383	T	28336	TA	28192	T
110	IGS (rpoB, trnC-GCA)	LSC	28469	AAAGAATATAGAATTCATT	28225	AAAGAATATAGAATTCATT	28609	AAAGAATATAGAATTCATT	28469	AAAGAATATAGAATTCATT	28523	AAAGAATATAGAATTCATT	28512	AAAGAATATAGAATTCAT	28466	A	28321	AAAGAATATAGAATTCATTTT
111	IGS (rpoB, trnC-GCA)	LSC	28571	GTAGAATTCA	28327	GTAGAATTCA	28711	GTAGAATTCA	28571	GTAGAATTCA	28625	GTAGAATTCA	28613	GTAGAATTCA	28550	GTAGAATTCA	28425	G
112	IGS (rpoB, trnC-GCA)	LSC	28783	CTATGTAAAAATGTC	28539	CT	28923	CT	28783	CTATGTAAAAATGTC	28837	C	28825	CT	28762	CCCCTATGTGTAAAAATGTC	28628	CTACTACCTAATATCTGTGTAAAAATGTC
113	IGS (rpoB, trnC-GCA)	LSC	29073	CT	28816	CTT	29200	CTTT	29073	CT	29113	CTT	29102	CTTTT	29057	CT	28932	C
114	trnC-GCA	LSC	29184	CG	28928	CG	29313	CG	29184	CG	29225	CG	29216	CG	29168	CG	29042	C
115	IGS (trnC-GCA, petN)	LSC	29301	GGGAAA	29045	GGGAAA	29430	GGGAAA	29301	GGGAAA	29342	GGGAAA	29333	AGGGAA	29285	GGGAAA	29158	G
116	IGS (trnC-GCA, petN)	LSC	29444	TCTTGAA	29188	T	29573	TCTTGAA	29444	TCTTGAA	29485	TCTTGAA	29476	TCTTGAA	29428	TCTTGAA	29296	TCTTGAA
117	IGS (trnC-GCA, petN)	LSC	29572	CT	29310	CTTT	29701	CTTT	29572	CT	29613	CT	29604	C	29556	C	29424	C
118	IGS (trnC-GCA, petN)	LSC	29580	T	29320	TT	29711	TT	29580	TC	29621	TT	29611	TT	29563	TT	29431	TT
119	IGS (trnC-GCA, petN)	LSC	29781	CA	29522	CA	29913	CA	29781	CA	29823	CA	29813	CA	29765	C	29633	CA
120	IGS (trnC-GCA, petN)	LSC	29964	AT	29705	AT	30096	AT	29964	AT	30006	AT	29996	AT	29947	AT	29816	A
121	IGS (petN, psbM)	LSC	30381	G	30122	G	30513	G	30381	G	30423	G	30413	G	30364	GA	30232	G
122	IGS (petN, psbM)	LSC	30401	TC	30142	TC	30533	TC	30401	TC	30443	TC	30433	TC	30385	TA	30252	T
123	IGS (petN, psbM)	LSC	30527	TATTAAAT	30268	GATTAAAT	30659	GATTAAAT	30527	GATTAAAT	30569	GATTAAAT	30559	GATTAAAT	30511	GATTAAATATTAAA	30377	G
124	IGS (petN, psbM)	LSC	30845	AAT	30586	AG	30977	AAG	30845	AG	30887	AAGATTA	30877	AAG	30835	AAGG	30688	AG
125	IGS (petN, psbM)	LSC	30884	CT	30624	CT	31016	C	30884	CT	30930	CT	30916	CT	30875	CT	30726	CT
126	IGS (petN, psbM)	LSC	31299	TTAA	31038	TTGA	31430	TTGA	31299	TTAA	31345	TTGA	31331	TTGA	31001	TTGA	31133	T
127	IGS (psbM, trnD-GUC)	LSC	31472	TT	31211	TTT	31603	T	31472	TT	31518	TTTT	31504	TT	31174	TTTTT	31303	TTTTTT
128	IGS (psbM, trnD-GUC)	LSC	31736	TC	31476	TC	31866	TC	31736	TC	31784	TC	31768	TC	31441	TC	31571	T
129	IGS (psbM, trnD-GUC)	LSC	31897	T	31637	T	32027	T	31897	T	31945	T	31929	T	31602	TCTTGTT	31731	T
130	IGS (psbM, trnD-GUC)	LSC	32004	C	31744	C	32134	C	32004	C	32052	C	32036	C	31715	CCTTAG	31838	C
131	IGS (psbM, trnD-GUC)	LSC	32061	ATCTTTCTTTTATTAATATCC	31801	ATCTTTCTTTTATTAATATCC	32191	ATCTTTCTTTTATTAATATCC	32061	ATCTTTCTTTTATTAATATCC	32109	ATCTTTCTTTTATTAATATCC	32093	ATCTTTCTTTTATTAATATCC	31777	A	31895	ATCTTTCTTTTATTAATATCC
132	IGS (psbM, trnD-GUC)	LSC	32173	A	31913	A	32303	A	32173	A	32221	A	32205	A	31869	A	32007	AT
133	IGS (psbM, trnD-GUC)	LSC	32233	GCCGGGT	31973	GCCGGGT	32363	GCCGGGT	32233	GCCGGGT	32281	GCCGGGT	32265	GCCGGGT	31929	GCCGGGT	32068	G
134	IGS (psbM, trnD-GUC)	LSC	32493	AAATGCGAAAA	32233	AAATGCGA	32623	AAATGCGAA	32493	AAATGCGAAAA	32541	AAATGCAAAAAG	32525	A	32189	AAATGTGAAAAGA	32322	AAATGCGAA
135	IGS (psbM, trnD-GUC)	LSC	32504	GA	32241	AA	32632	AA	32504	G	32553	AA	32526	AA	32202	AA	32331	AA
136	IGS (psbM, trnD-GUC)	LSC	32595	GGTGAAT	32332	G	32723	GATGAAT	32595	GATGAAT	32644	GATGAAT	32617	GATGAAT	32293	GATGAAT	32422	GATGAAT
137	IGS (trnD-GUC, trnY-GUA)	LSC	32713	A	32444	A	32841	A	32713	A	32762	A	32735	A	32411	A	32540	AG
138	IGS (trnD-GUC, trnY-GUA)	LSC	32894	CTTAGACTTTATACTTATGATCCTGATATGAATCTAGATCA	32625	C	32954	C	32894	CTTAGACTTTATACTTATGGATCCTGATATGAATCTAGATCA	32943	C	32916	C	32592	CTTATACTTATGGATCCTGATATGAATCTAGATCA	32722	CTTAGACTTTATACTTATGGATCCTGATATGAATCTAGATCA
139	IGS (trnD-GUC, trnY-GUA)	LSC	32968	GAAAACAAAT	32659	GAAAACAAAT	32988	GAAAACAAAT	32968	GAAAACAAAT	32977	GAAAACAAAT	32950	G	32660	GAAAACAAAT	32797	GAAAACAAAT
140	IGS (trnD-GUC, trnY-GUA)	LSC	33005	GAAAGTTCTATTTTTGCTATTCTT	32696	GAAAGTTCTATTTTTGCTATTCTT	33025	GAACGTTCTATTTTTGCTATTCTT	33005	GAAAGTTCTATTTTTACTATTCTT	33014	GAAAGTTCTATTTTTGCTATTCTT	32978	GAAAGTTCCATTTTTGCTATTCTT	32697	G	32834	GAAAGTTCTATTTTTGCTATTCTT
141	IGS (trnE-UUC, trnT-GGU)	LSC	33419	C	33110	C	33439	C	33419	C	33428	C	33392	CAG	33088	C	33248	C
142	IGS (trnE-UUC, trnT-GGU)	LSC	33452	C	33143	T	33472	C	33452	C	33461	C	33427	C	33121	CATTTC	33281	C
143	IGS (trnE-UUC, trnT-GGU)	LSC	33485	T	33176	T	33505	T	33485	TATAATTTA	33494	T	33460	T	33159	T	33314	TATAATTTA
144	IGS (trnE-UUC, trnT-GGU)	LSC	33504	A	33195	AT	33524	A	33504	A	33513	A	33479	A	33178	A	33341	A
145	IGS (trnE-UUC, trnT-GGU)	LSC	33543	ATCCATTATCTATTTGAT	33235	A	33563	ATCCATTATCTATTCGAT	33543	ATCCATTATCTATTCGAT	33552	ATCCATTATCTATTCGAT	33518	ATCCATTATCTATTCGAT	33217	ATCCATTATCTATTCGAT	33380	ATCCATTATCTATTCGAT
146	IGS (trnE-UUC, trnT-GGU)	LSC	33634	GTATATAG	33309	G	33654	G	33634	G	33643	G	33609	G	33308	G	33471	G
147	IGS (trnE-UUC, trnT-GGU)	LSC	33644	TA	33312	TA	33657	TA	33644	TA	33646	TAAA	33612	TA	33311	T	33474	TA
148	IGS (trnE-UUC, trnT-GGU)	LSC	33689	TC	33357	TC	33702	TC	33689	TC	33693	TC	33657	TC	33355	TC	33519	T
149	IGS (trnT-GGU, psbD)	LSC	33958	TA	33626	TA	33971	TA	33958	TA	33962	TA	33926	TA	33624	T	33787	T
150	IGS (trnT-GGU, psbD)	LSC	34011	AATTAT	33679	AATTAT	34024	AATTAT	34011	GATTAT	34015	AATTAT	33979	AATTAT	33676	A	33839	AATTAT
151	IGS (trnT-GGU, psbD)	LSC	34065	A	33733	ATAATGAGAATGAG	34078	ATAATGAGAATGAG	34065	ATAATGAGAATGAG	34069	ATAATGAGAATGAG	34033	ATAATGAGAATGAG	33725	ATCATGAGAATGAG	33893	ATAATGAGAATAATGATAAGCTA
152	IGS (trnT-GGU, psbD)	LSC	34254	C	33935	C	34280	CT	34254	C	34271	C	34235	C	33927	C	34104	C
153	IGS (trnT-GGU, psbD)	LSC	34459	GATAT	34140	GAT	34486	GAT	34459	GATATAT	34476	GAT	34440	GAT	34132	G	34309	GAT
154	IGS (trnT-GGU, psbD)	LSC	34535	C	34214	C	34560	CAATGTGACGGAG	34535	C	34550	C	34514	C	34204	C	34383	C
155	IGS (trnT-GGU, psbD)	LSC	34582	TCCTATTA	34261	T	34619	T	34582	TCCTATTA	34597	T	34561	T	34251	T	34430	T
156	IGS (trnT-GGU, psbD)	LSC	34613	A	34285	A	34643	A	34613	A	34621	A	34585	ATTAAAGTAAAAACT	34275	A	34454	A
157	IGS (trnT-GGU, psbD)	LSC	34716	ATACTCTGTAGTTTTAGATTCAT	34388	A	34746	ATACTCTGTAGTTTTAGATTCAT	34716	ATACTCTGTAGTTTTAGATTCAT	34724	ATACTCTGTAGTTTTAGATTCAT	34702	ATACTCTGTAGTTTTAGATTCAT	34378	ATACTCTGTAGTTTTAGATTAAT	34557	ATACTTTGTAGTTTTAGATTCAT
158	IGS (trnT-GGU, psbD)	LSC	34757	AAAAAAAAAGCCAATAAAATAAAAAAGGG	34407	TAAAAAAAAGCCAATAAAATAAAAAAAAAAG	34787	TAAAAAAAAAGCCAATAAAATAAAAAG	34757	TAAAAAAAAGCCAATAAAATAAAAAAAGG	34765	TAAAAAAAAAAAGCCAATAAAATAAAAAAAAG	34743	TAAAAAAAAAAAGCCAATAAAAG	34419	TAAAAAAAACCAATAAAAAAAAG	34598	TAAAAAAAAG
159	IGS (trnT-GGU, psbD)	LSC	35005	AGTTTAT	34657	AGTTTAT	35033	AGTTTAT	35005	AGTTTAT	35016	AGTTTAT	34985	A	34661	AGTTTAT	34827	AGTTTAT
160	IGS (trnT-GGU, psbD)	LSC	35050	CG	34702	CG	35078	CG	35050	CG	35061	CG	35024	CG	34706	CG	34872	C
161	IGS (psbC, trnS-UGA)	LSC	37687	C	37339	CTTT	37715	CT	37687	CT	37698	CTT	37661	CT	37343	CT	37508	CTT
162	IGS (psbC, trnS-UGA)	LSC	37806	CAAAA	37461	C	37835	C	37806	C	37819	C	37781	C	37463	C	37629	C
163	IGS (trnS-UGA, psbZ)	LSC	37924	TTA	37575	TTA	37949	TTA	37924	T	37933	TTA	37895	TTA	37577	TTA	37743	TTA
164	IGS (trnS-UGA, psbZ)	LSC	38071	T	37722	TA	38096	TAAA	38071	TA	38080	TA	38042	TA	37724	TA	37890	TAAAAA
165	IGS (trnS-UGA, psbZ)	LSC	38112	T	37764	TA	38140	T	38112	T	38122	TA	38084	T	37766	T	37936	TA
166	IGS (trnS-UGA, psbZ)	LSC	38200	T	37853	T	38228	TAG	38200	T	38211	T	38172	T	37854	T	38025	TAGA
167	IGS (psbZ, trnG-UCC)	LSC	38475	C	38128	C	38505	C	38475	C	38486	C	38447	C	38129	C	38303	CCCC
168	IGS (psbZ, trnG-UCC)	LSC	38609	AAAAGAAT	38262	AAAAGAAT	38639	A	38609	AAAAGAAT	38620	AAAAGAAT	38581	AAAAGAAT	38263	AAAAGAAT	38440	AAAAGAAT
169	IGS (psbZ, trnG-UCC)	LSC	38641	A	38294	A	38664	A	38641	A	38652	A	38613	A	38295	AT	38472	A
170	IGS (psbZ, trnG-UCC)	LSC	38660	ATTAAACTA	38313	ATTAAACTA	38683	A	38660	ATTAAACTA	38671	ATTAAACTG	38632	A	38315	ATTAAACTA	38491	A
171	IGS (psbZ, trnG-UCC)	LSC	38673	TATAATTAAATATTTTG	38326	TATAATTAAATATTTTG	38688	TATAACTAAATATTTTG	38673	TATAATTCAATATTTTG	38684	TATAATTAAATATTTTG	38637	TATAATTAAATATTTTG	38328	T	38496	TATAATTAAATATTTTATATTACTTAT
172	IGS (psbZ, trnG-UCC)	LSC	38835	TATCTAATAATATA	38488	TATCTAATAATATA	38850	T	38835	TATCTAATAAATAATAAATATA	38846	TATCTAATAATATA	38799	TATCTAATAATATA	38474	TATCTAATAATA	38668	GATATAATAATCTA
173	IGS (psbZ, trnG-UCC)	LSC	38857	T	38510	TTATTA	38859	TTATA	38857	T	38868	TTATTA	38821	TTATTA	38494	T	38690	T
174	IGS (psbZ, trnG-UCC)	LSC	38868	TATATTTCTTATATA	38526	T	38874	T	38868	T	38884	T	38837	A	38505	T	38701	T
175	IGS (psbZ, trnG-UCC)	LSC	38904	T	38548	T	38896	T	38904	T	38906	T	38859	TTATAGA	38527	T	38723	T
176	IGS (psbZ, trnG-UCC)	LSC	38988	CATAT	38632	C	38980	C	38988	C	38990	C	38949	C	38611	C	38807	C
177	IGS (psbZ, trnG-UCC)	LSC	39031	A	38671	T	39019	A	39031	A	39029	T	38988	T	38650	AAAA	38846	AAA
178	IGS (trnG-UCC, trnfM-CAU)	LSC	39179	CCCTTCTTTT	38819	C	39167	CCCTTCTTTT	39179	CCCTTCTTTT	39177	CCCTTCTTTT	39136	CCCTTCTTTT	38801	CCCTTCTTTT	38996	CCCTTCTTTT
179	IGS (trnG-UCC, trnfM-CAU)	LSC	39189	C	38820	CCTTTCA	39177	CCTTTCA	39189	CCTTTCA	39187	CCTTTCA	39146	CCTTTCA	38811	CCTTTCA	39006	CCTTTCA
180	IGS (trnG-UCC, trnfM-CAU)	LSC	39201	A	38838	A	39195	A	39201	AAATAGTCATTAATT	39205	A	39164	A	38829	A	39024	A
181	IGS (trnG-UCC, trnfM-CAU)	LSC	39250	CTT	38887	CTT	39244	CTT	39250	CCT	39254	CTT	39213	C	38878	CTT	39073	CTT
182	IGS (trnfM-CAU, rps14)	LSC	39474	AATAAAT	39111	AATAAAT	39468	AATAAAT	39474	AATAAAT	39478	A	39435	A	39102	AATAAAT	39297	AATAAAT
183	IGS (rps14, psaB)	LSC	39845	G	39482	G	39839	G	39845	G	39843	G	39800	G	39473	GTC	39668	G
184	IGS (rps14, psaB)	LSC	39927	AAATAAAAA	39564	AAATAAA	39921	AATTAAATAAAAA	39927	AAATAAAAA	39925	AAATAAAAAAAAA	39882	AAAT	39557	AAAAAA	39750	AAATAAAA
185	IGS (rps14, psaB)	LSC	39936	AAT	39571	AAA	39934	AAA	39936	A	39938	AAA	39886	AAA	39563	AAA	39758	AAA
186	IGS (psaA, ycf3)	LSC	44694	A	44329	AT	44692	CT	44694	AT	44696	AT	44644	ATT	44321	AT	44516	ATT
187	IGS (psaA, ycf3)	LSC	44770	GTCTTACA	44406	G	44769	G	44770	G	44773	G	44722	G	44398	G	44594	G
188	IGS (psaA, ycf3)	LSC	44792	TATTGC	44421	T	44784	T	44792	TATTGC	44788	T	44737	T	44413	TATTGC	44609	TATTGT
189	IGS (psaA, ycf3)	LSC	44817	A	44441	A	44804	A	44817	A	44808	A	44757	A	44438	ATTACT	44634	A
190	IGS (psaA, ycf3)	LSC	44861	TAGTTTTA	44485	TAGTTTTA	44848	TAGTTTTA	44861	TAGTTTTA	44852	T	44801	TAGTATTAGTTTTA	44487	TAGTTTTA	44678	TAGTTTTA
191	IGS (psaA, ycf3)	LSC	44893	ATATATTTT	44517	A	44880	ATATATTTTTT	44893	ATAT	44877	ATATATTT	44839	ATATA	44519	ATATATATTTTTT	44710	ATATTTTT
192	IGS (psaA, ycf3)	LSC	44909	ACTGTAT	44525	ACTGTAT	44898	ACTGTAT	44909	ACTGTAT	44892	ACTGTAT	44851	ACTGTAT	44539	A	44725	ACTGTATCTGTATT
193	ycf3-intron 2	LSC	45391	AT	45007	A	45380	ATT	45391	AT	45374	A	45333	AT	45015	AT	45214	AT
194	ycf3-intron 2	LSC	45691	CTTGTT	45306	CTTGTT	45681	C	45691	CTTGTT	45673	CTTGTT	45633	CTTGTT	45315	CTTGTT	45514	CTTGTT
195	ycf3-intron 2	LSC	45740	C	45355	C	45725	C	45740	C	45722	C	45682	C	45364	C	45563	CA
196	ycf3-intron 1	LSC	46300	G	45915	G	46285	G	46300	G	46282	G	46242	G	45924	GTGCATAA	46124	G
197	ycf3-intron 1	LSC	46817	TC	46432	TC	46802	TC	46817	TC	46799	TC	46759	TC	46448	TC	46641	T
198	ycf3-intron 1	LSC	46912	T	46527	T	46897	T	46912	TAAATAAAGTGAT	46894	T	46854	T	46543	T	46735	TA
199	IGS (ycf3, trnS-GGA)	LSC	47164	CA	46779	CA	47149	CAAA	47164	CA	47146	CA	47106	CA	46795	C	46988	C
200	IGS (ycf3, trnS-GGA)	LSC	47188	CTCAAATTATTTCTTAGGAATCCAT	46803	CTCAAATTATTTCTTAGGAATCCAT	47175	CTCAAATTATTTCTTAGGAATCCAT	47188	CTCAAATTATTTCTTAGGAATCCAT	47170	CTCAAATTATTTCTTAGGAATCCAT	47130	CTCAAATTATTTCTTAGGAATCCAT	46818	C	47011	CTCACTACTCAAATTATTTCTTAGGAATCCAT
201	IGS (ycf3, trnS-GGA)	LSC	47567	G	47182	G	47554	G	47567	G	47549	G	47509	G	47111	G	47397	GA
202	IGS (ycf3, trnS-GGA)	LSC	47632	GATTTA	47247	GATTTA	47619	GAATTA	47632	G	47614	GATTTA	47574	GATTTA	47176	G	47463	GAATTA
203	IGS (ycf3, trnS-GGA)	LSC	47653	TAAATATAAG	47268	TAAATATAAG	47640	T	47653	TAAATATAAG	47635	TAAATATAAG	47595	TAAATATAAG	47192	TAAATATAAG	47484	TAAATATCAG
204	IGS (ycf3, trnS-GGA)	LSC	47705	T	47320	T	47683	TCTTTA	47705	T	47687	T	47647	T	47244	T	47536	T
205	IGS (ycf3, trnS-GGA)	LSC	47731	C	47346	C	47714	C	47731	CA	47713	C	47673	CA	47270	CA	47562	CAA
206	IGS (ycf3, trnS-GGA)	LSC	47753	CCTAAGCCG	47368	CCTAAGCCG	47736	C	47753	CCTAAGCCG	47735	CCTAAGCCG	47696	CCTAAGCCG	47293	CCTAAGCCG	47586	CCTAAGCCG
207	IGS (trnS-GGA, rps4)	LSC	48046	TATTCCAAC	47661	TATTCCAAC	48021	TATTCCAAC	48046	TATTCCAAC	48028	TATTCCAAC	47989	TATTCCAAC	47586	TATTCCAAC	47879	T
208	IGS (trnS-GGA, rps4)	LSC	48096	CTGTGG	47711	CTGTGG	48071	CTGTGG	48096	C	48078	CTGTGG	48039	CTGTGG	47636	CTGTGG	47921	CTGTGG
209	IGS (trnS-GGA, rps4)	LSC	48194	CTTTTT	47809	CCCTTTT	48169	CCCTTTT	48194	CTTTT	48176	CCCTTT	48137	CCCCTTTTTT	47734	CCCTTTTTT	48019	CTT
210	IGS (rps4, trnT-UGU)	LSC	49072	ACCCTTGGAAAAGGGGAGGAAGCCCTTTCAA	48688	ACCCTTGGAAAAGGGGAGGAAGCCCTTTCCA	49048	ACCCTTTCAA	49072	ACCCTTGGAAAAGGGGAGGAAGCCCTTTCAA	49054	ACCCTTGGAAAAGGGGAGGAAGCCCTTTCAA	49019	ACCCTTTCAA	48615	ACCC	48894	ACCCTTGGAAAAGGGGAGGAAGCCCTTTCAA
211	IGS (trnT-UGU, trnL-UAA)	LSC	49421	A	49037	AT	49376	A	49421	A	49403	A	49347	A	48937	A	49243	A
212	IGS (trnT-UGU, trnL-UAA)	LSC	49492	TG	49109	TT	49447	TT	49492	T	49474	TT	49418	TT	49008	TT	49314	TT
213	IGS (trnT-UGU, trnL-UAA)	LSC	49502	T	49119	T	49457	TTATCAATT	49502	T	49484	T	49428	TTATCAA	49018	T	49324	T
214	IGS (trnT-UGU, trnL-UAA)	LSC	49664	ATATATTTGTATAAAAAGGTTGATATATATTTATAAACTTATT	49281	ATATATTTGTATAAAAAAGTTGATATATATTTATAAACTTATT	49627	ATCTATTTGTATAAAAAAGTTGATATATATTTATAAACTTATT	49664	ATATATTTGTATAAAAAAGTTGATATATATTTATAAACTTATT	49646	ATATATTTGTATAAAAAAGTTGATATATATTTATAAACTTATT	49596	A	49180	ATATATTTGTATAAAAAAGTTGATATATATTTATAAACTTATT	49486	ATTTTTTTATAAAAAGTTGATATATATTTATAAACTTATT
215	IGS (trnT-UGU, trnL-UAA)	LSC	49742	A	49359	A	49705	A	49742	A	49724	A	49632	A	49258	A	49561	ATATT
216	IGS (trnT-UGU, trnL-UAA)	LSC	49753	T	49370	TTAATTATCTAGA	49716	T	49753	T	49735	TTAATTATCTAGA	49643	T	49269	T	49576	T
217	IGS (trnT-UGU, trnL-UAA)	LSC	49764	G	49393	G	49727	G	49764	G	49758	G	49654	G	49280	G	49587	GATAAAATAGATATTATCTAATATAT
218	IGS (trnT-UGU, trnL-UAA)	LSC	49817	A	49446	A	49780	A	49817	A	49811	A	49707	A	49333	A	49665	ATGATTAGGTATAGCAATTGTATTAATTATAAATATTAT
219	IGS (trnT-UGU, trnL-UAA)	LSC	50006	CA	49635	CA	49969	CA	50006	CA	50000	CA	49896	CA	49522	CA	49892	C
220	IGS (trnT-UGU, trnL-UAA)	LSC	50243	C	49872	C	50206	CA	50243	C	50237	C	50133	C	49759	C	50128	C
221	trnL-UAA-intron 1	LSC	50474	G	50103	GAGAATC	50438	GAGAATC	50474	G	50468	GAGAATC	50364	GAGAATC	49990	GAGAATC	50359	GAGAATC
222	trnL-UAA-intron 1	LSC	50561	CATAGAAA	50196	CATCGAAA	50531	CATCGAAA	50561	CATCGAAA	50561	CATCGAAA	50457	C	50083	CATCGAAA	50452	CATCGAAA
223	trnL-UAA-exon 2	LSC	50897	CA	50532	CA	50867	CA	50897	CA	50897	CA	50786	C	50419	CA	50788	CA
224	IGS (trnL-UAA, trnF-GAA)	LSC	50946	C	50581	C	50916	C	50946	C	50946	C	50834	C	50468	C	50837	CTCTTT
225	IGS (trnL-UAA, trnF-GAA)	LSC	51061	CATCTTTAA	50696	C	51031	CATCTTTAA	51061	CATCTTTAA	51061	CATCTTTAA	50949	CATCTTTAA	50583	CATCTTTAA	50957	CATCTTTAA
226	IGS (trnL-UAA, trnF-GAA)	LSC	51167	T	50794	T	51137	T	51167	T	51167	T	51055	TA	50689	T	51063	T
227	IGS (trnF-GAA, ndhJ)	LSC	51478	CTT	51105	CT	51448	CTT	51478	CTT	51478	CT	51367	C	51000	C	51374	CTT
228	IGS (trnF-GAA, ndhJ)	LSC	51486	T	51112	TT	51456	TT	51486	TT	51485	TT	51373	TT	51006	TT	51382	TT
229	IGS (trnF-GAA, ndhJ)	LSC	51514	AAAAG	51141	AAAAG	51485	AAAAG	51514	AAAAG	51514	AAAAG	51402	A	51035	AAAAG	51411	AAAAG
230	IGS (trnF-GAA, ndhJ)	LSC	51607	ACAGTA	51234	ACAGTA	51578	ACAGTA	51607	ACAGTA	51607	ACAGTA	51491	ACAGTA	51128	ACAGTA	51504	A
231	IGS (trnF-GAA, ndhJ)	LSC	51631	CTTTCAT	51258	CTTTCAT	51602	CTTTCAT	51631	CTTTCAT	51631	C	51515	CTTTCAT	51152	CTTTCAT	51523	CTTTCAT
232	IGS (trnF-GAA, ndhJ)	LSC	51672	C	51299	CATTCCCTCCTACGTAACTTTCTAG	51643	CATTCCCTCCTACGTAACTCCCTAG	51672	C	51666	CATTCCCTCCTACGTAACTTTCTAG	51556	CATTCCCTCCTACGTAACTTTCTAG	51193	CATTCCCTCCTACGTAACTTTCTAG	51564	CATTCCCTCCTACGTAACTTTCTAG
233	IGS (trnF-GAA, ndhJ)	LSC	51766	C	51417	C	51761	C	51766	C	51784	CT	51674	C	51311	C	51682	C
234	IGS (trnF-GAA, ndhJ)	LSC	51923	AATTGTT	51574	AATTGTT	51918	AATTATT	51923	AATTGTT	51942	AATTGTT	51831	AATTGTT	51468	AATTGTT	51839	A
235	IGS (ndhJ, ndhK)	LSC	52503	CCGCTG	52154	CCGCTG	52498	CCGCTG	52503	CCGCTG	52522	CCGCTG	52411	C	52048	CCGCTG	52413	CTCCTG
236	IGS (ndhC, trnV-UAC)	LSC	53652	CTAATGAA	53303	C	53647	CTAATGAA	53652	CTAATGAA	53671	CTAATGAA	53555	CTAATGAA	53197	CTAATGAA	53562	CTAATGAA
237	IGS (ndhC, trnV-UAC)	LSC	53722	AACAAC	53366	AACAAC	53717	AACAAC	53722	AACAAC	53741	AACAAC	53625	AACAAC	53267	AACAAC	53632	A
238	IGS (ndhC, trnV-UAC)	LSC	53865	CAA	53509	CAAAAA	53860	CA	53865	AAA	53884	CA	53768	CA	53410	C	53770	CAAA
239	IGS (ndhC, trnV-UAC)	LSC	53951	CGAATTCTATATTT	53598	C	53945	C	53951	CGAATTCTATATTT	53969	C	53853	C	53494	CTAATTCTATATTT	53857	CTAATTCTCTATTT
240	IGS (ndhC, trnV-UAC)	LSC	54041	CT	53675	CT	54022	CT	54041	C	54046	CT	53930	CT	53584	CTT	53947	CT
241	IGS (ndhC, trnV-UAC)	LSC	54200	C	53834	C	54181	C	54200	C	54205	TA	54089	C	53744	C	54106	C
242	IGS (ndhC, trnV-UAC)	LSC	54243	AT	53877	AT	54224	A	54243	AT	54249	AT	54132	AT	53787	AT	54149	AT
243	IGS (ndhC, trnV-UAC)	LSC	54470	AACAAT	54104	AACAAT	54451	AACAAT	54470	A	54476	AACAAT	54358	AACAAT	54010	AACAAT	54194	AACAAT
244	IGS (ndhC, trnV-UAC)	LSC	54525	A	54159	ATTTCATT	54506	ATTTCATT	54525	A	54531	ATTTCATT	54413	ATTTCATT	54065	ATTTCATT	54249	ATTTCATT
245	trnV-UAC-intron 1	LSC	54630	ATT	54271	ATTT	54618	A	54630	ATT	54643	ATTT	54525	AT	54177	ATTTTTT	54361	ATTT
246	trnV-UAC-intron 1	LSC	54909	ATT	54551	ATTTT	54895	ATT	54909	A	54923	AT	54803	A	54460	AT	54641	ATTT
247	IGS (trnV-UAC, trnM-CAU)	LSC	55175	T	54819	T	55161	T	55175	T	55188	T	55067	T	54725	T	54908	TA
248	IGS (trnV-UAC, trnM-CAU)	LSC	55247	AGCTTTTTGA	54891	AGCTTTTTGA	55233	AGCTTTTTGA	55247	AGCTTTTTTA	55260	AGCTTTTTGA	55139	AGC	54797	A	54981	AGCTTTTTGA
249	IGS (trnV-UAC, trnM-CAU)	LSC	55312	A	54956	A	55298	A	55312	A	55325	A	55197	A	54853	A	55046	AT
250	IGS (trnM-CAU, atpE)	LSC	55434	A	55078	A	55420	A	55434	A	55447	A	55319	ATGGTATC	54975	C	55169	C
251	IGS (trnM-CAU, atpE)	LSC	55578	T	55222	T	55564	T	55578	TGCAC	55591	T	55470	T	55119	T	55313	T
252	IGS (atpB, rbcL)	LSC	57635	T	57279	TTA	57621	T	57635	T	57648	T	57527	T	57176	T	57370	T
253	IGS (atpB, rbcL)	LSC	57983	CAAAAAA	57629	CAAAAAAA	57969	CAAA	57983	CAAAA	57996	CAAAA	57875	C	57524	CAA	57718	CAA
254	IGS (atpB, rbcL)	LSC	58004	G	57651	GGAT	57987	G	58004	G	58015	G	57890	G	57541	G	57735	G
255	IGS (rbcL, accD)	LSC	59843	A	59493	ATACAA	59826	ATACAA	59843	ATACAA	59854	ATACAA	59729	ATACAA	59380	A	59574	ATACAA
256	IGS (rbcL, accD)	LSC	60039	AAG	59694	AAA	60027	AAG	60039	AAG	60055	AAG	59930	AAG	59576	A	59775	AAG
257	IGS (rbcL, accD)	LSC	60053	AT	59708	A	60041	AT	60053	AT	60069	AT	59944	A	59588	AT	59789	AT
258	IGS (rbcL, accD)	LSC	60067	AAATTTGACACGACATCGGAG	59721	AAATTTGACACGACATGGGAG	60055	AAATTTGACATGCCATGGGAG	60067	AAATTTGACACGACATGGGAG	60083	AAATTTGACACGACATGGGAG	59957	AAATTTGACACGACATGGGAG	59602	AAATTTGACACGACATGGGAG	59803	A
259	IGS (rbcL, accD)	LSC	60195	G	59849	GTTATTA	60183	G	60195	G	60211	G	60085	G	59730	G	59911	G
260	accD	LSC	60746	CGTGTAT	60406	CGTGTAT	60734	CGTGTAT	60746	CGTGTAT	60762	CGTGTAT	60636	C	60281	CGTGTAT	60462	CGTGTAT
261	IGS (accD, psaI)	LSC	61876	GT	61536	GT	61864	GT	61876	GT	61892	GT	61760	G	61411	GT	61592	GT
262	IGS (accD, psaI)	LSC	61931	CTCTTTTTTTTTTTGGAGA	61591	CTCTTTTTTCTTTTTTTGGAGATC	61919	CTCTTTTTTATTTTTTTGGAGA	61931	CTCTTTTTTTTTTGGAGA	61947	CTCTTTTTTATTTTTTGGAGATCT	61814	CTCTTTTTTATTTTTTTGGAGA	61466	C	61647	CTCTTTTTTATTTTTTTGGAGA
263	IGS (accD, psaI)	LSC	61963	C	61628	C	61954	C	61963	C	61984	C	61849	C	61480	C	61682	CCATATT
264	IGS (accD, psaI)	LSC	62075	CGTATG	61740	CGTATG	62066	CGTATG	62075	CGTATG	62096	CGTATG	61961	CGTATG	61592	C	61800	CGTATG
265	IGS (accD, psaI)	LSC	62220	CAATTCAA	61885	CAATTCAA	62211	CAATTCAA	62220	CAATTCAA	62241	CAATTCAA	62106	CA	61732	C	61945	C
266	IGS (accD, psaI)	LSC	62312	A	61977	AAGTCC	62303	AAGTCC	62312	AAGTCC	62333	AAGTCC	62192	AAGTCC	61817	AAGTCC	62030	AAGTCC
267	IGS (psaI, ycf4)	LSC	62608	GTT	62278	GT	62604	GTT	62608	GTTTT	62634	G	62493	GTTTT	62118	GTTT	62331	GTT
268	IGS (psaI, ycf4)	LSC	62814	T	62483	T	62810	TGGGTGTAG	62814	T	62838	T	62701	T	62325	T	62537	T
269	IGS (ycf4, cemA)	LSC	63569	GAA	63238	GAA	63573	GA	63569	GAA	63593	GAA	63456	GAA	63080	GAA	63292	G
270	IGS (ycf4, cemA)	LSC	63595	G	63264	G	63598	G	63595	G	63619	G	63482	GA	63106	G	63316	G
271	IGS (ycf4, cemA)	LSC	63612	TA	63281	TC	63615	TC	63612	TC	63636	TC	63500	T	63123	TC	63333	TC
272	IGS (ycf4, cemA)	LSC	63663	AACAGATGTATAT	63332	AACAGATGTATAT	63666	AACAGATGTATAT	63663	AACAGATGTATAT	63687	AACAGATGTATAT	63550	A	63174	AACAGATGTATAT	63384	AACAGATGTATAT
273	IGS (ycf4, cemA)	LSC	63692	CAAAACT	63361	CGAAACT	63695	TGAAACT	63692	CGAAACT	63716	CGAAACT	63567	TGAAACT	63203	C	63413	TGAAACT
274	IGS (ycf4, cemA)	LSC	63929	T	63598	TT	63932	TG	63929	TG	63953	TG	63804	TT	63434	TT	63650	TG
275	IGS (ycf4, cemA)	LSC	64143	GAAA	63813	GAAAAAA	64147	G	64143	GAAAA	64168	GAA	64019	GAA	63649	GAAAAA	63865	GAAA
276	IGS (cemA, petA)	LSC	64858	A	64531	A	64859	A	64858	A	64882	A	64733	A	64366	A	64580	ATATTAACCCAATTATAAT
277	IGS (cemA, petA)	LSC	64949	T	64622	TT	64950	TT	64949	TT	64973	TT	64824	TT	64457	TT	64689	TT
278	IGS (cemA, petA)	LSC	64958	TTTCAGTAAACTTAT	64632	T	64960	TTTCAGTAAACTTAT	64958	TTTCAGTAAACTTAT	64983	T	64834	TTTCAGTAAACTTAT	64467	TTTCAGTAAACTTAT	64699	TTTCAGTAAACTTAT
279	IGS (petA, psbJ)	LSC	66110	CCTTTTTTCTATT	65770	CCTTTTGCTTGTTTCTATT	66112	CCTTTTGCTTGTTTCTATT	66110	C	66121	CCTTTTGCTTGTTTCTATT	65986	CCTTTTGCTTGTTTCTATT	65619	CCTTTTGCTTGTTTCTATT	65851	CCTTTTGCTTGTTTCTATT
280	IGS (petA, psbJ)	LSC	66213	CT	65879	CT	66221	C	66213	CT	66230	C	66095	CTTTT	65728	C	65960	C
281	IGS (petA, psbJ)	LSC	66286	ATAGTTTTC	65952	A	66293	ATAGTTTTC	66286	ATAGTTTTC	66302	A	66171	A	65800	A	66032	A
282	IGS (petA, psbJ)	LSC	66539	CTTTTT	66197	CT	66546	C	66539	CT	66547	C	66416	CTT	66045	CTT	66277	CTT
283	IGS (psbJ, psbL)	LSC	67318	ATTCTCT	66973	ATTCTCT	67320	A	67318	ATTCTCT	67321	ATTCTCT	67192	ATTCTCT	66821	ATTCTCT	66845	ATTCTCT
284	IGS (psbE, petL)	LSC	68415	AATAATAGTAAC	68071	AATAATAGTAAC	68397	AATAATAGTAAC	68415	AATAATAGTAAC	68418	AATAATAGTAAC	68291	AATAATAGTAAC	67920	A	67819	AATAATAGTAAC
285	IGS (psbE, petL)	LSC	68450	TTGTTGTA	68106	TTGTTGTA	68432	T	68450	TTGTTGTA	68453	TTGTTGTA	68326	TTGTTGTA	67944	TTGTTGTA	67854	TTGTTGTA
286	IGS (psbE, petL)	LSC	68518	C	68174	CAAA	68493	C	68518	C	68521	C	68394	C	68012	C	67922	C
287	IGS (psbE, petL)	LSC	68757	T	68416	TA	68732	T	68757	TA	68760	TA	68633	T	68251	TA	68161	T
288	IGS (petL, petG)	LSC	69393	CTT	69053	CTT	69368	CTTT	69393	CTT	69397	C	69269	CTT	68888	CT	68797	CTT
289	IGS (petG, trnW-CCA)	LSC	69550	CTT	69210	CTTTT	69526	C	69550	CT	69552	CT	69426	CT	69044	CTTT	68954	C
290	IGS (petG, trnW-CCA)	LSC	69644	T	69306	T	69618	T	69644	T	69645	T	69519	T	69139	T	69046	TTCAG
291	IGS (trnW-CCA, trnP-UGG)	LSC	69911	T	69573	T	69885	T	69911	T	69912	T	69786	T	69406	T	69317	TAGGTAGGGATG
292	IGS (trnP-UGG, psaJ)	LSC	70101	T	69763	TCATATAA	70075	TCATATAA	70101	TCATATAA	70102	TCATATAA	69976	TCATATAA	69596	TCATATAA	69518	T
293	IGS (trnP-UGG, psaJ)	LSC	70120	TTA	69789	TTA	70101	T	70120	TTA	70128	TTA	70002	TTA	69622	TTA	69537	TTA
294	IGS (trnP-UGG, psaJ)	LSC	70271	CATACAA	69940	CATACAA	70250	CATACAAATATACAA	70271	CATACAAATATACAA	70279	CATACAAATATACAA	70153	CATACAAATATACAA	69773	CATACAAATATACAA	69688	C
295	IGS (psaJ, rpl33)	LSC	70564	T	70233	T	70551	T	70564	T	70580	T	70454	TC	70074	T	69975	T
296	IGS (psaJ, rpl33)	LSC	70701	A	70370	A	70688	AACAGA	70701	A	70717	A	70592	AACAGA	70211	A	70112	A
297	IGS (psaJ, rpl33)	LSC	70739	TTTAATTAG	70408	TTTAATTAG	70731	TTTAATTAG	70739	TTTAATTAG	70755	TTTAATTAG	70635	TTTAATTAG	70249	TTTAATTAG	70150	T
298	IGS (rps18, rpl20)	LSC	71702	GA	71371	GA	71694	GA	71702	GA	71718	GA	71598	GAA	71212	G	71105	GAA
299	IGS (rps18, rpl20)	LSC	71738	CT	71407	CT	71730	CT	71738	CT	71754	CT	71635	C	71247	CT	71142	CT
300	IGS (rps18, rpl20)	LSC	71873	TTACAAC	71542	TTACAAC	71865	TTACAAC	71873	TTACAAC	71889	TTACAAC	71769	TTACAAC	71382	TTACAAC	71277	T
301	IGS (rpl20, rps12)	LSC	72391	ATTTTTTTT	72060	ATTTTTTTTTT	72383	A	72391	ATTTTTTT	72407	ATTTTTTT	72287	ATTTTTTTT	71900	ATTTTTTTTT	71789	ATTTTTTTT
302	IGS (rpl20, rps12)	LSC	72415	A	72086	A	72399	A	72415	A	72430	A	72311	A	71925	A	71813	ATTTCAC
303	IGS (rpl20, rps12)	LSC	72471	TA	72142	TA	72455	T	72471	TA	72486	TA	72367	TA	71981	T	71875	TGTAAATAAGTAAATA
304	IGS (rpl20, rps12)	LSC	72621	AC	72292	AC	72604	AC	72621	AC	72636	AC	72517	AC	72130	AC	72039	A
305	IGS (rpl20, rps12)	LSC	72773	CT	72444	CT	72756	CT	72773	CT	72788	C	72669	CT	72282	CT	72190	C
306	clpP-intron 2	LSC	73565	C	73236	C	73548	C	73565	C	73579	C	73461	CAA	73074	C	72981	C
307	clpP-intron 2	LSC	73622	TGTGCA	73293	TGTGCA	73605	TGTGCA	73622	TGTGCA	73636	TGTGCA	73520	TGTGCA	73131	T	73038	TGTGCA
308	clpP-intron 2	LSC	73855	AT	73526	AT	73838	ATT	73855	AT	73869	AT	73753	A	73359	AT	73271	AT
309	clpP-intron 2	LSC	73875	C	73546	C	73859	C	73875	C	73889	C	73772	C	73379	C	73291	CATAAATAAC
310	clpP-intron 2	LSC	74011	GAA	73682	GA	73995	GAA	74011	GA	74025	GA	73908	GAA	73515	GA	73436	G
311	clpP-intron 2	LSC	74094	CT	73764	CTT	74078	C	74094	CTT	74107	CT	73991	CT	73597	CTTTTT	73517	CTT
312	clpP-intron 2	LSC	74105	CAAATAA	73776	CAAATAA	74088	CAAATAA	74105	CAAATAA	74118	CAAATAA	74002	CAAATAA	73612	CAAATAA	73529	C
313	clpP-intron 1	LSC	74497	G	74168	CGAA	74480	CG	74497	GAAA	74510	GCGA	74394	C	74004	CG	73915	CGAAAA
314	clpP-intron 1	LSC	74615	TA	74289	T	74599	T	74615	TA	74631	T	74512	T	74123	T	74038	T
315	clpP-intron 1	LSC	74839	CT	74512	CT	74822	CCT	74839	C	74854	CTTT	74735	CT	74346	CTT	74261	CT
316	clpP-intron 1	LSC	74980	G	74653	G	74964	GT	74980	G	74997	G	74876	G	74488	G	74402	G
317	IGS (clpP, psbB)	LSC	75299	AA	74972	AA	75284	AA	75299	AT	75316	AA	75195	AA	74807	AA	74721	A
318	IGS (clpP, psbB)	LSC	75667	GT	75340	GT	75652	GT	75667	GT	75684	GT	75563	G	75175	GT	75088	GT
319	IGS (psbB, psbT)	LSC	77258	ACATTGCTCTGGTATCTTTCGCCTCTATT	76931	ACATTGCTCTGGTATCTTTCGCCTCTATT	77243	ACATTGCTCTGGTATCTTTCGCCTCTATT	77258	ACTATTTTT	77275	AGATTGCTCTGGTATCTTTCGCCTCTATT	77153	ACA	76766	ACATTGCTCTGGTATCTTTCGCCTCTATT	76679	ACATTGCTCTGGTATCTTTCGCCTCTACT
320	IGS (psbB, psbT)	LSC	77293	T	76966	T	77278	T	77293	T	77310	TT	77162	TT	76801	TT	76714	TT
321	IGS (psbB, psbT)	LSC	77295	A	76968	A	77280	T	77295	A	77313	A	77165	A	76804	TATTTGACAC	76717	TAATTTGACAC
322	IGS (psbN, psbH)	LSC	77723	T	77396	TATATA	77708	TATATA	77723	T	77741	TATATA	77593	TATATA	77241	TATATA	77155	TATATA
323	petB-intron 1	LSC	78398	C	78076	CTTTCAAA	78388	CTTTCAAA	78398	C	78421	CTTTCAAA	78273	CTTTCAAA	77921	C	77835	CTTTCAAA
324	petB-intron 1	LSC	78402	CT	78087	CT	78399	CT	78402	CT	78432	CT	78284	CT	77925	CT	77846	C
325	petB-intron 1	LSC	78461	CTATTCA	78146	CTATTCA	78458	C	78461	CTATTCA	78491	CTATTCA	78343	CTATTCA	77984	CTATTCA	77904	CTATTCA
326	petB-intron 1	LSC	78662	C	78347	C	78653	C	78662	C	78692	C	78544	CA	78185	C	78105	C
327	petB-intron 1	LSC	78704	T	78389	T	78695	T	78704	T	78734	T	78587	TAATGATCAATATA	78227	T	78147	T
328	petB-intron 1	LSC	78844	C	78529	CTATTACAT	78835	C	78844	C	78874	C	78740	C	78367	C	78287	C
329	petD-intron 1	LSC	80209	G	79902	GGATAAA	80200	GGATAAA	80209	G	80239	GGATAAA	80105	GGATAAA	79732	G	79652	G
330	petD-intron 1	LSC	80289	A	79988	A	80286	A	80289	A	80325	A	80191	A	79812	ATTT	79732	A
331	petD-exon 2	LSC	80957	A	80656	A	80954	A	80957	AATTTTTT	80993	A	80859	A	80483	A	80400	A
332	IGS (petD, rpoA)	LSC	81124	TA	80823	TAAAA	81121	TA	81124	T	81160	TA	81026	TA	80650	T	80567	GAAA
333	IGS (rps8, rpl14)	LSC	83810	TTTTTTG	83512	TTTTTTG	83807	T	83810	TTTTTTG	83846	TTTTTTG	83712	TTTTTTG	83335	TTTTTTG	83255	TTTTTTG
334	IGS (rps8, rpl14)	LSC	83889	T	83591	T	83880	TC	83889	T	83925	T	83791	T	83414	T	83334	T
335	IGS (rpl14, rpl16)	LSC	84302	CA	84004	C	84294	CA	84302	CA	84338	C	84204	TA	83827	CA	83747	CA
336	IGS (rpl14, rpl16)	LSC	84317	GA	84018	GA	84309	G	84317	GA	84352	GA	84219	GA	83842	GA	83762	G
337	IGS (rpl14, rpl16)	LSC	84340	CA	84041	CAAA	84331	CAAA	84340	CAAA	84375	CA	84242	CAA	83865	CAA	83784	CAA
338	IGS (rpl14, rpl16)	LSC	84351	AAAACGGC	84054	AAAACGGC	84344	A	84351	AAAACGGC	84386	AAAACGGC	84254	AAAACGGC	83877	AAAATGGC	83796	AAAACGGC
339	rpl16-intron 1	LSC	84886	T	84589	T	84872	T	84886	T	84921	T	84789	TTAAAA	84412	T	84331	T
340	rpl16-intron 1	LSC	84891	A	84594	AATATT	84877	AATATT	84891	A	84926	AATATT	84799	AATATT	84417	AATATT	84336	AATATT
341	rpl16-intron 1	LSC	85037	ATA	84745	ATA	85028	ATA	85037	ATA	85077	ATA	84950	ATA	84568	CTA	84487	T
342	rpl16-intron 1	LSC	85741	CTTTT	85449	CTTT	85732	CTTT	85741	CTTTTT	85781	CTTT	85654	CTTT	85272	CT	85189	C
343	rpl16-intron 1	LSC	85765	T	85472	T	85755	T	85765	T	85804	T	85677	T	85293	T	85209	TAA
344	IGS (rpl16, rps3)	LSC	85812	TATCAAA	85519	TATCAAA	85802	TATCAAA	85812	TATCAAA	85851	TATCAAA	85724	T	85340	TATCAAA	85258	TATCAAA
345	IGS (rpl16, rps3)	LSC	85825	TGGTCAA	85532	TGGTCAA	85815	TGATCAA	85825	TGGTCAA	85864	T	85731	TGGTTAA	85353	TGGTCAA	85271	TGGTCAA
346	IGS (rpl16, rps3)	LSC	85864	AT	85571	AT	85854	AT	85864	AT	85897	AT	85770	AT	85392	ATT	85310	A
347	IGS (rps3, rpl22)	LSC	86654	T	86361	T	86644	T	86654	T	86687	T	86560	T	86183	T	86099	TA
348	IGS (rpl22, rps19)	LSC	87140	C	86847	C	87130	C	87140	C	87173	C	87046	C	86669	C	86586	CATCTAT
349	IGS (rps19, rpl2)	IRb	87454	AT	87161	ATTT	87444	ATT	87454	A	87487	ATTT	87360	ATTT	86983	ATTTTTTTT	86906	A
350	rpl2-intron 1	IRb	88254	A	87963	AT	88245	AT	88254	A	88289	AT	88162	AT	87790	AT	87705	AT
351	rpl2-intron 1	IRb	88363	CTTCTGG	88073	CTTCTGG	88355	CTTCTGG	88363	CTTCTGG	88399	CTTCTGG	88272	C	87900	CTTCTGG	87815	CTTCTGG
352	ycf2	IRb	89838	AATCGAT	89548	AATCGAT	89830	AATCGAT	89838	AATCGAT	89874	AATCGAT	89741	A	89375	AATCGAT	89290	AATCGAT
353	ycf2	IRb	90214	ATGAAAC	89924	ATGAAAC	90206	ATGAAAC	90214	ATGAAAC	90250	ATGAAAC	90111	ATGAAAC	89751	ATGAAAC	89666	A
354	ycf2	IRb	90687	AATGTGT	90397	AATGTGT	90679	AATGTGT	90687	AATGTGT	90723	AATGTGT	90584	AATGTGT	90224	A	90133	AATGTGT
355	ycf2	IRb	94493	T	94203	T	94485	T	94493	T	94424	T	94390	T	94024	T	93939	TCATTCT
356	ycf2	IRb	95831	GGAAGGA	95541	GGAAGGA	95823	G	95831	GGAAGGA	95762	GGAAGGA	95728	G	95362	GGAAGGA	95283	GGAAGGA
357	ycf2	IRb	95926	TATTTGA	95636	TATTTGA	95912	TATTTGA	95926	TATTTGA	95857	TATTTGA	95817	T	95457	TATTTGA	95378	TATTTGA
358	ycf2	IRb	96008	T	95718	T	95994	T	96008	T	95939	T	95893	T	95539	T	95460	TGAAGAG
359	IGS (ycf2, trnL-CAA)	IRb	96555	A	96265	A	96541	AC	96555	A	96486	A	96440	A	96086	A	96013	A
360	IGS (ycf2, trnL-CAA)	IRb	96888	ATT	96598	ATCTGCT	96875	ATCTGCT	96888	ATCTGCT	96819	AT	96773	ATCTGCT	96419	A	96346	ATCTGCT
361	IGS (ycf2, trnL-CAA)	IRb	96891	GGGTTAC	96605	GGGTTAC	96882	GGGTTAC	96891	GGGTTAC	96821	GGGTTAC	96780	G	96420	GGGTTAC	96353	GGGTTAC
362	IGS (ycf2, trnL-CAA)	IRb	97092	GATATCA	96806	GATATCA	97083	GATATCA	97092	GATATCA	97022	GATATCA	96975	G	96621	GATATTG	96554	GATATCA
363	IGS (trnL-CAA, ndhB)	IRb	97413	AAAAG	97127	A	97404	AAAAG	97413	AAAAG	97343	AAAAG	97290	AAAAG	96942	AAAAG	96875	AAAAG
364	IGS (trnL-CAA, ndhB)	IRb	97505	TTATGCC	97215	TTATGCC	97496	TTATGCC	97505	TTATGCC	97435	TTATGCC	97382	TTATGCC	97034	T	96967	TTATGCC
365	IGS (trnL-CAA, ndhB)	IRb	97679	CAGATTAT	97389	C	97670	CAGATTAT	97679	CAGATTAT	97609	CAGATTAT	97556	CAGATTAT	97202	CAGATTAT	97141	CAGATTAT
366	IGS (rps12, trnV-GAC)	IRb	102043	TCTTT	101746	TCTTT	102034	TCTTT	102043	TCTTT	101973	TCTTT	101920	TCTTC	101566	T	101505	TCTTT
367	IGS (rps12, trnV-GAC)	IRb	102246	TTCTGTA	101949	TTCTGTA	102237	TTCTGTA	102246	TTCTGTA	102176	TTCTGTA	102123	TTCTGTA	101765	TTCTGTA	101708	T
368	IGS (rps12, trnV-GAC)	IRb	102488	C	102191	C	102479	C	102488	C	102418	C	102365	C	102007	C	101944	CCG
369	IGS (rps12, trnV-GAC)	IRb	102538	CTATTATA	102241	CT	102529	CTATTATA	102538	CTATTATA	102468	CT	102415	CTATTATA	102057	CTATTATA	101996	C
370	IGS (rps12, trnV-GAC)	IRb	102890	TAAATGA	102587	TAAATGA	102881	TAAATGA	102890	TAAATGA	102814	T	102767	TAAATGA	102409	TAAATGA	102341	TAAATGA
371	IGS (rps12, trnV-GAC)	IRb	103128	GATTCCTCTA	102825	GATTCCTCTA	103119	GATTCCTCTA	103128	GATTCCTCTA	103046	GATTCCTCTA	103005	GATTCCTCTA	102647	GATTCCTCTA	102579	G
372	IGS (rrn16, trnI-GAU)	IRb	105337	A	105034	AACTTGG	105328	A	105337	A	105255	A	105214	A	104856	A	104779	A
373	trnI-GAU-intron 1	IRb	106027	C	105730	CTT	106018	CTT	106027	C	105945	CT	105904	CT	105546	CT	105469	CTTT
374	trnI-GAU-intron 1	IRb	106340	TGGACC	106045	TGGACC	106333	TGGACC	106340	TGGACC	106259	TGGACC	106218	TGGACC	105860	T	105785	TGGACC
375	trnA-UGC-intron 1	IRb	107110	A	106815	A	107103	A	107110	A	107029	A	106988	A	106625	A	106555	AT
376	IGS (rrn4.5, rrn5)	IRb	110601	TGTTCAACTCTTTGACAACACGAAAAAACCATT	110306	TGTTCAACTCTTTGACAACACGAAAAAACCATT	110594	TGTTCAACTCTTTGACAACACGAAAAAACCATT	110601	TGTTCAACTCTTTGACAACACGAAAAAACCATT	110520	TTCTTTGACAACACGAAAAAACCATT	110479	TGTTCAACTCTTTGACAACACGAAAAAACCATT	110116	T	110047	TGTTCAACTCTTTGACAACACGAAAAAACCATT
377	IGS (rrn4.5, rrn5)	IRb	110654	GA	110359	GA	110647	GA	110654	GA	110566	GA	110532	GA	110137	GA	110100	G
378	IGS (rrn5, trnR-ACG)	IRb	110973	GAAAA	110678	GAAAAAAAA	110966	GAAAAAA	110973	GAAA	110885	GAAAAAA	110851	GAAAAA	110456	G	110418	GAAAAAAA
379	IGS (rrn5, trnR-ACG)	IRb	111126	C	110835	C	111121	C	111126	C	111040	C	111005	C	110605	C	110574	CT
380	IGS (trnR-ACG, trnN-GUU)	IRb	111343	TTGTCGAAA	111052	TTGTCGAAA	111338	TTGTCGAAA	111343	TTGTCGAAA	111257	TTGTCGAAA	111222	TTGTCGAAATGGAA	110822	T	110792	TTGTCGAAA
381	IGS (trnR-ACG, trnN-GUU)	IRb	111367	T	111076	TT	111362	TT	111367	TTA	111281	TT	111251	TT	110838	TTT	110816	T
382	IGS (trnR-ACG, trnN-GUU)	IRb	111422	GCCGAAC	111132	GCCGAAC	111418	GCCGAAC	111422	GCCGAAC	111337	GCCGAAC	111307	G	110895	GCCGAAC	110871	GCCTAAC
383	IGS (trnR-ACG, trnN-GUU)	IRb	111439	AT	111149	A	111435	AT	111439	A	111354	AT	111318	A	110912	AT	110888	A
384	ycf1	IRb-SSC	113371	CCACC	113080	CCACTATAAACG	113367	CCACC	113371	CCACTATAAACG	113286	CCACTATAAACG	113249	CGACC	112844	CCACTATAACC	112819	CCACC
385	IGS (ndhF, rpl32)	SSC	115854	AGAAAAT	115570	AGAAAAT	115850	A	115854	AGAAAAT	115776	AGAAAAT	115732	AGAAAAT	115333	AGAAAAT	115302	A
386	IGS (ndhF, rpl32)	SSC	115915	A	115631	A	115905	AT	115915	A	115837	A	115793	A	115394	A	115357	A
387	IGS (ndhF, rpl32)	SSC	115955	T	115671	T	115946	T	115955	T	115877	TAAGGTC	115833	T	115434	T	115397	T
388	IGS (ndhF, rpl32)	SSC	115982	T	115698	T	115973	T	115982	T	115910	T	115860	T	115461	TAA	115424	T
389	IGS (ndhF, rpl32)	SSC	116054	CAA	115770	C	116045	CAA	116054	CAA	115982	CAA	115932	CAAA	115535	CAA	115496	CAA
390	IGS (ndhF, rpl32)	SSC	116134	TATCCCTGCATGTATCTTTGAACAGATTTACTACTA	115848	TTATCCCTGCATGTATCTTTGAACAGATTTACTACTA	116125	TATCCCTGCATGTATCTTTGAAGAGATTTACTACTA	116134	TATCCCTGCATGTATCTTTGAACAGATTTACTACTA	116062	T	116013	TATCCCTGCATGTATCTTTGAACAGATTTACTACTA	115615	TATCCCTGCATGTATCTTTGAACAGATTTACTACTA	115576	TATCCCTGCATGTCTCTTTGAACAGATTTACTATTA
391	IGS (ndhF, rpl32)	SSC	116185	GATTTT	115900	TATTTT	116176	T	116185	GATTTT	116078	TATTTG	116064	T	115666	TATTTT	115627	TATTTT
392	IGS (ndhF, rpl32)	SSC	116196	AAAAG	115911	A	116182	AAAAG	116196	AAAAG	116089	AAAAG	116070	AAAAG	115677	AAAAG	115638	AAAAG
393	IGS (ndhF, rpl32)	SSC	116265	GT	115976	GT	116251	GT	116265	GT	116158	GT	116139	GT	115746	G	115707	GT
394	IGS (ndhF, rpl32)	SSC	116279	T	115990	T	116265	T	116279	TAATTA	116172	T	116153	T	115759	T	115721	T
395	IGS (ndhF, rpl32)	SSC	116331	AG	116042	AG	116317	AG	116331	AG	116224	AG	116205	AG	115811	AG	115773	A
396	IGS (ndhF, rpl32)	SSC	116390	T	116101	T	116376	T	116390	T	116283	T	116264	T	115870	T	115831	TCC
397	IGS (ndhF, rpl32)	SSC	116428	CTATAGTTA	116139	CTATAGTTA	116414	CTATAGTTA	116428	CTATAGTTA	116321	CTATAGTTA	116302	CTATAGTTA	115908	C	115871	CTATAGTTA
398	IGS (ndhF, rpl32)	SSC	116624	A	116335	AATAAATGGATAGATAATAAATAG	116610	AATAAATGGATAGATAATAAATAG	116624	A	116517	AATAAATGGATAGATAATAAATAG	116498	AATAAATGGATAGATAATAAATAG	116096	AATAAATGGATAGATAATAAATAG	116067	AATAAATGGATAGCTAATAAATAG
399	IGS (ndhF, rpl32)	SSC	116630	G	116364	G	116639	GTAAATAAGGATTCATTTTAAA	116630	G	116546	G	116527	G	116125	G	116096	G
400	IGS (ndhF, rpl32)	SSC	116701	CATTTTTG	116435	CATTTTTG	116731	CATTTTTG	116701	CATTTTTG	116617	CATTTTTG	116598	CATTTTTG	116196	CATTTTTG	116167	C
401	IGS (rpl32, trnL-UAG)	SSC	116895	TA	116629	TA	116925	TAA	116895	TA	116811	TA	116792	TAA	116390	TA	116354	T
402	IGS (rpl32, trnL-UAG)	SSC	116997	TA	116731	TA	117028	TA	116997	TA	116913	TA	116895	TA	116492	T	116455	TA
403	IGS (rpl32, trnL-UAG)	SSC	117062	CT	116796	CT	117093	CT	117062	C	116978	C	116960	CT	116556	C	116520	CT
404	IGS (rpl32, trnL-UAG)	SSC	117128	T	116862	T	117159	T	117128	TA	117043	T	117026	T	116621	T	116586	T
405	IGS (rpl32, trnL-UAG)	SSC	117139	TA	116873	TA	117170	TA	117139	TA	117054	TA	117037	T	116632	TA	116597	TA
406	IGS (rpl32, trnL-UAG)	SSC	117141	AT	116875	AA	117172	AT	117141	A	117056	AA	117038	AA	116634	AT	116599	AT
407	IGS (rpl32, trnL-UAG)	SSC	117271	GA	117005	GAA	117302	GAAA	117271	G	117186	GAAA	117168	GA	116764	G	116729	GA
408	IGS (rpl32, trnL-UAG)	SSC	117483	CCGCTAT	117243	C	117363	C	117483	CCGCTAT	117434	C	117403	C	116903	CCGCTAT	116960	CCCCTAT
409	IGS (rpl32, trnL-UAG)	SSC	117547	GA	117301	GA	117421	GA	117547	GA	117492	GA	117461	GA	116967	G	117024	GA
410	IGS (rpl32, trnL-UAG)	SSC	117568	ATCTACCT	117322	ATATACCT	117442	ATATACCT	117568	ATCTACCT	117513	ATATACCT	117482	ATATACTT	116987	ATATACCT	117045	A
411	IGS (rpl32, trnL-UAG)	SSC	117628	ACGGGTTTGT	117382	ACGGGTTTGT	117502	A	117628	ACGGGTTTGT	117573	ACGGGTTTGT	117542	ACGGGTTTGT	117047	ACGGGTTTGT	117098	ACAGGTTTGT
412	IGS (trnL-UAG, ccsA)	SSC	117892	T	117646	T	117757	T	117892	T	117837	T	117806	TC	117311	T	117362	T
413	IGS (ccsA, ndhD)	SSC	118918	T	118672	TT	118783	T	118918	T	118863	TTTATA	118833	T	118337	T	118388	T
414	IGS (ccsA, ndhD)	SSC	118951	C	118706	CAAGA	118816	CAAGA	118951	C	118901	CAAGA	118866	CAAGA	118370	C	118421	C
415	IGS (ccsA, ndhD)	SSC	119024	CTTTT	118783	CTTTTTTTT	118893	CTTTTTTT	119024	CTTTTT	118978	CTTTTTTT	118943	CTTTTTTT	118443	CTTTTTTT	118494	T
416	IGS (ccsA, ndhD)	SSC	119040	CAACAT	118803	CAACAT	118912	CAACAT	119040	CAACAT	118997	CAACAT	118962	CAACAT	118462	C	118506	CAACAT
417	IGS (ndhD, psaC)	SSC	120652	C	120415	C	120524	C	120652	CA	120609	C	120574	C	120069	C	120118	C
418	IGS (ndhD, psaC)	SSC	120680	GGGTTTT	120443	GGGTTTT	120552	GGGTTTT	120680	GGGTTTT	120637	GGGTTTT	120602	GGGTTTT	120097	G	120146	GGGTTTT
419	IGS (ndhD, psaC)	SSC	120692	T	120455	TA	120564	TA	120692	TA	120649	TA	120614	TA	120103	TA	120158	TA
420	IGS (psaC, ndhE)	SSC	121040	A	120804	A	120913	A	121040	A	120998	A	120963	ATATATCA	120452	A	120507	A
421	IGS (psaC, ndhE)	SSC	121175	CATACAA	120939	CATACAA	121048	CATACAA	121175	CATACAA	121133	CATACAA	121105	CATACAA	120587	C	120642	CATACAA
422	IGS (ndhE, ndhG)	SSC	121644	TAACTAACAAGTGCGG	121408	TAACTAACAAGTGCGG	121517	TAACTAACAAGTGCGT	121644	TAACTAACAAGTGCGG	121602	TAACTAACAAGTGCGG	121574	TAACTAACAAGTGCGG	121050	T	121111	TAACTAACAAGTGCGG
423	IGS (ndhE, ndhG)	SSC	121730	TTATTTT	121494	TTATTTT	121603	TTAGTTC	121730	TTATTTT	121688	TTATTTT	121660	TTATCTT	121121	TTATTTT	121197	T
424	IGS (ndhG, ndhI)	SSC	122501	CTATATAT	122265	CTATATAT	122374	CTATATAT	122501	CTATATAT	122459	CTATATAT	122431	CTATATAT	121892	CTATATAT	121962	C
425	IGS (ndhI, ndhA)	SSC	123235	A	122999	A	123108	A	123235	A	123193	A	123165	A	122626	A	122689	ATATTT
426	ndhA-intron 1	SSC	123975	TA	123739	TA	123848	TA	123975	TA	123933	TA	123905	TA	123366	TA	123434	T
427	ndhA-intron 1	SSC	124097	A	123861	A	123970	A	124097	A	124055	A	124027	A	123488	AT	123555	A
428	ndhA-intron 1	SSC	124109	GA	123873	G	123982	GA	124109	G	124067	G	124039	GAAA	123501	GA	123567	GA
429	ndhA-intron 1	SSC	124131	T	123894	T	124004	T	124131	T	124088	T	124063	T	123523	T	123589	TTAAAATAAAGAATAAAAAGAGCTC
430	ndhA-intron 1	SSC	124135	CT	123898	CT	124008	C	124135	CT	124092	CTT	124067	CT	123527	CT	123617	CTT
431	ndhA-intron 1	SSC	124215	T	123978	TA	124087	TA	124215	TA	124173	TA	124147	TA	123607	TA	123698	TA
432	ndhA-intron 1	SSC	124219	A	123983	A	124092	A	124219	A	124178	A	124152	AT	123612	AA	123703	A
433	ndhA-intron 1	SSC	124356	T	124120	T	124229	T	124356	T	124315	T	124290	T	123750	T	123840	TGCAGA
434	ndhA-intron 1	SSC	124385	T	124149	T	124258	T	124385	T	124344	T	124319	T	123779	T	123874	TAC
435	ndhA-intron 1	SSC	124456	GTATGGTAATACACGTATTG	124220	GTATGGTAATACACGTATTG	124329	G	124456	GTATGGTAATACACGTATTG	124415	GTATGGTAATACACGTATTA	124390	GTATGATAATACACGTATTG	123850	GTATGGTAATACACGTATTG	123947	GTATGGTAATACACGTATTG
436	IGS (ndhH, rps15)	SSC	126565	T	126329	T	126419	T	126565	T	126524	T	126499	T	125959	T	126056	TA
437	IGS (rps15, ycf1-2)	SSC	126906	CTC	126670	C	126760	CTC	126906	CCC	126865	CC	126840	CTC	126300	CTC	126398	CC
438	IGS (rps15, ycf1-2)	SSC	126915	C	126677	C	126769	C	126915	CT	126873	C	126849	C	126309	CCC	126406	T
439	IGS (rps15, ycf1-2)	SSC	127114	TA	126876	TA	126968	TA	127114	T	127072	TA	127048	TA	126510	TA	126605	TA
440	IGS (rps15, ycf1-2)	SSC	127117	A	126879	AAAAA	126971	AAAT	127117	A	127075	AAATAAA	127051	AAAT	126513	AA	126608	AA
441	IGS (rps15, ycf1-2)	SSC	127239	G	127005	GA	127096	GA	127239	GA	127203	GA	127176	GA	126636	GA	126731	GA
442	ycf1-2	SSC	127427	TATATCA	127194	TATATTA	127285	TATATTA	127427	TATATCA	127392	TATATTA	127365	TATATTA	126825	T	126920	TATATTA
443	ycf1-2	SSC	128534	ATAATTA	128184	ATAATTA	128392	ATAATTA	128534	ATAATTA	128499	ATAATTA	128472	ATAATTA	127926	ATAATTA	128027	A
444	ycf1-2	SSC	129831	A	129481	ACTTTTC	129689	ACTTTTC	129831	C	129796	ACTTTTC	129769	ACTTTTC	129223	ACTTTTC	129318	ACTTTTC
445	ycf1-2	SSC	129924	TCTTTTGCGA	129580	TCTTTTGCAA	129788	TCTTTTGCGA	129924	TCTTTTGCGA	129895	TCTTTTGCGA	129868	T	129322	TCTTTTGCGA	129417	TCTTTTGCGA
446	ycf1-2	SSC	129968	TATTAGAACT	129624	TATTAGAACG	129832	T	129968	TATTAGAACT	129939	TATTAGAACG	129903	TATTAGAACT	129366	TATTAGAACT	129461	TATTAGAATT
447	ycf1-2	SSC	130115	ATCTTTT	129771	A	129970	ATCTTTT	130115	ATCTTTT	130086	A	130050	ATCTTTT	129513	ATCTTTT	129608	A
448	ycf1-2	SSC	130840	TATTAGT	130490	TATTAGT	130695	TATTAGT	130840	TATTAGT	130805	T	130775	TATTAGT	130238	TATTAGT	130327	TATTAGT
449	ycf1-2	SSC	131130	T	130780	TGTTCTG	130985	TGTTCTG	131130	T	131089	TGTTCTG	131065	TGTTCTG	130528	TGTTCTG	130617	TGTTCTG
450	IGS (trnN-GUU-2, trnR-ACG-2)	IRa	133721	CA	133377	C	133582	CA	133721	C	133686	CA	133662	C	133125	CA	133214	C
451	IGS (trnN-GUU-2, trnR-ACG-2)	IRa	133738	ATTCGGG	133393	ATTCGGG	133599	ATTCGGG	133738	ATTCGGG	133703	ATTCGGG	133678	A	133142	ATTCGGG	133230	ATTCGGG
452	IGS (trnN-GUU-2, trnR-ACG-2)	IRa	133803	A	133458	AA	133664	AA	133803	AAT	133768	AA	133737	AA	133207	AAA	133295	A
453	IGS (trnN-GUU-2, trnR-ACG-2)	IRa	133813	A	133469	C	133675	C	133813	C	133779	C	133748	CCATTC	133219	C	133305	C
454	IGS (trnN-GUU-2, trnR-ACG-2)	IRa	133818	CCATTTCGA	133474	CCATTTCGA	133680	CCATTTCGA	133818	CCATTTCGA	133784	CCATTTCGA	133758	CCATTTCGA	133224	C	133310	CCATTTCGA
455	IGS (trnR-ACG-2, rrn5-2)	IRa	134038	C	133694	C	133900	C	134038	C	134004	C	133978	C	133436	C	133530	CA
456	IGS (trnR-ACG-2, rrn5-2)	IRa	134189	CTTTT	133845	CTTTTTTTT	134051	CTTTTTT	134189	CTTT	134155	CTTTTTT	134129	CTTTTT	133587	T	133682	CTTTTTTT
457	IGS (rrn5-2, rrn4.5-2)	IRa	134511	GT	134171	GT	134375	GT	134511	GT	134479	GT	134452	GT	133905	GT	134007	G
458	IGS (rrn5-2, rrn4.5-2)	IRa	134538	CAATGGTTTTTTCGTGTTGTCAAAGAGTTGAAC	134198	CAATGGTTTTTTCGTGTTGTCAAAGAGTTGAAC	134402	CAATGGTTTTTTCGTGTTGTCAAAGAGTTGAAC	134538	CAATGGTTTTTTCGTGTTGTCAAAGAGTTGAAC	134506	CAATGGTTTTTTCGTGTTGTCAAAGA	134479	CAATGGTTTTTTCGTGTTGTCAAAGAGTTGAAC	133932	C	134033	CAATGGTTTTTTCGTGTTGTCAAAGAGTTGAAC
459	trnA-UGC-intron 1	IRa	138061	T	137721	T	137925	T	138061	T	138022	T	138002	T	137423	T	137556	TA
460	trnI-GAU-2-intron 1	IRa	138826	TGGTCC	138486	TGGTCC	138690	TGGTCC	138826	TGGTCC	138787	TGGTCC	138767	TGGTCC	138188	T	138322	TGGTCC
461	trnI-GAU-2-intron 1	IRa	139134	G	138794	GAA	138998	GAA	139134	G	139095	GA	139075	GA	138491	GA	138630	GAAA
462	IGS (trnI-GAU-2, rrn16-2)	IRa	139827	C	139489	CTCCAAG	139693	C	139827	C	139789	C	139769	C	139185	C	139326	C
463	IGS (trnV-GAC-2, rps12-2)	IRa	142034	ATAGAGGAAT	141702	ATAGAGGAAT	141900	ATAGAGGAAT	142034	ATAGAGGAAT	141996	ATAGAGGAAT	141976	ATAGAGGAAT	141392	ATAGAGGAAT	141533	A
464	IGS (trnV-GAC-2, rps12-2)	IRa	142268	CTTCATT	141936	CTTCATT	142134	CTTCATT	142268	CTTCATT	142230	C	142210	CTTCATT	141626	CTTCATT	141758	CTTCATT
465	IGS (trnV-GAC-2, rps12-2)	IRa	142625	AATATAAT	142293	AA	142491	AATATAAT	142625	AATATAAT	142581	AA	142567	AATATAAT	141983	AATATAAT	142115	A
466	IGS (trnV-GAC-2, rps12-2)	IRa	142679	C	142341	C	142545	C	142679	C	142629	C	142621	C	142037	C	142162	CCG
467	IGS (trnV-GAC-2, rps12-2)	IRa	142912	CATACAG	142574	CATACAG	142778	CATACAG	142912	CATACAG	142862	CATACAG	142854	CATACAG	142270	CATACAG	142397	C
468	IGS (trnV-GAC-2, rps12-2)	IRa	143124	AAAAG	142786	AAAAG	142990	AAAAG	143124	AAAAG	143074	AAAAG	143066	AGAAG	142482	A	142603	AAAAG
469	IGS (ndhB-2, trnL-CAA-2)	IRa	147477	TTATAATC	147139	T	147343	TTATAATC	147477	TTATAATC	147427	TTATAATC	147419	TTATAATC	146831	TTATAATC	146956	TTATAATC
470	IGS (ndhB-2, trnL-CAA-2)	IRa	147657	AATAGGC	147312	AATAGGC	147523	AATAGGC	147657	AATAGGC	147607	AATAGGC	147599	AATAGGC	147011	A	147136	AATAGGC
471	IGS (ndhB-2, trnL-CAA-2)	IRa	147753	ATCTT	147408	A	147619	ATCTT	147753	ATCTT	147703	ATCTT	147695	ATCTT	147101	ATCTT	147232	ATCTT
472	IGS (trnL-CAA-2, ycf2-2)	IRa	148068	CGATATT	147719	CGATATT	147934	CGATATT	148068	CGATATT	148018	CGATATT	148010	C	147416	CGATATC	147547	CGATATT
473	IGS (trnL-CAA-2, ycf2-2)	IRa	148272	CCCGTAA	147923	CCCGTAA	148138	CCCGTAA	148272	CCCGTAA	148222	CCCGTAA	148208	C	147620	CCCGTAA	147751	CCCGTAA
474	IGS (trnL-CAA-2, ycf2-2)	IRa	148281	CAA	147932	CAGCAGA	148147	CAGCAGA	148281	CAGCAGA	148231	CA	148211	CAGCAGA	147629	C	147760	CAGCAGA
475	IGS (trnL-CAA-2, ycf2-2)	IRa	148614	A	148269	A	148484	AG	148614	A	148563	A	148548	A	147960	A	148097	A
476	ycf2-2	IRa	149157	G	148812	G	149028	G	149157	G	149106	G	149091	G	148503	G	148640	GCTCTTC
477	ycf2-2	IRa	149239	ATCAAAT	148894	ATCAAAT	149110	ATCAAAT	149239	ATCAAAT	149188	ATCAAAT	149173	A	148585	ATCAAAT	148728	ATCAAAT
478	ycf2-2	IRa	149327	GCTCCTT	148982	GCTCCTT	149198	G	149327	GCTCCTT	149276	GCTCCTT	149255	G	148673	GCTCCTT	148816	GCTCCTT
479	ycf2-2	IRa	150675	C	150330	C	150540	C	150675	C	150624	C	150597	C	150021	C	150164	CATGAGA
480	ycf2-2	IRa	154478	CACACAT	154133	CACACAT	154343	CACACAT	154478	CACACAT	154322	CACACAT	154400	CACACAT	153824	C	153973	CACACAT
481	ycf2-2	IRa	154951	GGTTTCA	154606	GGTTTCA	154816	GGTTTCA	154951	GGTTTCA	154795	GGTTTCA	154873	GGTTTCA	154291	GGTTTCA	154446	G
482	ycf2-2	IRa	155325	AATATCG	154980	AATATCG	155190	AATATCG	155325	AATATCG	155169	AATATCG	155247	A	154665	AATATCG	154814	AATATCG
483	rpl2-2-intron 1	IRa	156797	ACAGAAC	156452	ACAGAAC	156662	ACAGAAC	156797	ACAGAAC	156641	ACAGAAC	156713	A	156137	ACAGAAC	156286	ACAGAAC
484	rpl2-2-intron 1	IRa	156915	A	156570	AA	156780	AA	156915	A	156759	AA	156825	AA	156255	AA	156404	AA
485	IGS (rpl2-2, trnH-GUG)	IRa	157707	AATA	157363	AATAAA	157573	AATAA	157707	AAT	157552	AATAAA	157618	AATAAA	157048	AATAAATAAAA	157197	AAG
